# Supplementary material for: On the mechanism of imine elimination from Fischer tungsten carbene complexes
Source: PubMed Central journal article supplement (PMC4979739; doi:10.3762/bjoc.12.125), 2016-06-27
Supplement: Beilstein_J_Org_Chem-12-1322-s001.pdf [file Beilstein_J_Org_Chem-12-1322-s001.pdf]

# Supporting Information File

for

## On the mechanism of imine elimination from Fischer tungsten carbene complexes

Philipp Veit<sup>1</sup>, Christoph Förster<sup>1\*</sup> and Katja Heinze<sup>1\*</sup>

Address: <sup>1</sup>Institute of Inorganic and Analytical Chemistry, Johannes Gutenberg-University,  
Duesbergweg 10-14, 55128 Mainz, Germany

Email: Christoph Förster - cfoerster@uni-mainz.de; Katja Heinze - katja.heinze@uni-mainz.de

\* Corresponding authors

*In memoriam Prof. Dr. Peter Hofmann*

### Experimental spectra and DFT derived data

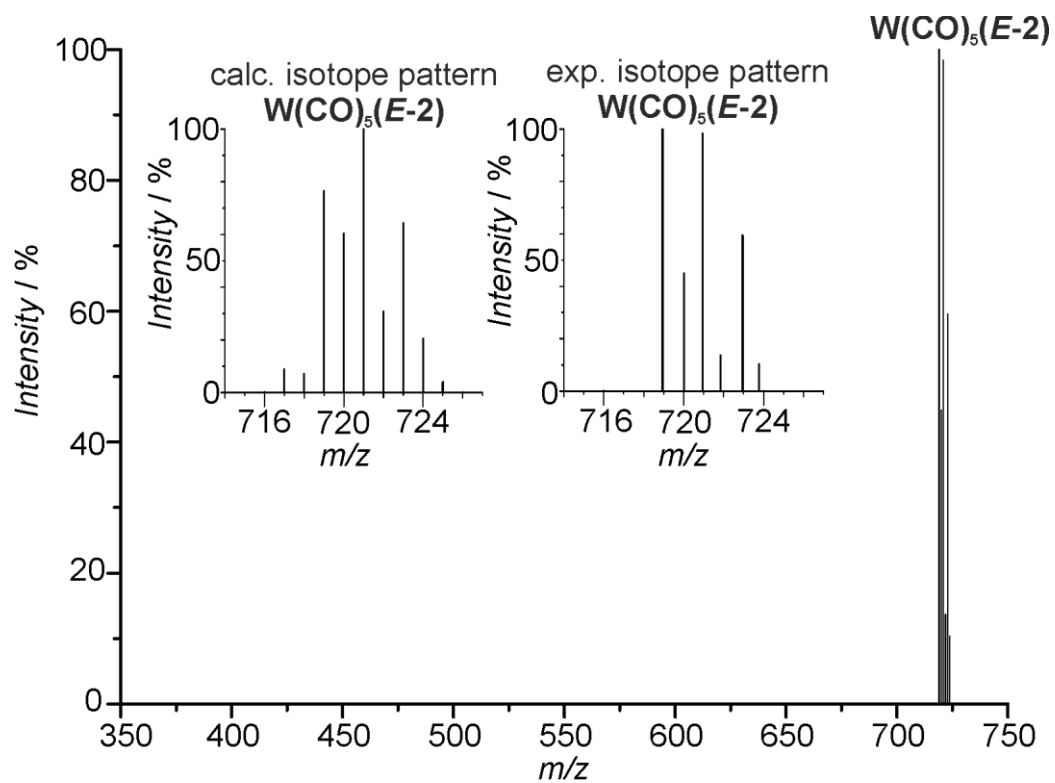

Figure S1: FD mass spectrum of  $W(CO)_5(E-2)$  in toluene.

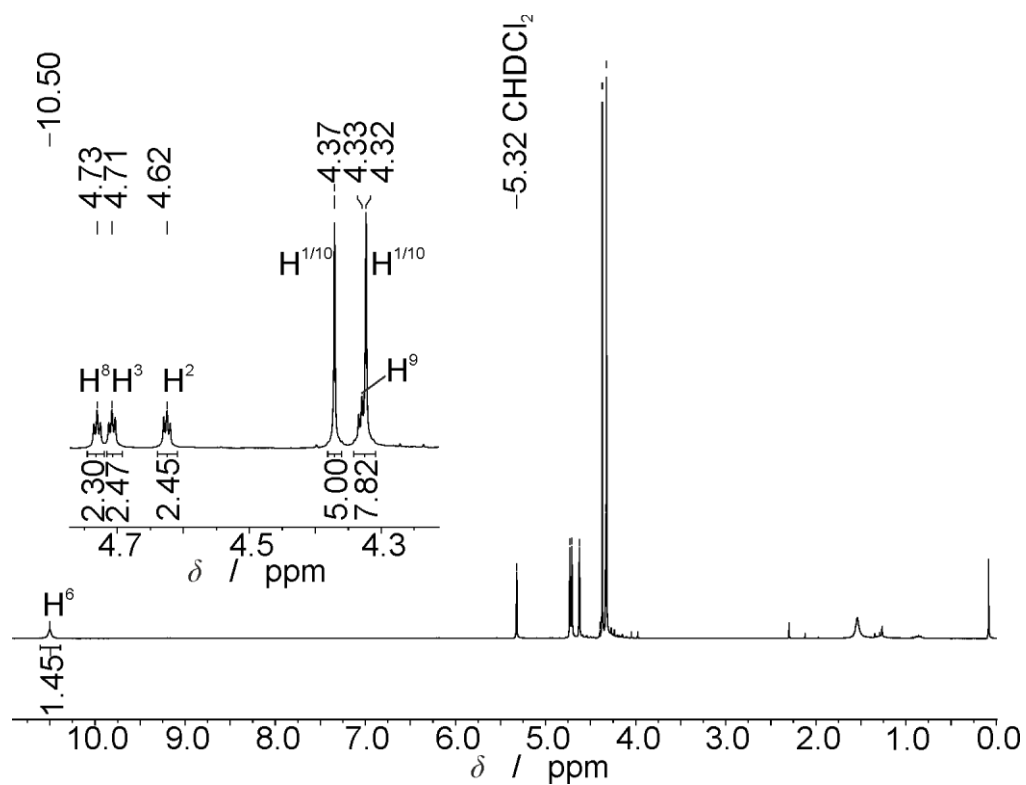

Figure S2:  $^1H$  NMR spectrum of  $W(CO)_5(E-2)$  in  $CD_2Cl_2$ .

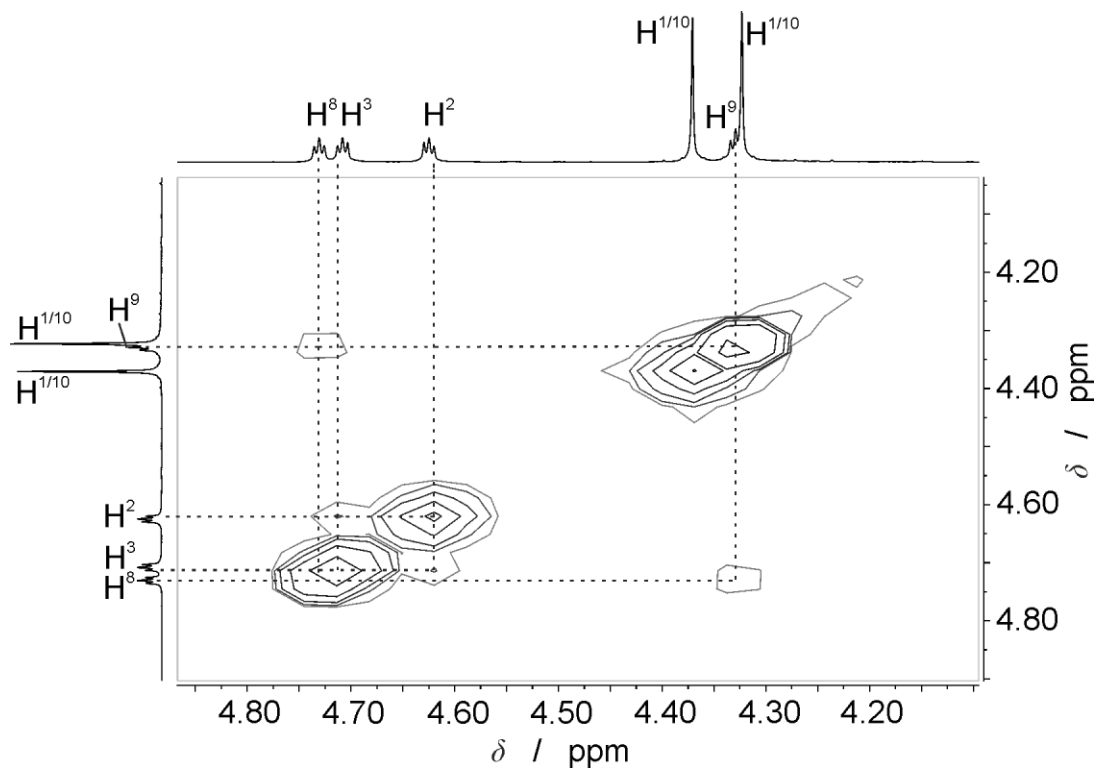

**Figure S3:**  $^1\text{H}$ - $^1\text{H}$  COSY of  $\text{W}(\text{CO})_5(\text{E-2})$  in  $\text{CD}_2\text{Cl}_2$ .

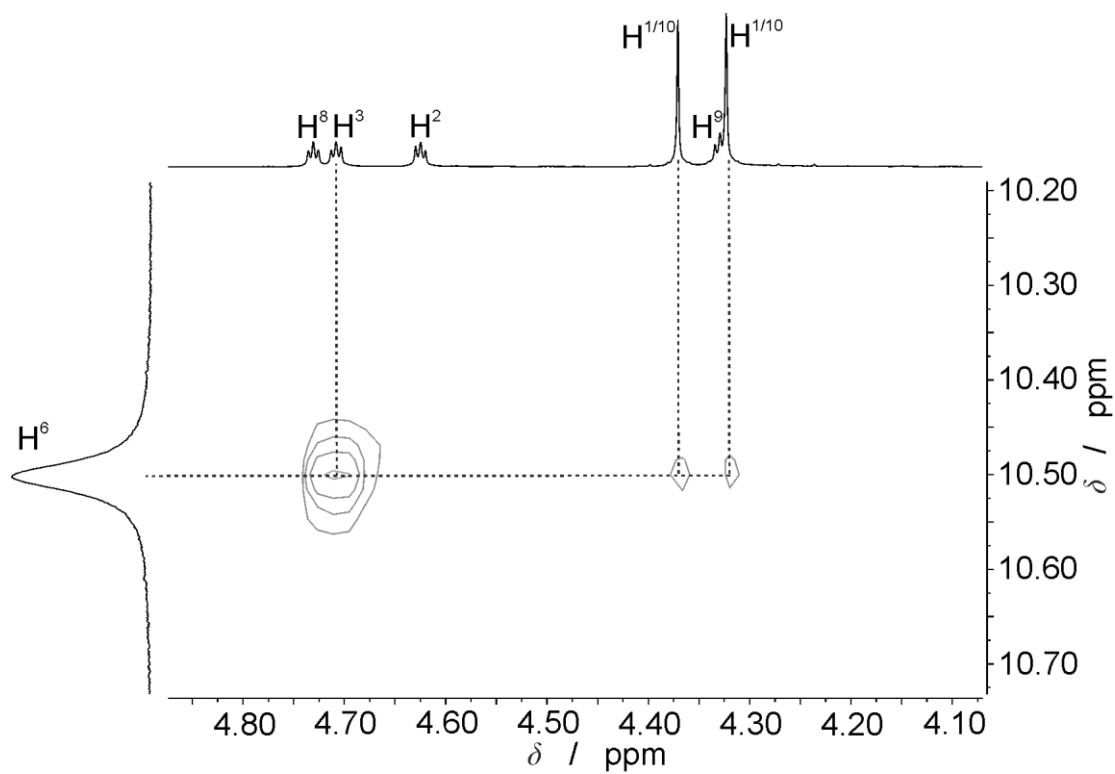

**Figure S4:**  $^1\text{H}$ - $^1\text{H}$  NOESY of  $\text{W}(\text{CO})_5(\text{E-2})$  in  $\text{CD}_2\text{Cl}_2$ .

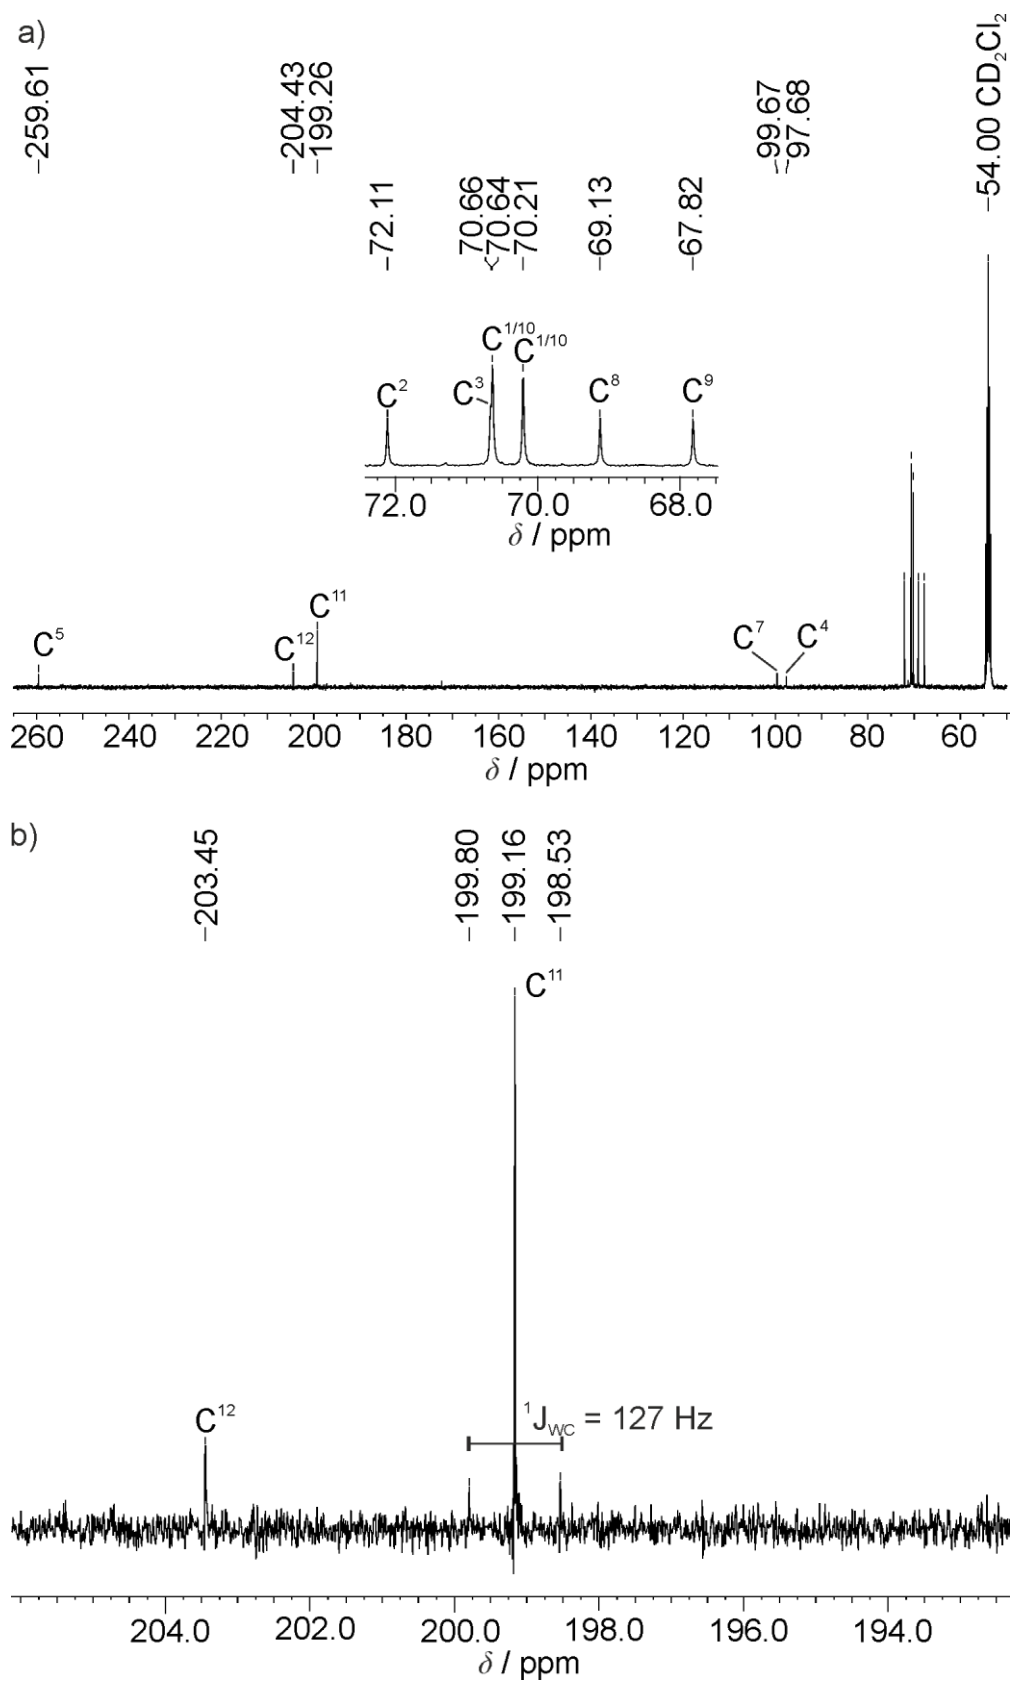

**Figure S5:** a)  $^{13}\text{C}\{^1\text{H}\}$  NMR spectrum of  $\text{W}(\text{CO})_5(\text{E-2})$  in  $\text{CD}_2\text{Cl}_2$  and b) zoom into the CO region showing the  $^{183}\text{W}$  satellites in the  $^{13}\text{C}\{^1\text{H}\}$  NMR spectrum of  $\text{W}(\text{CO})_5(\text{E-2})$  in  $d_8$ -toluene.

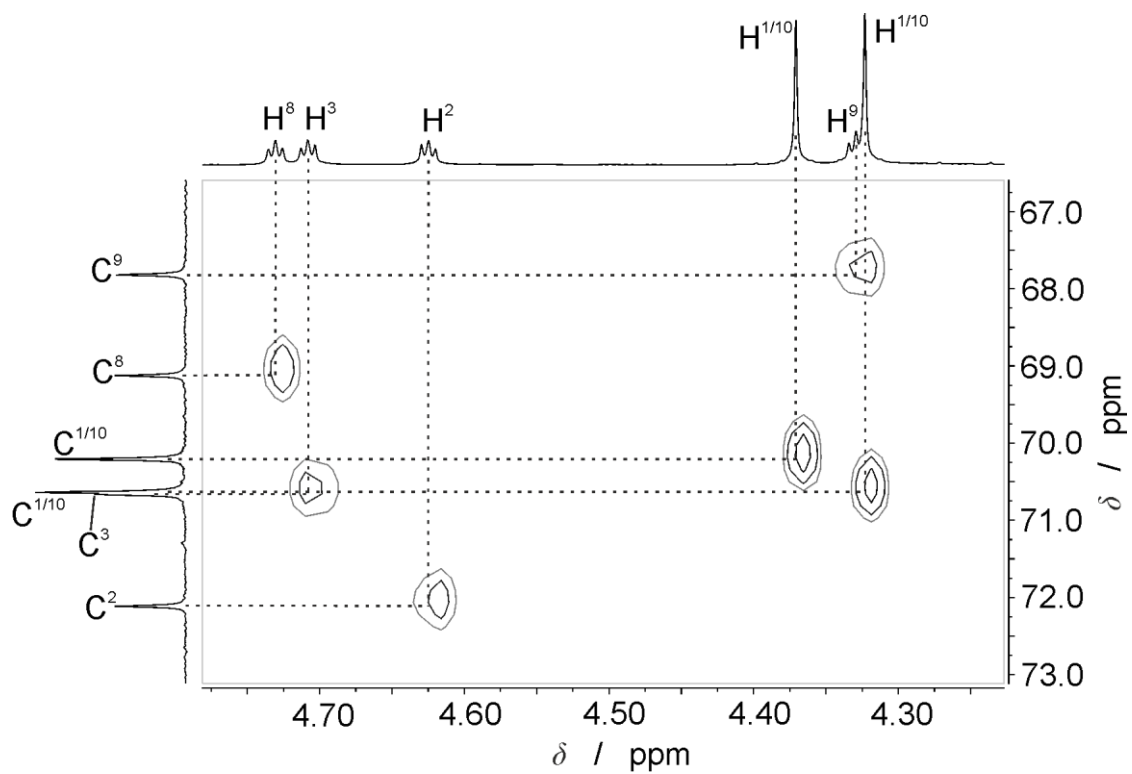

**Figure S6:**  $^{13}\text{C}$ - $^1\text{H}$  HSQC of  $\text{W}(\text{CO})_5(\text{E-2})$  in  $\text{CD}_2\text{Cl}_2$ .

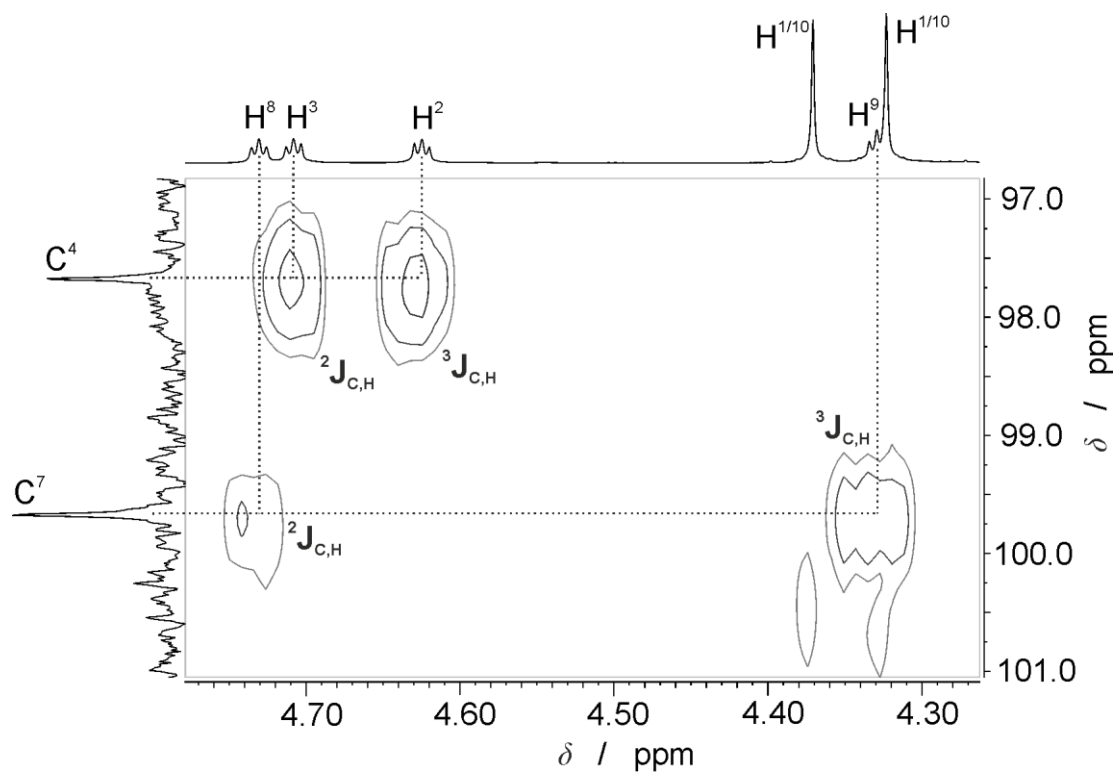

**Figure S7:**  $^{13}\text{C}$ - $^1\text{H}$  HMBC of  $\text{W}(\text{CO})_5(\text{E-2})$  in  $\text{CD}_2\text{Cl}_2$ .

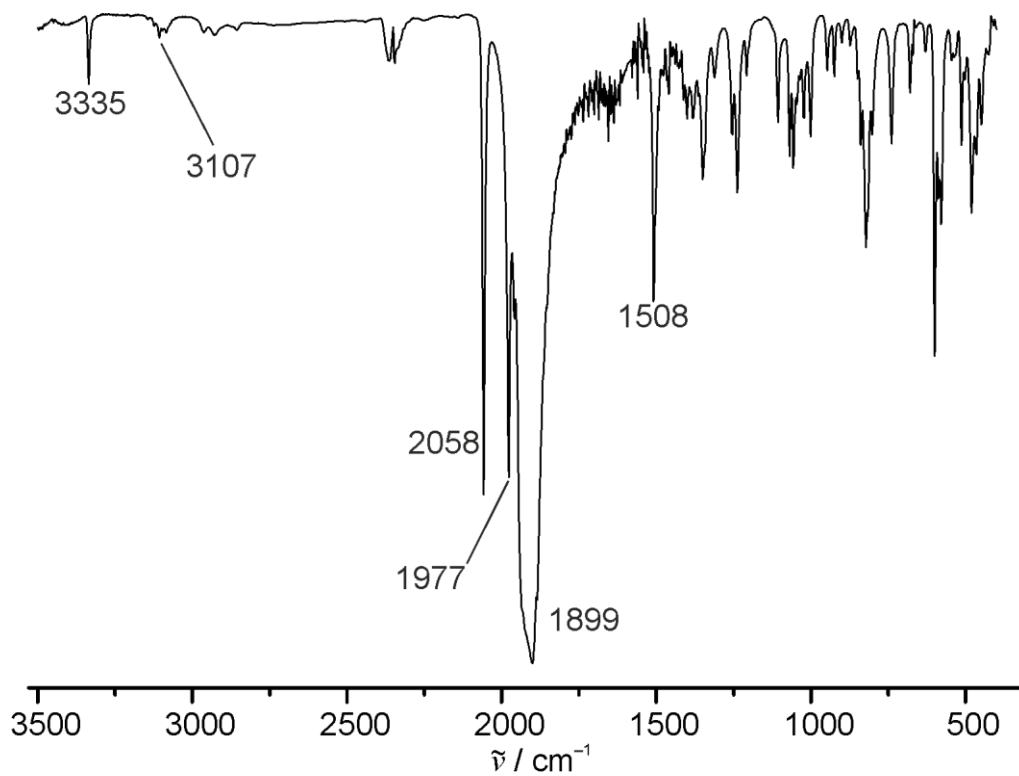

**Figure S8:** IR spectrum of  $\text{W}(\text{CO})_5(\text{E-2})$  as KBr disk.

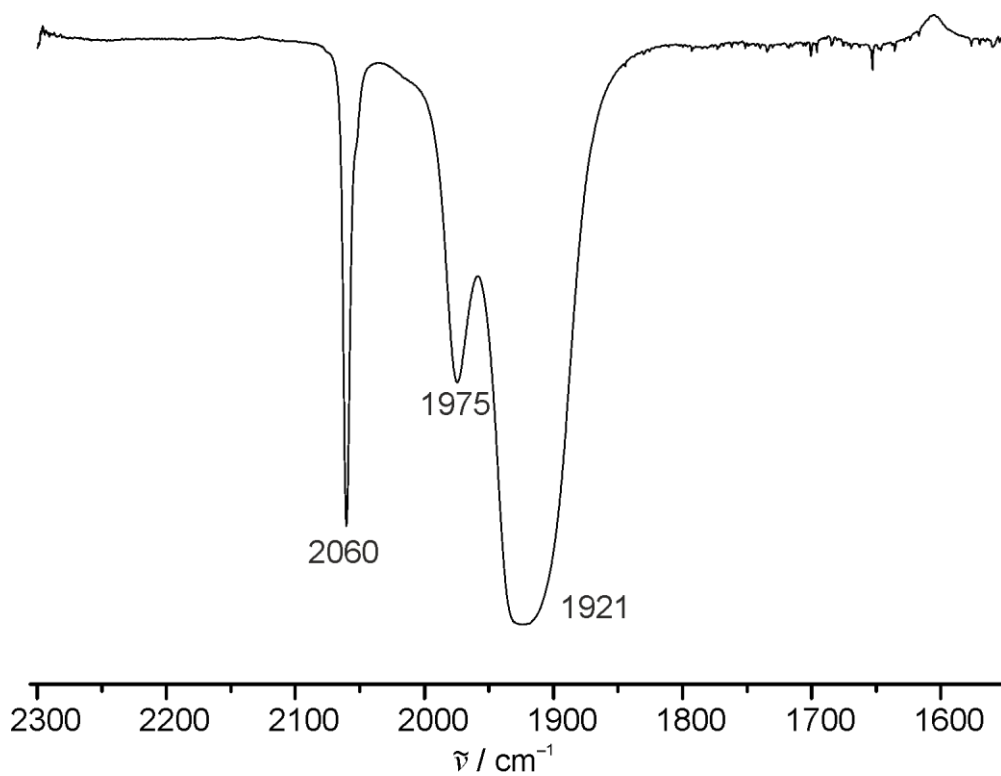

**Figure S9:** IR spectrum of  $\text{W}(\text{CO})_5(\text{E-2})$  in  $\text{CH}_2\text{Cl}_2$  (CO region).

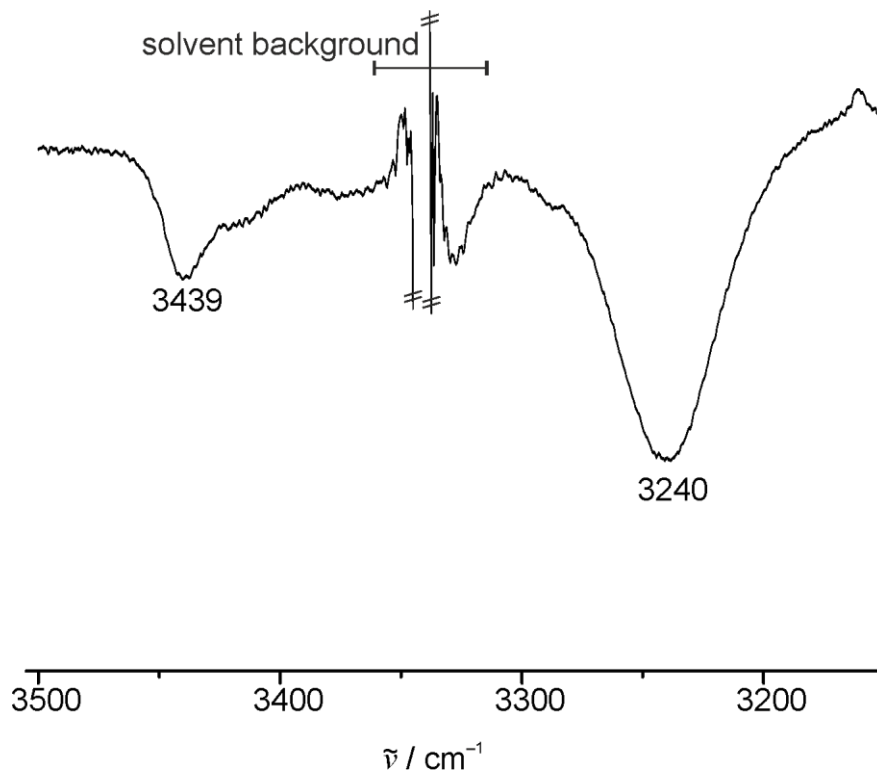

**Figure S10:** IR spectrum of  $\text{W}(\text{CO})_5(\text{E-2})$  in  $\text{CD}_2\text{Cl}_2$  (NH region).

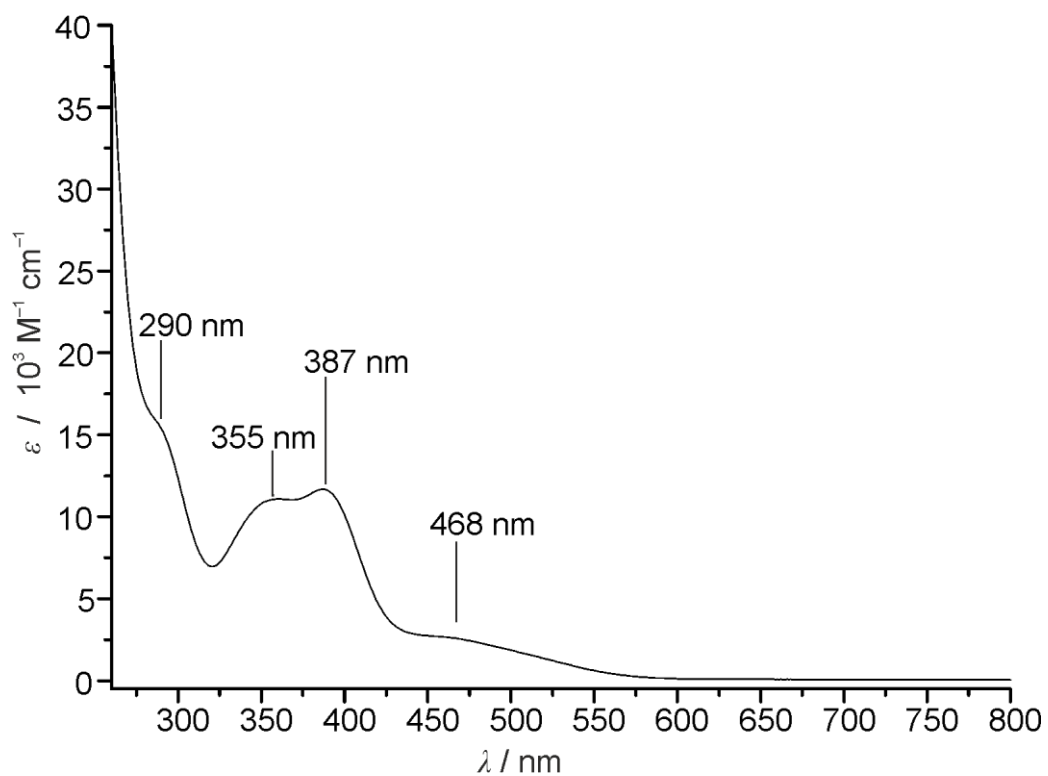

**Figure S11:** UV-vis spectrum of  $\text{W}(\text{CO})_5(\text{E-2})$  in  $\text{CH}_2\text{Cl}_2$ .

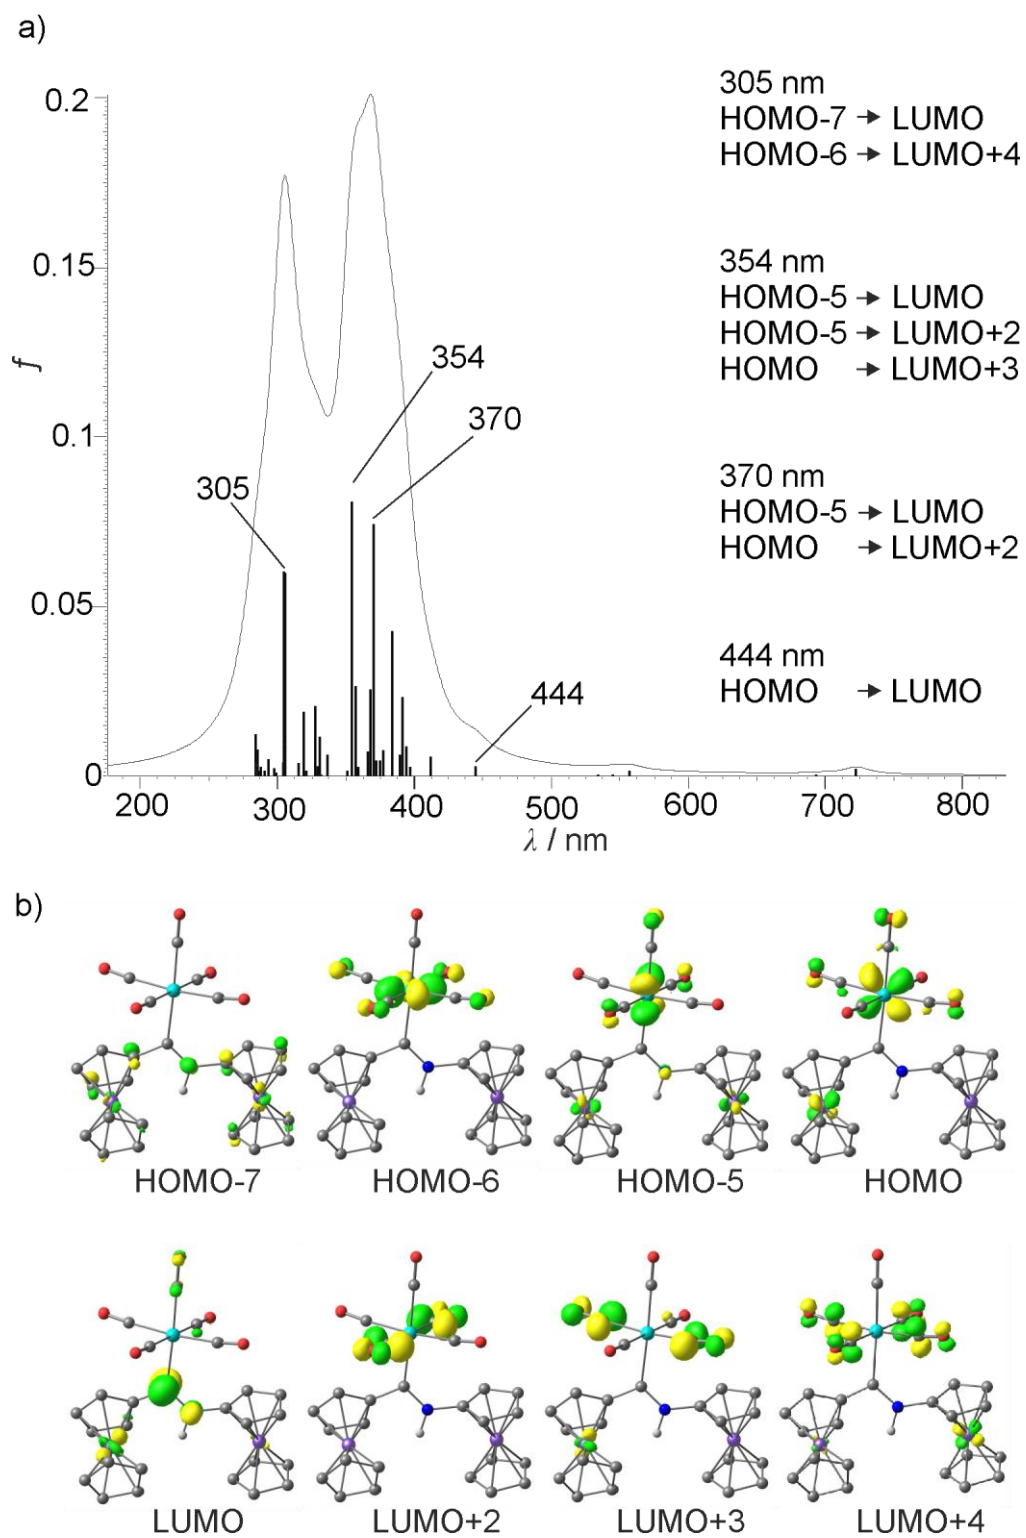

**Figure S12:** (a) TD-DFT calculated UV/Vis spectrum of **W(CO)<sub>5</sub>(E-2)** with major orbital contributions to the indicated transitions and (b) corresponding orbitals (isosurface values 0.08 a.u.).



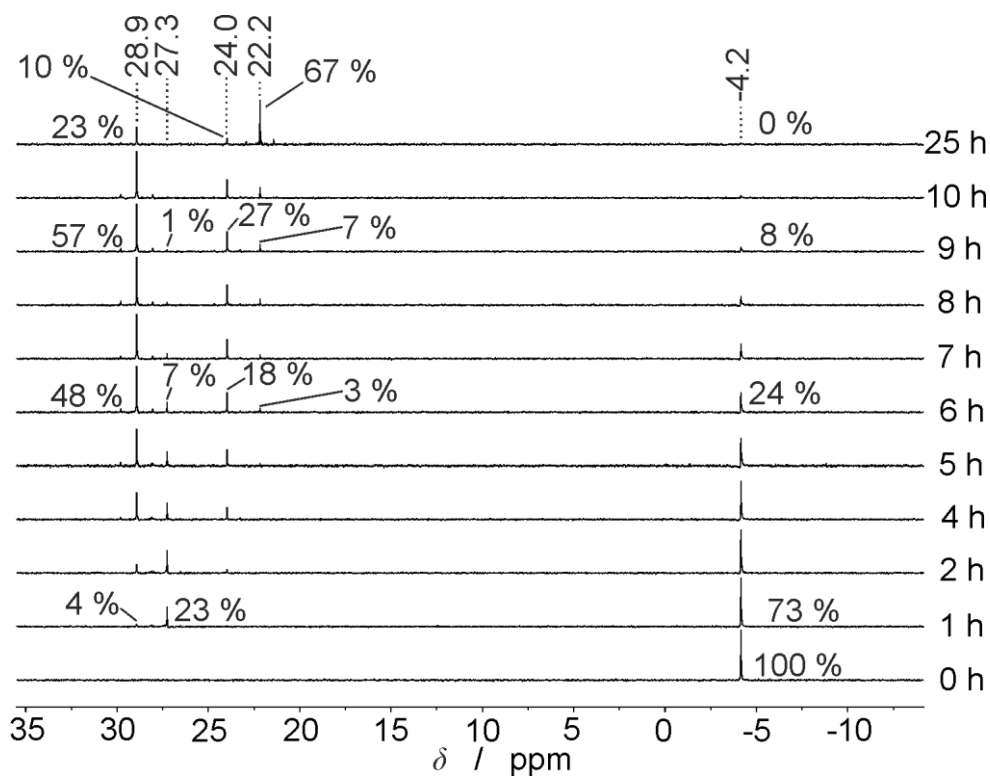

**Figure S13:**  $^{31}\text{P}\{^1\text{H}\}$  NMR spectra of a solution of  $\text{W}(\text{CO})_5(\text{E-2})$  and 1 equiv  $\text{PPh}_3$  in  $d_8$ -toluene during heating to 100 °C.

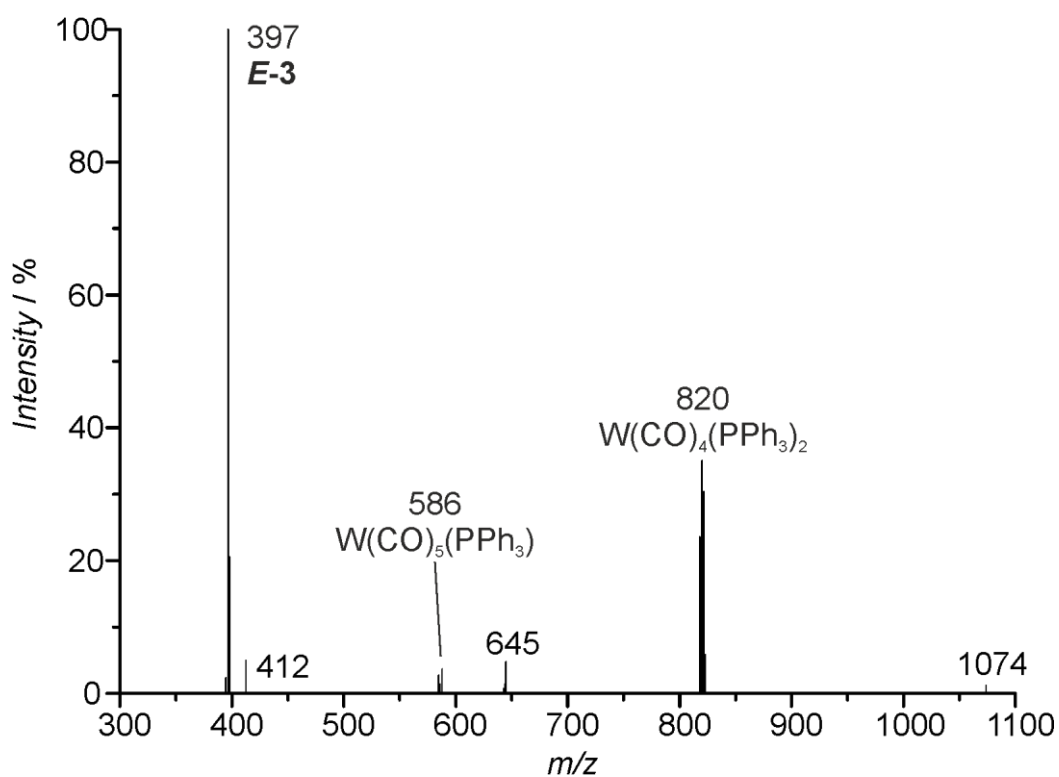

**Figure S14:** FD mass spectrum of a solution of  $\text{W}(\text{CO})_5(\text{E-2})$  and 1 equiv  $\text{PPh}_3$  in  $d_8$ -toluene after heating to 100 °C for 25 h.

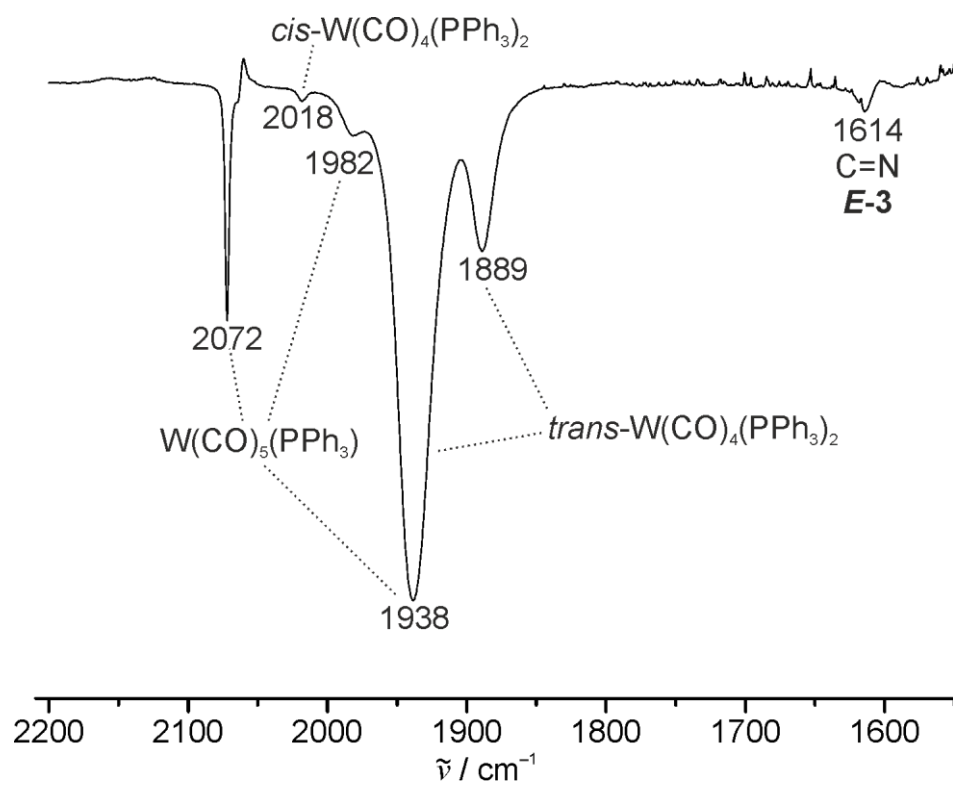

**Figure S15:** IR spectrum of a solution of  $\text{W}(\text{CO})_5(\text{E-2})$  and 1 equiv  $\text{PPh}_3$  in  $d_8$ -toluene after heating to 100 °C for 25 h.

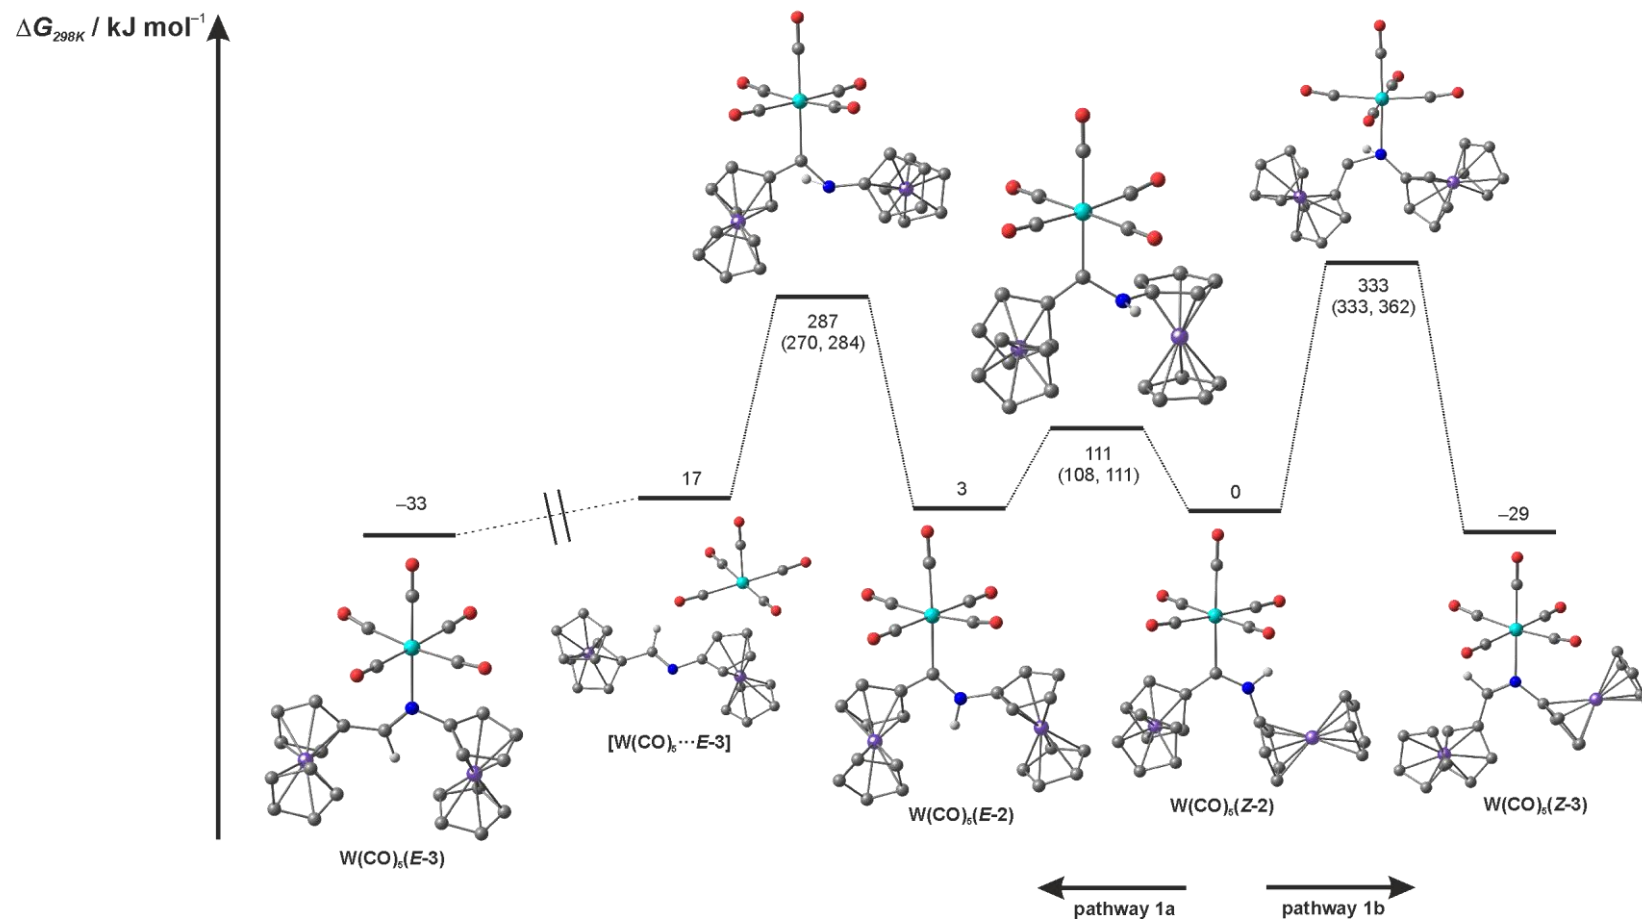

**Figure S16:** DFT calculated reaction pathway 1a from  $W(CO)_5(Z-2)$  to  $W(CO)_5(E-3)$  (left) and pathway 1b from  $W(CO)_5(Z-2)$  to  $W(CO)_5(Z-3)$  (right).

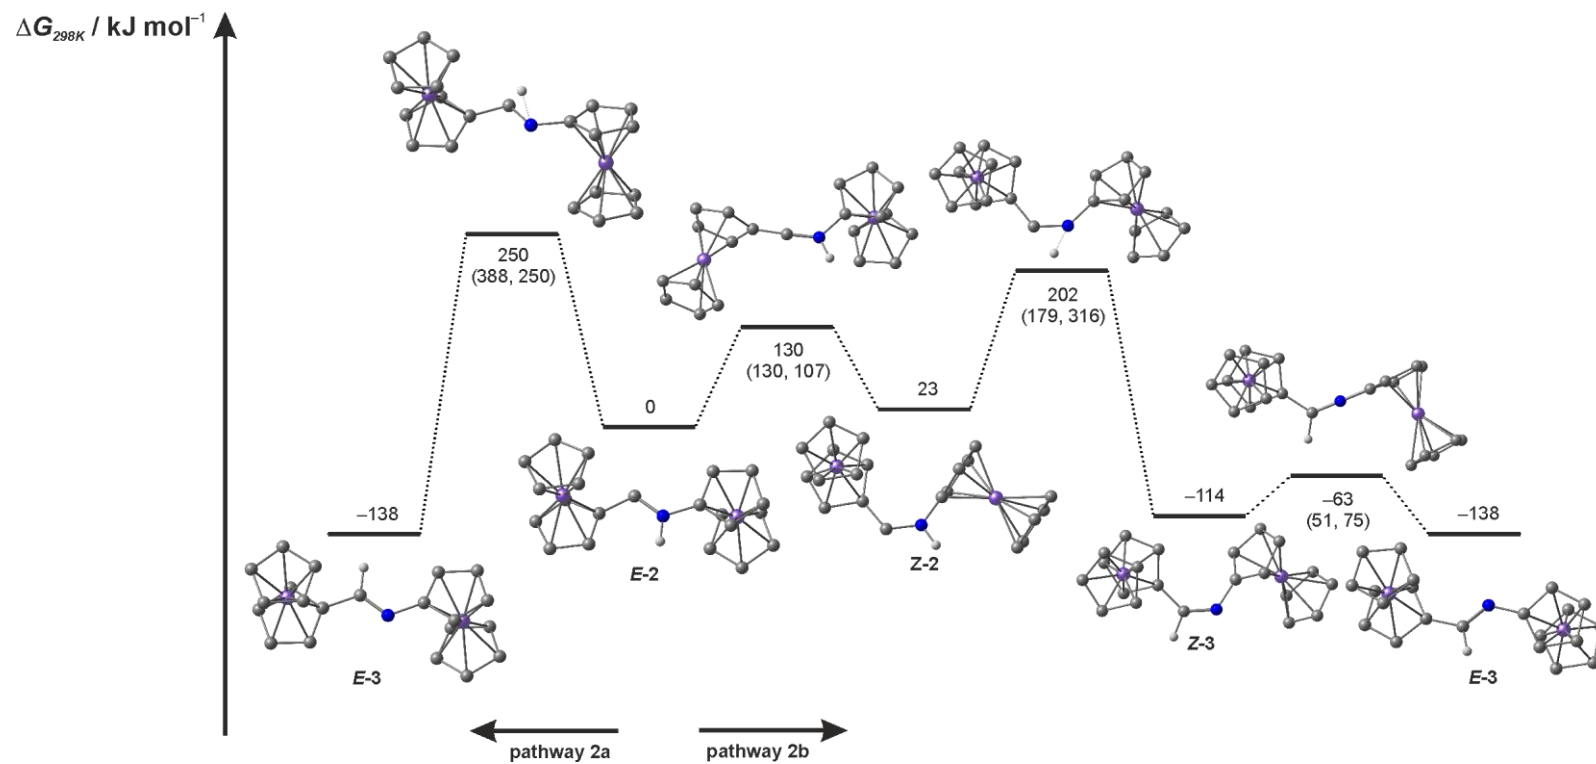

**Figure S17:** DFT calculated reaction pathway 2a from carbene **E-2** to imine **E-3** (left) and pathway 2b from carbene **E-2** to imine **E-3** via imine **Z-3** (right).

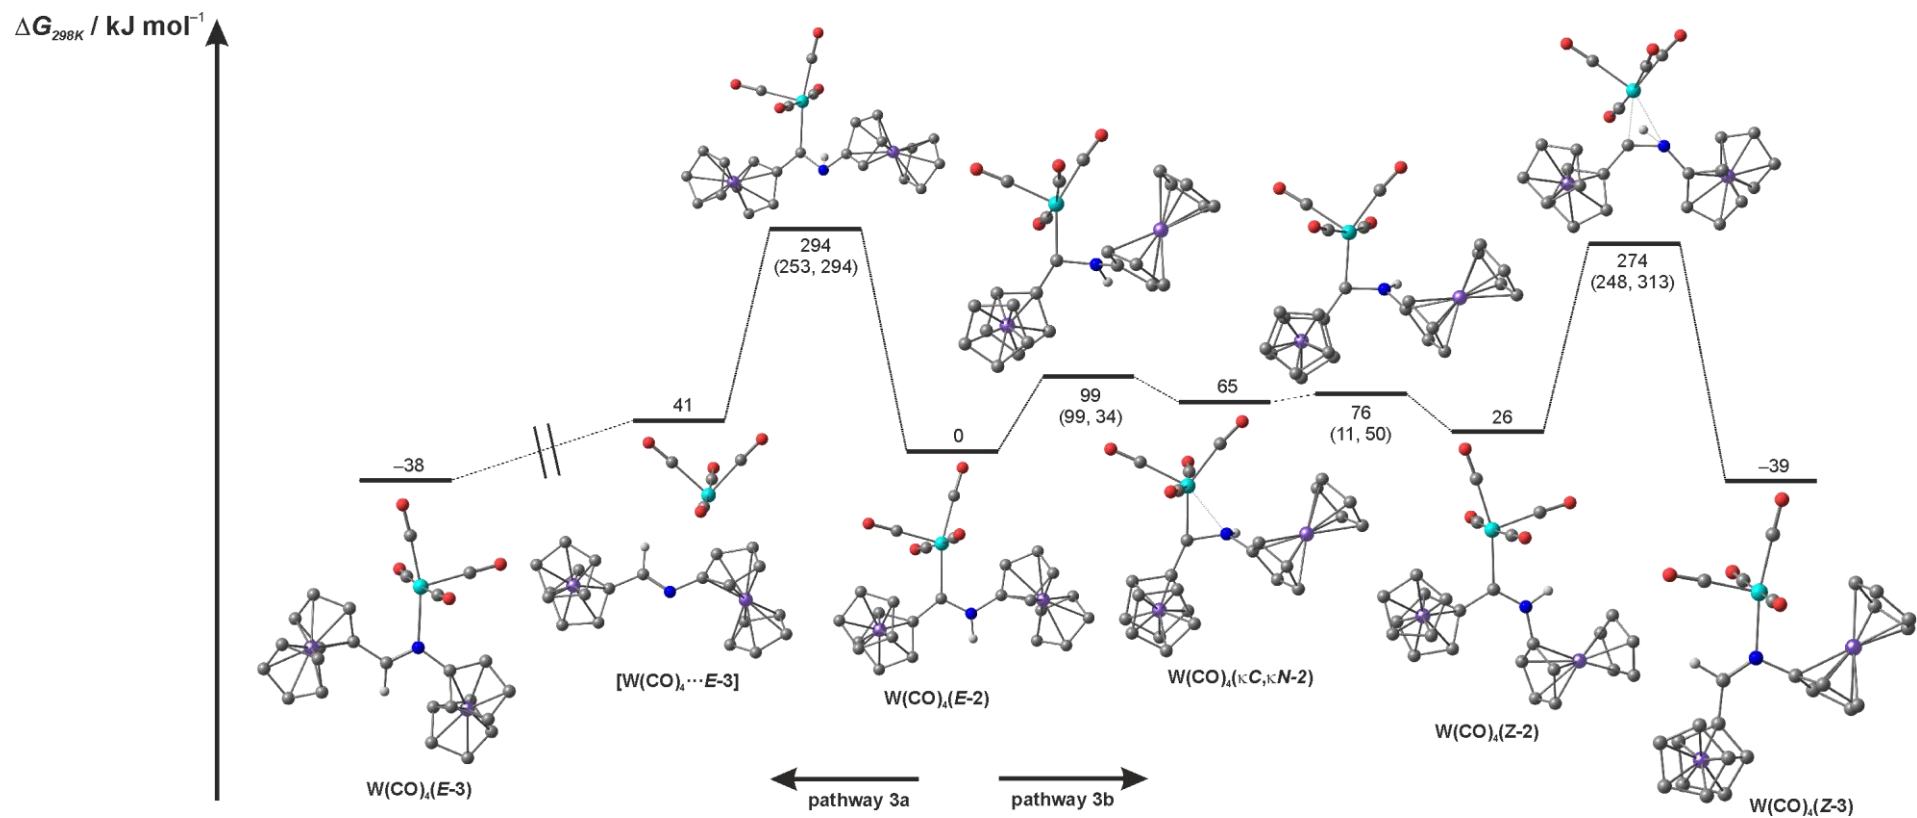

**Figure S18:** DFT calculated reaction pathway 3a from  $\text{W}(\text{CO})_4(\text{E-2})$  to  $\text{W}(\text{CO})_4(\text{E-3})$  (left) and pathway 3b  $\text{W}(\text{CO})_4(\text{E-2})$  to  $\text{W}(\text{CO})_4(\text{Z-3})$  (right).

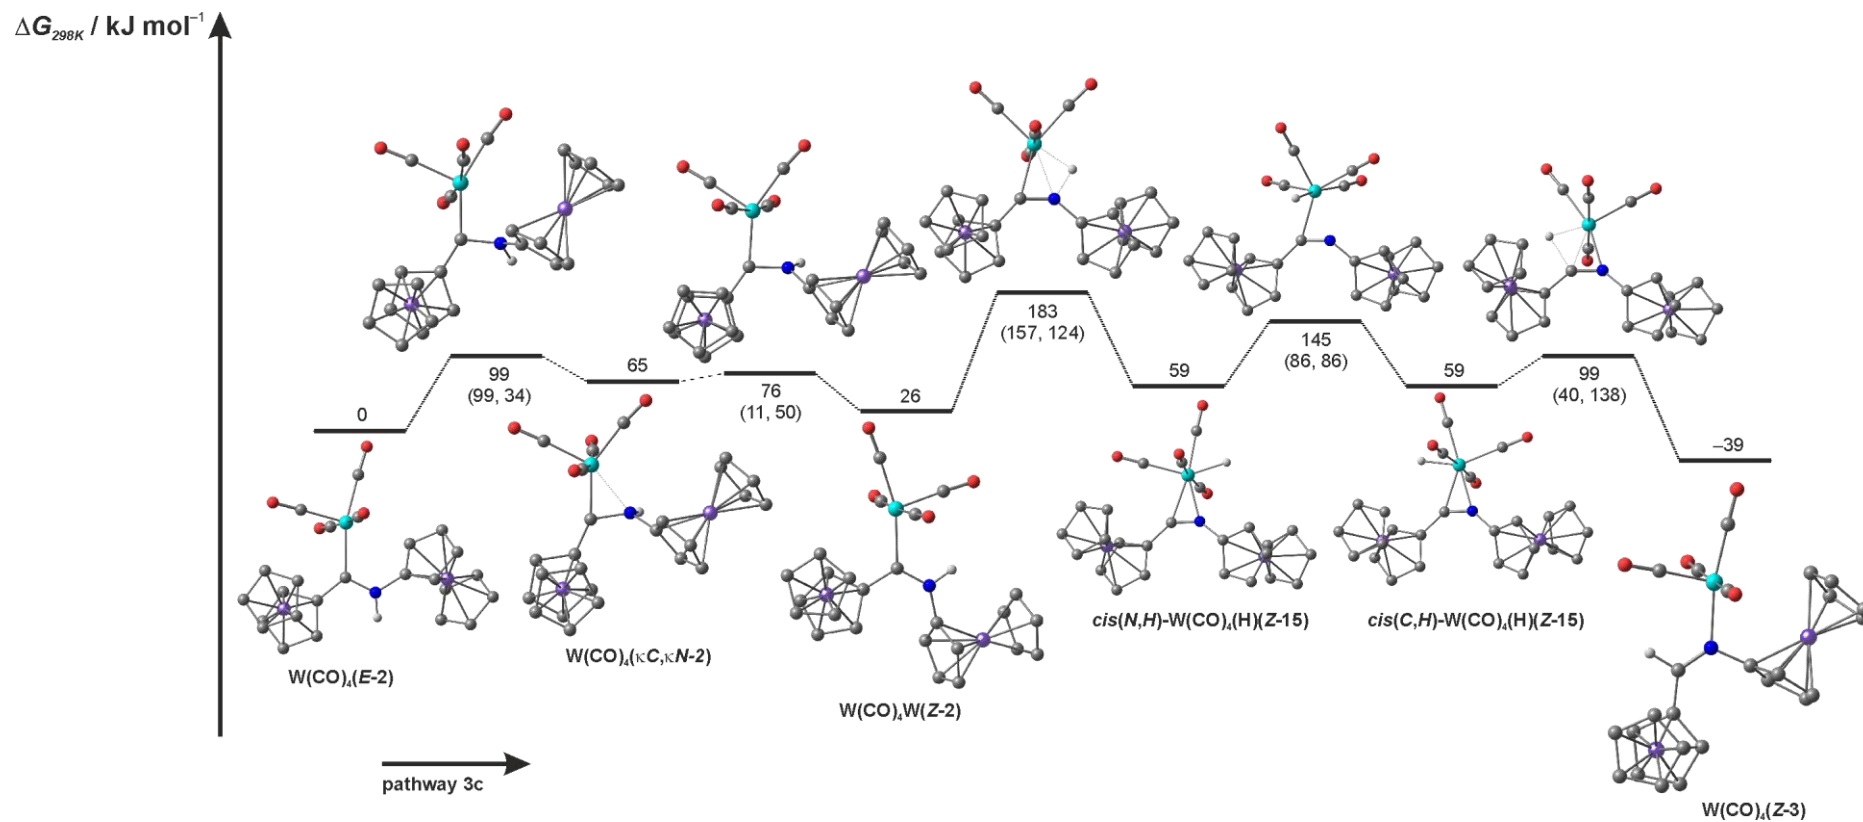

**Figure S19:** DFT calculated reaction pathway 3c from  $\text{W(CO)}_4(\text{E-2})$  to  $\text{W(CO)}_4(\text{Z-3})$  via oxidative addition/reductive elimination.

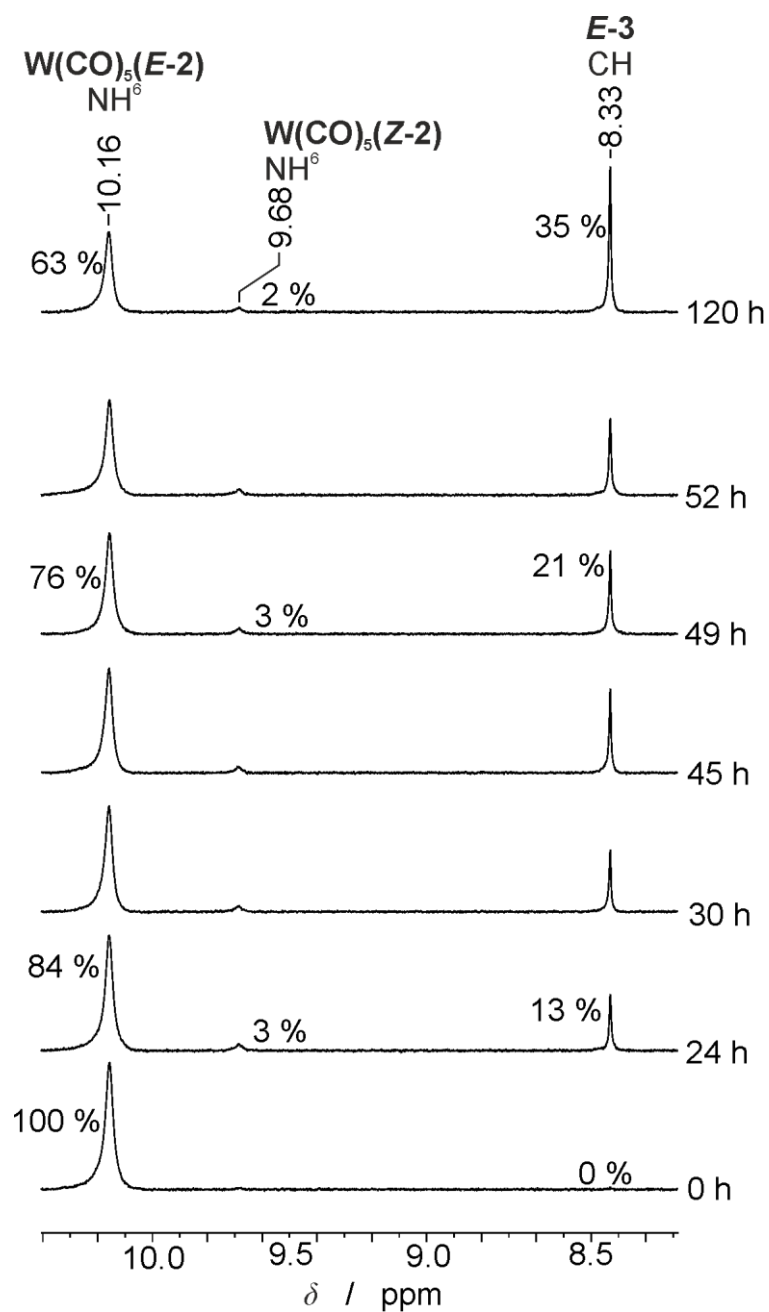

**Figure S20:**  $^1\text{H}$  NMR spectroscopic reaction monitoring of the thermolysis of  $\text{W}(\text{CO})_5(\text{E-2})$  in  $\text{d}_8$ -toluene at  $60\text{ }^\circ\text{C}$ .

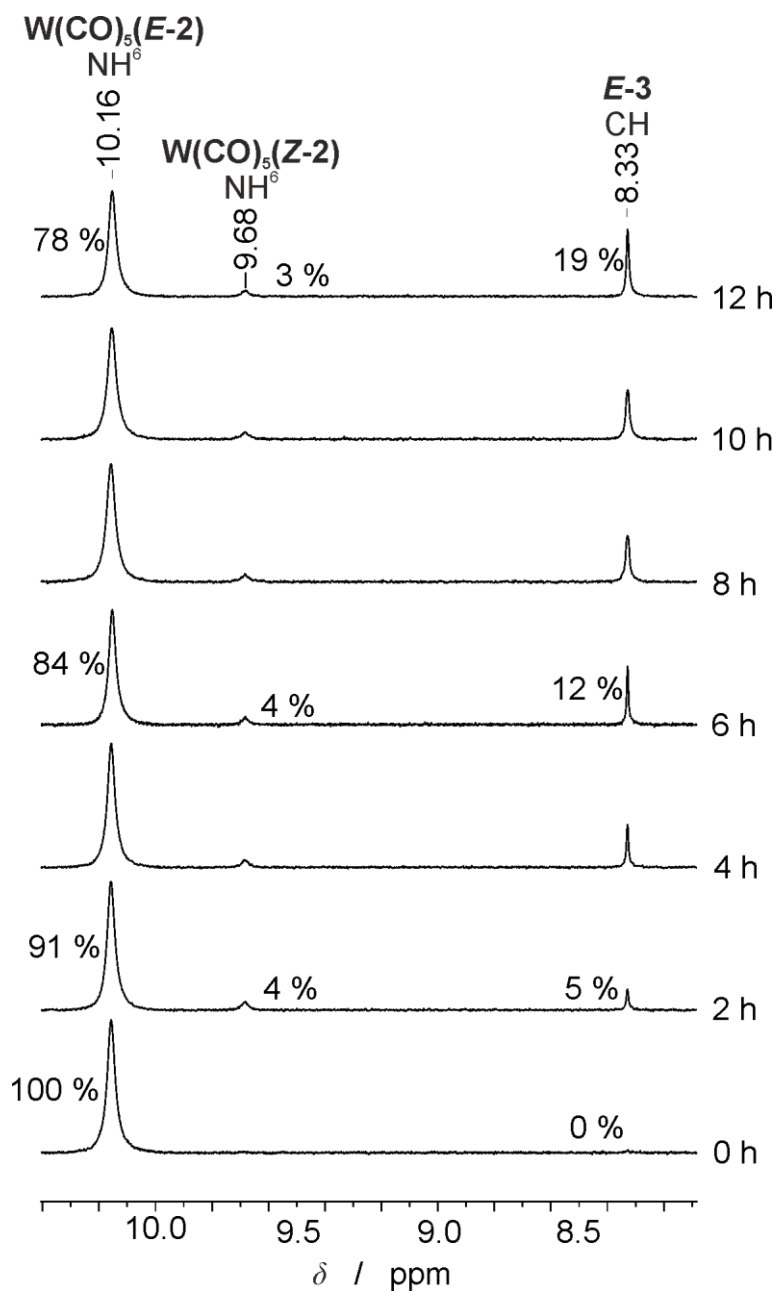

**Figure S21:** <sup>1</sup>H NMR spectroscopic reaction monitoring of the thermolysis of **W(CO)<sub>5</sub>(E-2)** in d<sub>8</sub>-toluene at 70 °C.



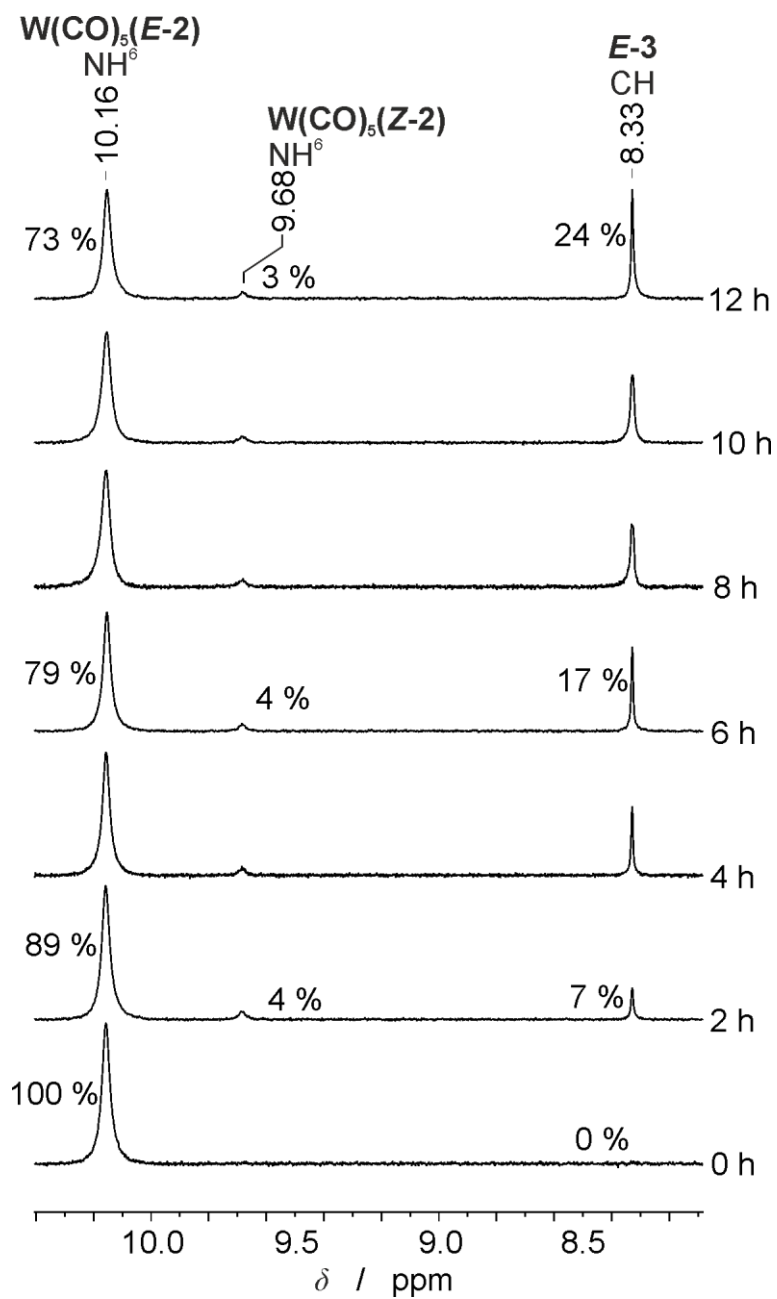

**Figure S22:**  $^1H$  NMR spectroscopic reaction monitoring of the thermolysis of  $W(CO)_5(E-2)$  in  $d_8$ -toluene at 80 °C.

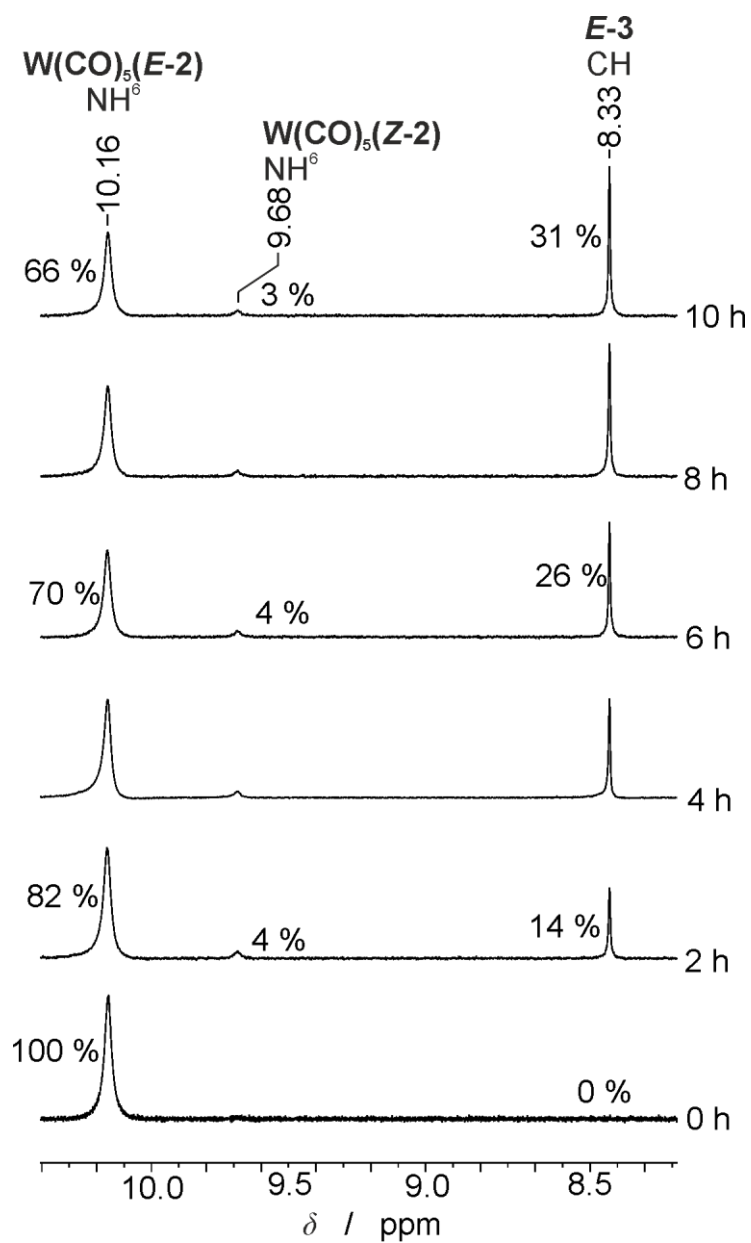

**Figure S23:**  $^1\text{H}$  NMR spectroscopic reaction monitoring of the thermolysis of  $\text{W}(\text{CO})_5(\text{E-2})$  in  $d_8$ -toluene at  $90^\circ\text{C}$ .

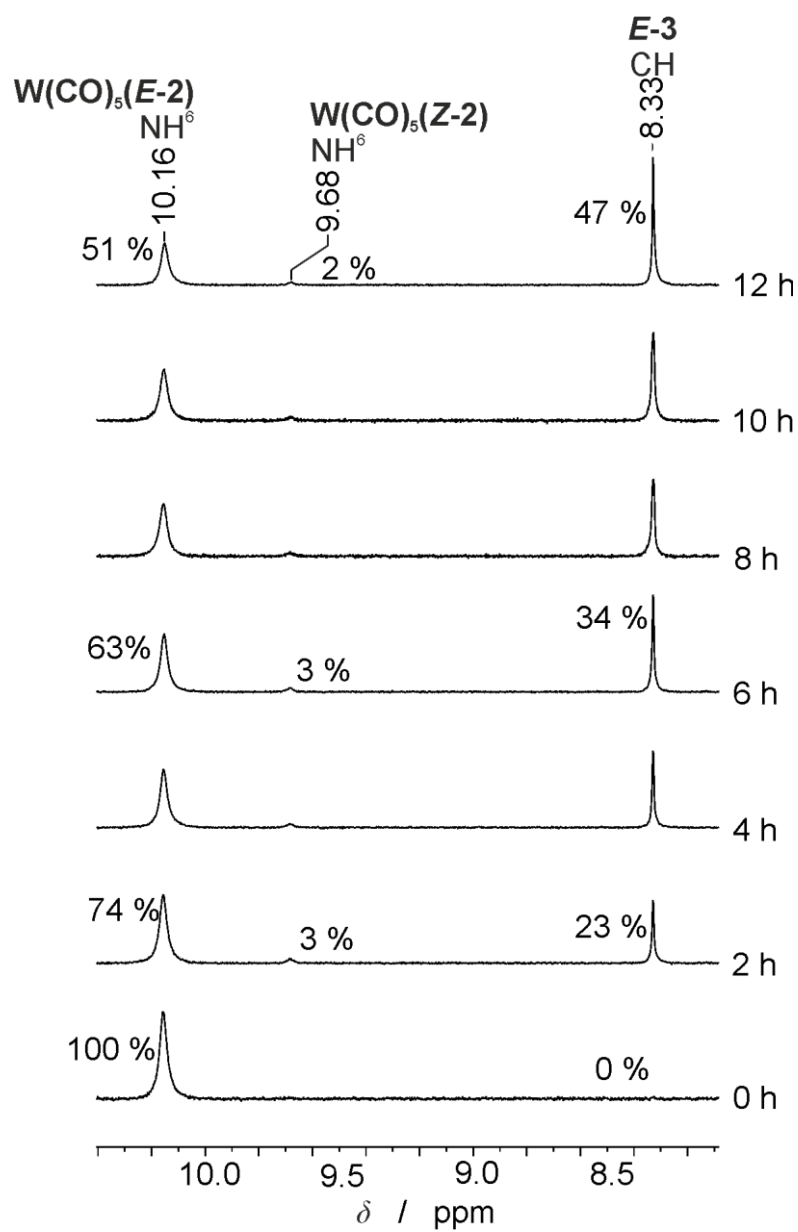

**Figure S24:**  $^1H$  NMR spectroscopic reaction monitoring of the thermolysis of  $W(CO)_5(E-2)$  in  $d_8$ -toluene at 100 °C.

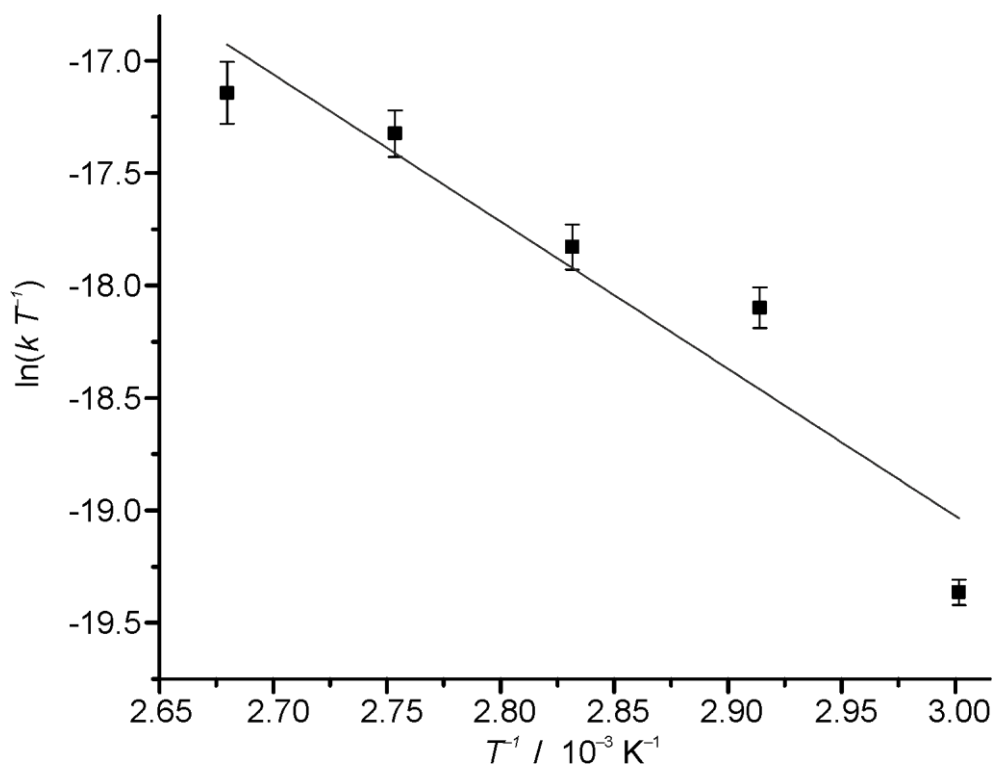

**Figure S25:** Eyring analysis of the  $^1\text{H}$  NMR spectroscopic reaction monitoring of the thermolysis of  $\text{W}(\text{CO})_5(\text{E-2})$  in  $d_8$ -toluene at 60 °C, 70 °C, 80 °C, 90 °C and 100 °C.

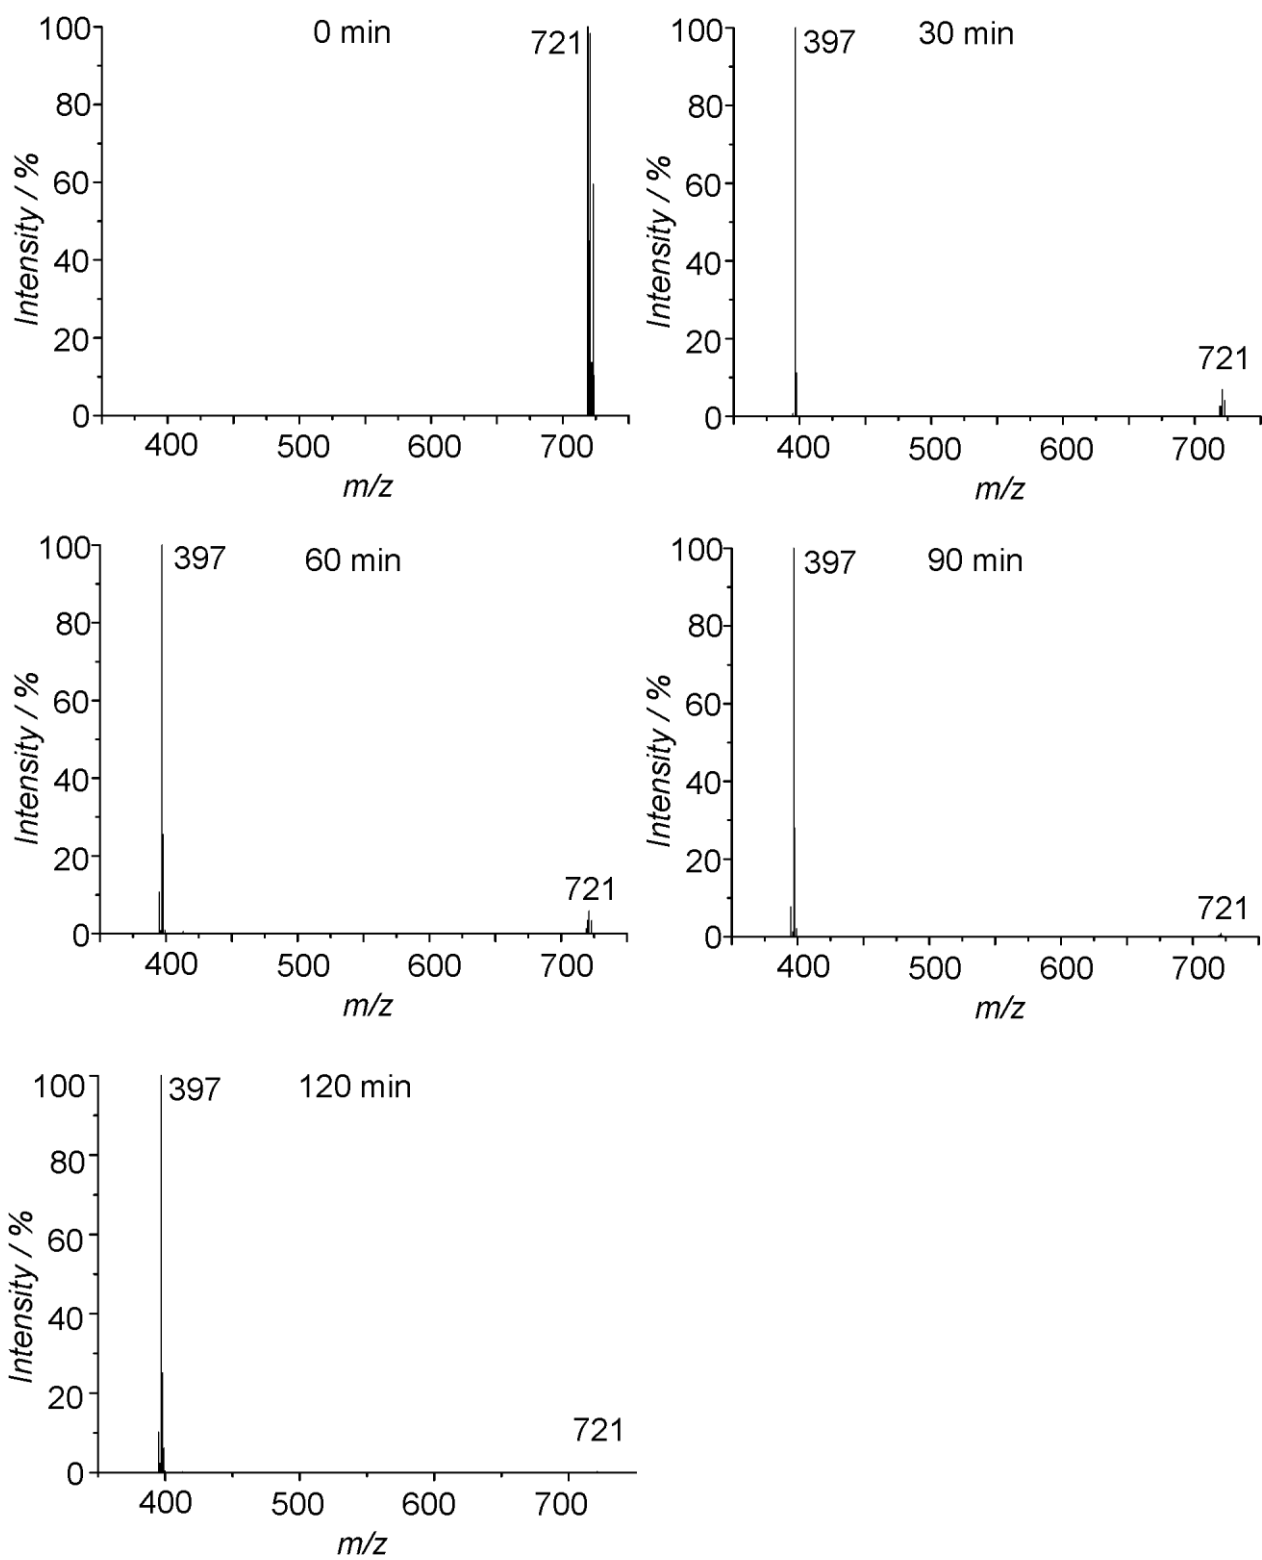

**Figure S26:** FD mass spectrometric reaction monitoring of the thermolysis of  $W(CO)_5(E-2)$  in toluene at 100 °C.

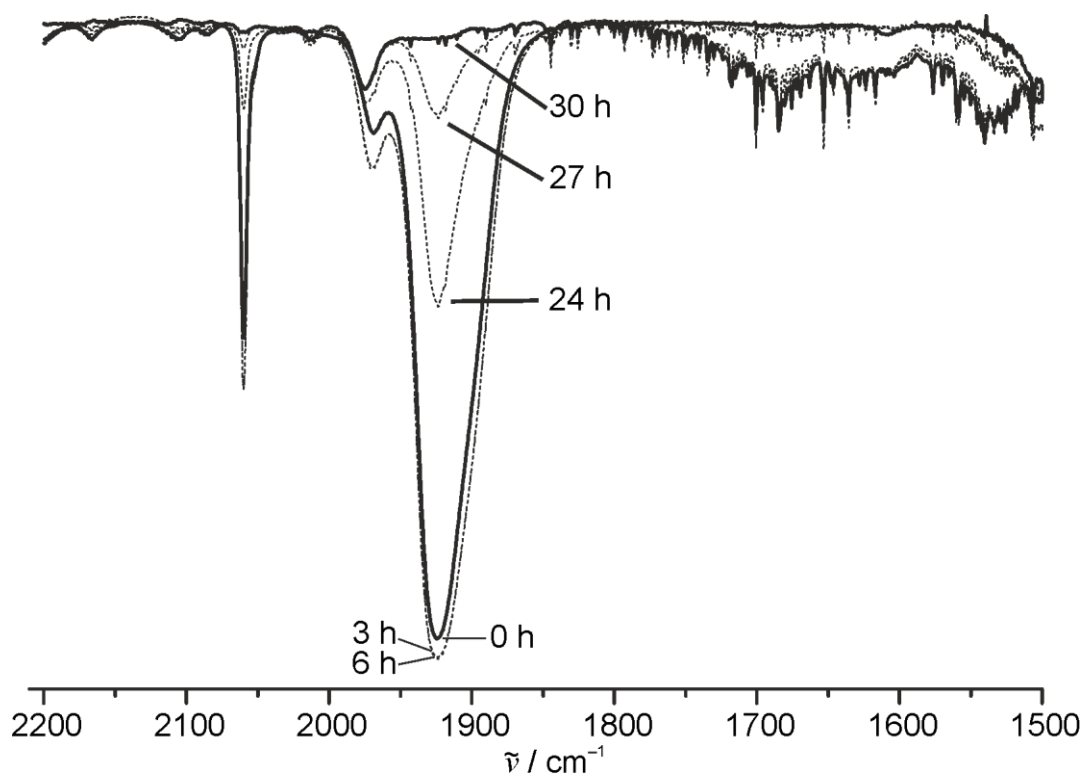

**Figure S27:** IR spectroscopic reaction monitoring of the thermolysis of  $\text{W}(\text{CO})_5(\text{E-2})$  in 1,2-dichloroethane at 84 °C.

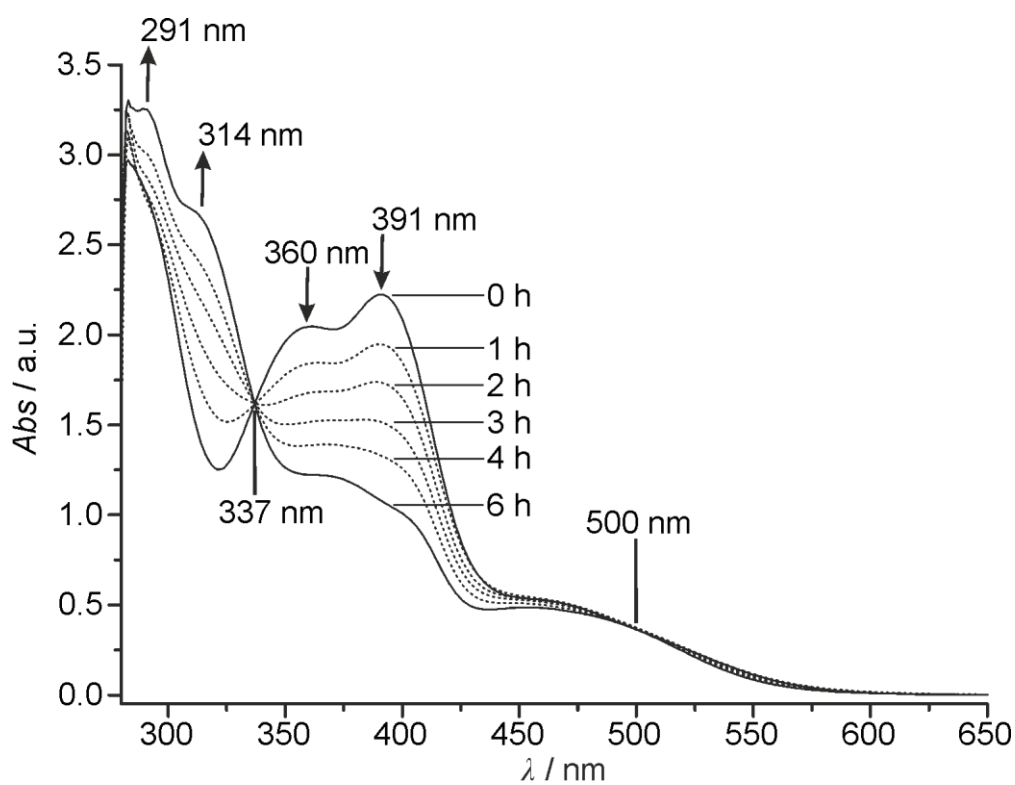

**Figure S28:** UV-vis spectroscopic reaction monitoring of the thermolysis of  $\text{W}(\text{CO})_5(\text{E-2})$  in toluene at 100 °C.

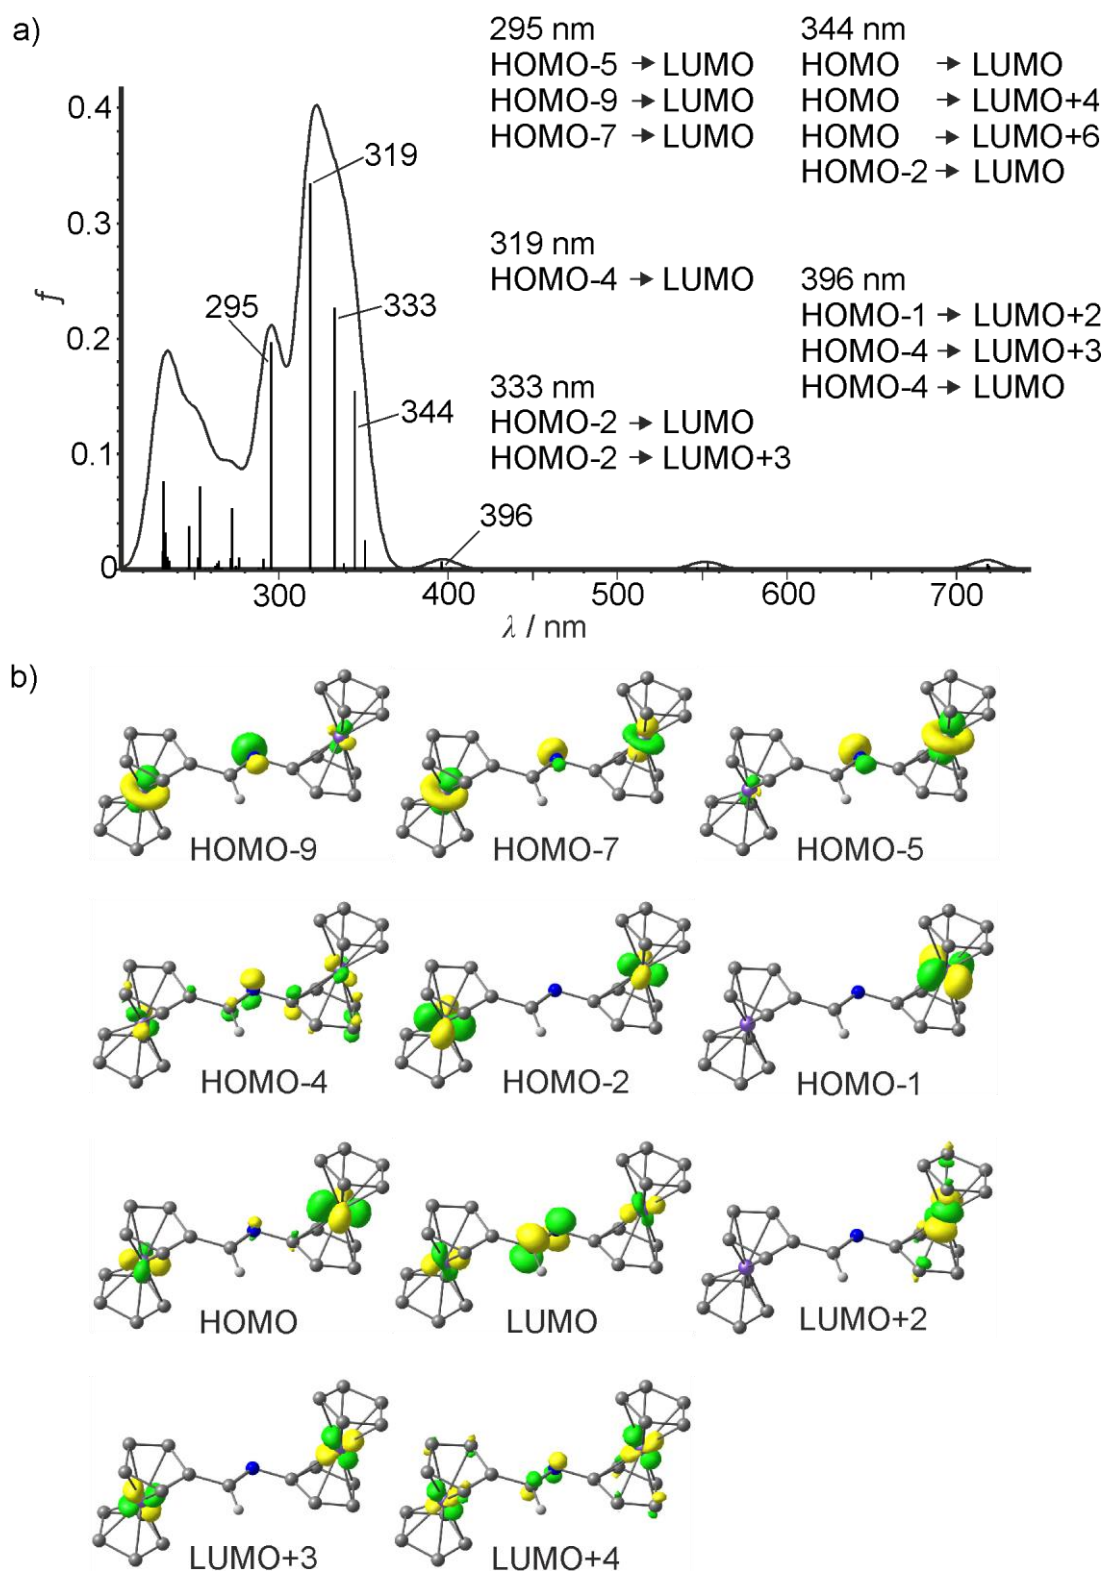

**Figure S29:** (a) TD-DFT calculated UV-vis spectrum of *E-3* with major orbital contributions to the indicated transitions and (b) corresponding orbitals (isosurface values 0.08 a.u.).

## Cartesian Coordinates of DFT calculated structures

### **E-2**

|    |              |              |              |
|----|--------------|--------------|--------------|
| Fe | -3.543162000 | 0.176245000  | 0.004948000  |
| Fe | 3.555481000  | -0.185262000 | 0.002842000  |
| C  | -0.429386000 | 0.219846000  | 0.534909000  |
| C  | -1.597273000 | 0.990936000  | 0.091232000  |
| C  | -2.472624000 | 1.673695000  | 1.030899000  |
| H  | -2.310549000 | 1.701416000  | 2.098780000  |
| C  | -3.543183000 | 2.289948000  | 0.301749000  |
| H  | -4.351478000 | 2.870351000  | 0.723778000  |
| C  | -3.362492000 | 1.987416000  | -1.100792000 |
| H  | -4.017379000 | 2.297008000  | -1.903873000 |
| C  | -2.176587000 | 1.190098000  | -1.240650000 |
| H  | -1.806479000 | 0.794182000  | -2.177727000 |
| C  | -3.472072000 | -1.896325000 | 0.469734000  |
| H  | -2.566381000 | -2.433218000 | 0.714440000  |
| C  | -4.017671000 | -1.706523000 | -0.852268000 |
| H  | -3.605521000 | -2.096925000 | -1.772464000 |
| C  | -5.212046000 | -0.903025000 | -0.730284000 |
| H  | -5.848737000 | -0.581891000 | -1.543059000 |
| C  | -5.401673000 | -0.596933000 | 0.667411000  |
| H  | -6.203034000 | -0.002412000 | 1.083806000  |
| C  | -4.324111000 | -1.208006000 | 1.408857000  |
| H  | -4.175111000 | -1.154235000 | 2.478035000  |
| C  | 1.570708000  | -0.905327000 | -0.295616000 |
| C  | 2.093744000  | -1.404843000 | 0.947980000  |
| H  | 1.650776000  | -1.231294000 | 1.915626000  |
| C  | 3.271666000  | -2.179790000 | 0.643123000  |
| H  | 3.893247000  | -2.691307000 | 1.364442000  |
| C  | 3.481691000  | -2.143001000 | -0.784429000 |
| H  | 4.282508000  | -2.625896000 | -1.326157000 |
| C  | 2.430611000  | -1.343280000 | -1.368405000 |
| H  | 2.296758000  | -1.133183000 | -2.421105000 |
| C  | 3.537025000  | 1.932951000  | 0.027050000  |
| H  | 2.657472000  | 2.543605000  | -0.122915000 |
| C  | 4.434229000  | 1.462693000  | -1.002541000 |
| H  | 4.350913000  | 1.667509000  | -2.061033000 |
| C  | 5.462375000  | 0.669946000  | -0.371208000 |
| H  | 6.280371000  | 0.172690000  | -0.873999000 |
| C  | 5.200183000  | 0.649482000  | 1.048527000  |
| H  | 5.785597000  | 0.131644000  | 1.795617000  |
| C  | 4.010234000  | 1.429932000  | 1.293965000  |
| H  | 3.544516000  | 1.596139000  | 2.255239000  |
| N  | 0.386235000  | -0.139714000 | -0.470760000 |
| H  | 0.218480000  | 0.128908000  | -1.450103000 |

### **Z-2**

|    |              |              |              |
|----|--------------|--------------|--------------|
| Fe | 3.237542000  | -0.011804000 | -0.013216000 |
| Fe | -3.238681000 | 0.049308000  | -0.189018000 |
| C  | 0.740543000  | -0.528526000 | 1.808891000  |



|   |              |              |              |
|---|--------------|--------------|--------------|
| C | 1.639267000  | -1.119404000 | 0.807656000  |
| C | 2.918220000  | -1.664227000 | 1.252150000  |
| H | 3.219846000  | -1.712699000 | 2.288257000  |
| C | 3.663378000  | -2.101295000 | 0.110119000  |
| H | 4.647756000  | -2.547985000 | 0.121678000  |
| C | 2.871184000  | -1.827116000 | -1.068840000 |
| H | 3.167215000  | -2.028252000 | -2.089490000 |
| C | 1.634779000  | -1.229546000 | -0.656014000 |
| H | 0.848019000  | -0.908962000 | -1.319891000 |
| C | 3.086130000  | 2.013411000  | 0.602992000  |
| H | 2.312156000  | 2.387101000  | 1.258317000  |
| C | 3.015950000  | 1.929247000  | -0.836156000 |
| H | 2.189191000  | 2.251544000  | -1.453541000 |
| C | 4.243733000  | 1.331200000  | -1.306921000 |
| H | 4.496619000  | 1.125312000  | -2.337731000 |
| C | 5.069382000  | 1.045615000  | -0.157944000 |
| H | 6.048476000  | 0.587119000  | -0.177786000 |
| C | 4.352793000  | 1.465560000  | 1.023166000  |
| H | 4.697282000  | 1.376359000  | 2.043756000  |
| C | -1.188497000 | -0.276152000 | 0.163915000  |
| C | -1.352044000 | 0.788758000  | -0.798431000 |
| H | -1.003396000 | 1.804748000  | -0.677393000 |
| C | -2.051178000 | 0.244672000  | -1.935900000 |
| H | -2.334621000 | 0.788835000  | -2.825923000 |
| C | -2.315047000 | -1.151653000 | -1.675909000 |
| H | -2.831905000 | -1.833214000 | -2.336697000 |
| C | -1.783534000 | -1.475616000 | -0.376206000 |
| H | -1.808461000 | -2.438591000 | 0.113616000  |
| C | -4.203892000 | 0.548261000  | 1.630304000  |
| H | -3.735612000 | 0.619844000  | 2.602833000  |
| C | -4.804333000 | -0.636705000 | 1.064660000  |
| H | -4.848797000 | -1.610772000 | 1.531615000  |
| C | -5.330073000 | -0.292972000 | -0.234801000 |
| H | -5.830720000 | -0.967220000 | -0.915766000 |
| C | -5.055674000 | 1.104249000  | -0.472261000 |
| H | -5.316534000 | 1.661096000  | -1.361565000 |
| C | -4.359909000 | 1.624589000  | 0.680291000  |
| H | -4.015384000 | 2.641287000  | 0.809011000  |
| N | -0.507233000 | -0.166804000 | 1.436868000  |
| H | -1.067946000 | 0.242889000  | 2.178160000  |

### **E-3**

|    |              |              |              |
|----|--------------|--------------|--------------|
| Fe | 3.561997000  | 0.179846000  | 0.012418000  |
| Fe | -3.565445000 | -0.182186000 | 0.009169000  |
| C  | 0.431624000  | 0.172932000  | -0.628213000 |
| C  | 1.623336000  | 0.968180000  | -0.352840000 |
| C  | 2.561084000  | 1.443426000  | -1.353801000 |
| H  | 2.480627000  | 1.280258000  | -2.420128000 |
| C  | 3.594712000  | 2.185254000  | -0.682271000 |
| H  | 4.435981000  | 2.672516000  | -1.154670000 |
| C  | 3.311399000  | 2.161988000  | 0.735325000  |

|   |              |              |              |
|---|--------------|--------------|--------------|
| H | 3.909558000  | 2.624528000  | 1.507867000  |
| C | 2.104321000  | 1.407999000  | 0.940972000  |
| H | 1.619062000  | 1.201999000  | 1.883294000  |
| C | 3.497879000  | -1.941293000 | -0.038523000 |
| H | 2.608981000  | -2.523318000 | -0.238879000 |
| C | 3.938069000  | -1.491706000 | 1.259603000  |
| H | 3.441196000  | -1.685097000 | 2.199918000  |
| C | 5.150881000  | -0.728309000 | 1.078877000  |
| H | 5.721899000  | -0.248039000 | 1.861279000  |
| C | 5.457769000  | -0.705130000 | -0.331474000 |
| H | 6.300493000  | -0.206561000 | -0.790041000 |
| C | 4.434799000  | -1.453710000 | -1.022895000 |
| H | 4.380882000  | -1.620291000 | -2.089808000 |
| C | -1.567470000 | -0.913919000 | 0.009740000  |
| C | -2.212654000 | -1.184760000 | -1.267452000 |
| H | -1.900753000 | -0.823329000 | -2.237397000 |
| C | -3.356748000 | -2.022929000 | -1.015198000 |
| H | -4.044078000 | -2.396345000 | -1.761771000 |
| C | -3.438840000 | -2.261041000 | 0.407440000  |
| H | -4.193558000 | -2.849363000 | 0.909943000  |
| C | -2.347001000 | -1.567978000 | 1.038427000  |
| H | -2.113421000 | -1.542595000 | 2.092925000  |
| C | -3.535335000 | 1.908243000  | 0.355027000  |
| H | -2.634954000 | 2.488134000  | 0.502698000  |
| C | -4.296558000 | 1.249255000  | 1.389352000  |
| H | -4.071365000 | 1.259823000  | 2.446611000  |
| C | -5.402983000 | 0.565555000  | 0.762733000  |
| H | -6.152360000 | -0.027533000 | 1.268517000  |
| C | -5.324210000 | 0.799457000  | -0.659687000 |
| H | -6.006657000 | 0.416159000  | -1.405721000 |
| C | -4.169528000 | 1.629919000  | -0.911152000 |
| H | -3.836081000 | 1.977984000  | -1.879042000 |
| N | -0.410295000 | -0.163787000 | 0.305407000  |
| H | 0.288998000  | -0.120185000 | -1.678652000 |

### Z-3

|    |              |              |              |
|----|--------------|--------------|--------------|
| Fe | -3.379184000 | 0.140678000  | 0.035444000  |
| Fe | 3.387821000  | -0.161259000 | 0.141316000  |
| C  | -0.561854000 | 0.469061000  | -1.343379000 |
| C  | -1.473708000 | 1.005019000  | -0.319903000 |
| C  | -1.619648000 | 0.668880000  | 1.085793000  |
| H  | -1.000629000 | -0.019611000 | 1.638973000  |
| C  | -2.733145000 | 1.411155000  | 1.611562000  |
| H  | -3.092888000 | 1.372574000  | 2.630221000  |
| C  | -3.295849000 | 2.203547000  | 0.543080000  |
| H  | -4.144604000 | 2.867764000  | 0.623424000  |
| C  | -2.533586000 | 1.946266000  | -0.647297000 |
| H  | -2.697211000 | 2.388078000  | -1.620986000 |
| C  | -3.596237000 | -1.614153000 | -1.139426000 |
| H  | -2.847517000 | -1.995652000 | -1.819952000 |
| C  | -4.638667000 | -0.670514000 | -1.466504000 |

|   |              |              |              |
|---|--------------|--------------|--------------|
| H | -4.816605000 | -0.231280000 | -2.438275000 |
| C | -5.401756000 | -0.416629000 | -0.267380000 |
| H | -6.247104000 | 0.251974000  | -0.181290000 |
| C | -4.828746000 | -1.200914000 | 0.800281000  |
| H | -5.169904000 | -1.222907000 | 1.825945000  |
| C | -3.711895000 | -1.941053000 | 0.260971000  |
| H | -3.070672000 | -2.615834000 | 0.810607000  |
| C | 1.268161000  | -0.433595000 | -0.055058000 |
| C | 1.577536000  | 0.453909000  | 1.049827000  |
| H | 1.246909000  | 1.477516000  | 1.148434000  |
| C | 2.388143000  | -0.275695000 | 1.994550000  |
| H | 2.775160000  | 0.110975000  | 2.927152000  |
| C | 2.603340000  | -1.604291000 | 1.471072000  |
| H | 3.171025000  | -2.391517000 | 1.946831000  |
| C | 1.941123000  | -1.692383000 | 0.193127000  |
| H | 1.907955000  | -2.548683000 | -0.464969000 |
| C | 4.145261000  | 0.667126000  | -1.655456000 |
| H | 3.535721000  | 0.894695000  | -2.518722000 |
| C | 4.790894000  | -0.594966000 | -1.385500000 |
| H | 4.762705000  | -1.469844000 | -2.020135000 |
| C | 5.469018000  | -0.487459000 | -0.114998000 |
| H | 6.038917000  | -1.268288000 | 0.369586000  |
| C | 5.240583000  | 0.841527000  | 0.401169000  |
| H | 5.609998000  | 1.231027000  | 1.339847000  |
| C | 4.422109000  | 1.554599000  | -0.551433000 |
| H | 4.071656000  | 2.572617000  | -0.451764000 |
| N | 0.564434000  | -0.176634000 | -1.252173000 |
| H | -0.914968000 | 0.631316000  | -2.366094000 |

TS(E-2 → Z-2)

|    |              |              |              |
|----|--------------|--------------|--------------|
| Fe | -3.676553000 | 0.039408000  | 0.165068000  |
| Fe | 3.622431000  | 0.041301000  | -0.040415000 |
| C  | -0.371644000 | -0.630342000 | -0.381909000 |
| C  | -1.456470000 | -0.611209000 | 0.447299000  |
| C  | -2.476462000 | -1.655079000 | 0.598269000  |
| H  | -2.461654000 | -2.605819000 | 0.083705000  |
| C  | -3.351431000 | -1.298006000 | 1.703758000  |
| H  | -4.112664000 | -1.936858000 | 2.129678000  |
| C  | -3.014470000 | 0.035672000  | 2.119282000  |
| H  | -3.471869000 | 0.600612000  | 2.919699000  |
| C  | -1.927556000 | 0.504683000  | 1.273918000  |
| H  | -1.431151000 | 1.461930000  | 1.354138000  |
| C  | -3.990865000 | 0.715317000  | -1.829582000 |
| H  | -3.242819000 | 0.743495000  | -2.610342000 |
| C  | -4.292996000 | 1.777224000  | -0.897449000 |
| H  | -3.797887000 | 2.737864000  | -0.847514000 |
| C  | -5.369394000 | 1.337742000  | -0.043090000 |
| H  | -5.821782000 | 1.910241000  | 0.755386000  |
| C  | -5.732094000 | -0.002622000 | -0.439887000 |
| H  | -6.503998000 | -0.613035000 | 0.009148000  |
| C  | -4.878525000 | -0.387288000 | -1.537290000 |

|   |              |              |              |
|---|--------------|--------------|--------------|
| H | -4.900272000 | -1.338104000 | -2.052838000 |
| C | 1.997429000  | -1.139013000 | -0.687868000 |
| C | 2.374369000  | -1.537042000 | 0.641394000  |
| H | 1.733297000  | -1.515329000 | 1.510205000  |
| C | 3.742594000  | -1.985769000 | 0.576376000  |
| H | 4.326075000  | -2.349208000 | 1.410269000  |
| C | 4.200374000  | -1.856683000 | -0.786724000 |
| H | 5.184125000  | -2.110319000 | -1.155250000 |
| C | 3.116730000  | -1.326276000 | -1.577155000 |
| H | 3.132934000  | -1.129673000 | -2.640554000 |
| C | 3.073429000  | 2.088497000  | -0.033829000 |
| H | 2.109294000  | 2.478761000  | -0.329687000 |
| C | 4.211766000  | 1.887804000  | -0.899467000 |
| H | 4.251520000  | 2.102329000  | -1.958433000 |
| C | 5.288904000  | 1.350938000  | -0.102612000 |
| H | 6.273681000  | 1.085487000  | -0.461259000 |
| C | 4.816240000  | 1.218873000  | 1.254769000  |
| H | 5.384343000  | 0.836256000  | 2.091201000  |
| C | 3.447155000  | 1.675114000  | 1.297356000  |
| H | 2.811623000  | 1.697062000  | 2.171595000  |
| N | 0.687556000  | -0.678428000 | -1.100466000 |
| H | 0.688954000  | -0.380327000 | -2.090236000 |

**TS(E-3 → Z-3)**

|    |              |              |              |
|----|--------------|--------------|--------------|
| Fe | -3.526762000 | 0.047475000  | -0.051280000 |
| Fe | 3.559105000  | 0.039501000  | 0.153673000  |
| C  | -0.600028000 | -0.698678000 | -1.070145000 |
| C  | -1.941970000 | -1.187556000 | -0.712778000 |
| C  | -3.063656000 | -1.281135000 | -1.628433000 |
| H  | -3.042472000 | -1.027518000 | -2.679719000 |
| C  | -4.192422000 | -1.787513000 | -0.896065000 |
| H  | -5.178768000 | -1.973344000 | -1.297248000 |
| C  | -3.779927000 | -2.000523000 | 0.473312000  |
| H  | -4.407309000 | -2.368421000 | 1.272989000  |
| C  | -2.396692000 | -1.627947000 | 0.590260000  |
| H  | -1.788534000 | -1.670809000 | 1.482350000  |
| C  | -2.881518000 | 2.066262000  | 0.061426000  |
| H  | -1.890563000 | 2.414106000  | -0.195755000 |
| C  | -3.308077000 | 1.611811000  | 1.362670000  |
| H  | -2.695305000 | 1.564279000  | 2.251932000  |
| C  | -4.695863000 | 1.224177000  | 1.265546000  |
| H  | -5.303800000 | 0.832378000  | 2.069098000  |
| C  | -5.125280000 | 1.438802000  | -0.095581000 |
| H  | -6.111301000 | 1.235988000  | -0.490017000 |
| C  | -4.003202000 | 1.957923000  | -0.840973000 |
| H  | -4.003234000 | 2.219243000  | -1.890024000 |
| C  | 1.462292000  | -0.646536000 | 0.511599000  |
| C  | 1.865749000  | 0.455894000  | 1.367143000  |
| H  | 1.343650000  | 1.398670000  | 1.449897000  |
| C  | 2.999079000  | 0.023978000  | 2.161149000  |
| H  | 3.480867000  | 0.603924000  | 2.935902000  |

|   |              |              |              |
|---|--------------|--------------|--------------|
| C | 3.359992000  | -1.303024000 | 1.735632000  |
| H | 4.164115000  | -1.908026000 | 2.130620000  |
| C | 2.451512000  | -1.696838000 | 0.677050000  |
| H | 2.441855000  | -2.643057000 | 0.154933000  |
| C | 3.752459000  | 0.724411000  | -1.846539000 |
| H | 2.962631000  | 0.739826000  | -2.584980000 |
| C | 4.673245000  | -0.362783000 | -1.607038000 |
| H | 4.685404000  | -1.310450000 | -2.128059000 |
| C | 5.570482000  | 0.031878000  | -0.548020000 |
| H | 6.371922000  | -0.567170000 | -0.137682000 |
| C | 5.204085000  | 1.364331000  | -0.127695000 |
| H | 5.682783000  | 1.939775000  | 0.652843000  |
| C | 4.081214000  | 1.789897000  | -0.927946000 |
| H | 3.572096000  | 2.740990000  | -0.850495000 |
| N | 0.400587000  | -0.673979000 | -0.303037000 |
| H | -0.517911000 | -0.344878000 | -2.114984000 |

TS(**E-2** → **E-3**)

|    |              |              |              |
|----|--------------|--------------|--------------|
| Fe | 3.462730000  | 0.179715000  | 0.020682000  |
| Fe | -3.476510000 | -0.153535000 | 0.032591000  |
| C  | 0.429537000  | 0.018354000  | -1.030260000 |
| C  | 1.566011000  | 0.852996000  | -0.634424000 |
| C  | 2.597945000  | 1.280676000  | -1.567408000 |
| H  | 2.629312000  | 1.011958000  | -2.613772000 |
| C  | 3.526035000  | 2.116281000  | -0.863516000 |
| H  | 4.403350000  | 2.588618000  | -1.282766000 |
| C  | 3.085575000  | 2.217828000  | 0.512898000  |
| H  | 3.581979000  | 2.778436000  | 1.293053000  |
| C  | 1.888967000  | 1.441762000  | 0.661838000  |
| H  | 1.307240000  | 1.311893000  | 1.562350000  |
| C  | 3.512105000  | -1.942535000 | 0.148304000  |
| H  | 2.696931000  | -2.605554000 | -0.106946000 |
| C  | 3.760359000  | -1.363861000 | 1.446309000  |
| H  | 3.164264000  | -1.515705000 | 2.335134000  |
| C  | 4.945600000  | -0.544346000 | 1.346337000  |
| H  | 5.389190000  | 0.031437000  | 2.146692000  |
| C  | 5.426040000  | -0.617168000 | -0.012682000 |
| H  | 6.291388000  | -0.103744000 | -0.408337000 |
| C  | 4.537810000  | -1.479285000 | -0.755111000 |
| H  | 4.623443000  | -1.732637000 | -1.802412000 |
| C  | -1.588229000 | -1.054254000 | -0.191664000 |
| C  | -2.324237000 | -1.148535000 | -1.438362000 |
| H  | -2.014786000 | -0.718879000 | -2.378587000 |
| C  | -3.520740000 | -1.901992000 | -1.175422000 |
| H  | -4.290970000 | -2.137603000 | -1.896710000 |
| C  | -3.531798000 | -2.270476000 | 0.223117000  |
| H  | -4.306796000 | -2.832816000 | 0.724580000  |
| C  | -2.342562000 | -1.741400000 | 0.834816000  |
| H  | -2.043030000 | -1.836354000 | 1.868528000  |
| C  | -3.239534000 | 1.885051000  | 0.569429000  |
| H  | -2.284792000 | 2.371802000  | 0.711132000  |

|   |              |              |              |
|---|--------------|--------------|--------------|
| C | -3.998044000 | 1.194022000  | 1.584328000  |
| H | -3.717832000 | 1.085418000  | 2.622755000  |
| C | -5.193175000 | 0.668778000  | 0.966990000  |
| H | -5.964125000 | 0.093979000  | 1.461325000  |
| C | -5.170938000 | 1.033286000  | -0.429554000 |
| H | -5.922052000 | 0.779179000  | -1.164598000 |
| C | -3.962264000 | 1.784718000  | -0.675368000 |
| H | -3.649155000 | 2.193471000  | -1.625885000 |
| N | -0.346937000 | -0.400044000 | 0.076739000  |
| H | 0.466520000  | -1.222683000 | -0.491375000 |

TS(Z-2 → Z-3)

|    |              |              |              |
|----|--------------|--------------|--------------|
| Fe | 3.425413000  | 0.156490000  | 0.052268000  |
| Fe | -3.428190000 | -0.180324000 | 0.111108000  |
| C  | 0.615652000  | 0.555833000  | -1.277003000 |
| C  | 1.509151000  | 1.017412000  | -0.218978000 |
| C  | 2.552722000  | 2.001850000  | -0.467115000 |
| H  | 2.699402000  | 2.515164000  | -1.406582000 |
| C  | 3.315058000  | 2.171167000  | 0.736863000  |
| H  | 4.153409000  | 2.840168000  | 0.870736000  |
| C  | 2.775685000  | 1.278310000  | 1.738429000  |
| H  | 3.148111000  | 1.160121000  | 2.746699000  |
| C  | 1.671556000  | 0.564075000  | 1.160306000  |
| H  | 1.072159000  | -0.185078000 | 1.654882000  |
| C  | 3.664131000  | -1.483102000 | -1.274490000 |
| H  | 2.908590000  | -1.804936000 | -1.977305000 |
| C  | 3.798488000  | -1.930965000 | 0.090375000  |
| H  | 3.175664000  | -2.664781000 | 0.582567000  |
| C  | 4.907128000  | -1.220788000 | 0.684621000  |
| H  | 5.259263000  | -1.327628000 | 1.701265000  |
| C  | 5.454836000  | -0.333707000 | -0.313609000 |
| H  | 6.288103000  | 0.341238000  | -0.174744000 |
| C  | 4.684610000  | -0.493959000 | -1.524537000 |
| H  | 4.839403000  | 0.037213000  | -2.453149000 |
| C  | -1.343886000 | -0.599750000 | -0.082849000 |
| C  | -2.114524000 | -1.822293000 | -0.114810000 |
| H  | -2.120640000 | -2.532581000 | -0.929233000 |
| C  | -2.826584000 | -1.931608000 | 1.133752000  |
| H  | -3.480385000 | -2.742919000 | 1.421322000  |
| C  | -2.521240000 | -0.764884000 | 1.927959000  |
| H  | -2.911604000 | -0.545817000 | 2.912109000  |
| C  | -1.617072000 | 0.068989000  | 1.174220000  |
| H  | -1.207000000 | 1.017534000  | 1.487688000  |
| C  | -4.040049000 | 1.084799000  | -1.474788000 |
| H  | -3.385321000 | 1.456046000  | -2.250928000 |
| C  | -4.300905000 | 1.724742000  | -0.207728000 |
| H  | -3.882405000 | 2.663587000  | 0.127467000  |
| C  | -5.211375000 | 0.886734000  | 0.536471000  |
| H  | -5.593241000 | 1.086823000  | 1.528065000  |
| C  | -5.513390000 | -0.270980000 | -0.271485000 |
| H  | -6.160374000 | -1.090552000 | 0.009423000  |

|   |              |              |              |
|---|--------------|--------------|--------------|
| C | -4.788704000 | -0.148763000 | -1.514239000 |
| H | -4.799949000 | -0.859141000 | -2.329198000 |
| N | -0.534223000 | -0.153998000 | -1.162330000 |
| H | -0.219146000 | 0.214526000  | -2.280719000 |

**W(CO)<sub>5</sub>(E-2)**

|    |              |              |              |
|----|--------------|--------------|--------------|
| Fe | -0.203910000 | 3.472657000  | 0.068855000  |
| O  | -4.475485000 | -3.391522000 | -0.477936000 |
| O  | -4.057346000 | 0.120521000  | 2.101452000  |
| Fe | 3.645146000  | -1.264184000 | -0.002222000 |
| W  | -2.090487000 | -1.299926000 | -0.015994000 |
| C  | -0.495999000 | 0.233999000  | 0.293395000  |
| C  | -0.808154000 | 1.579135000  | 0.843561000  |
| C  | -1.968792000 | 2.409526000  | 0.602233000  |
| H  | -2.779379000 | 2.185092000  | -0.073339000 |
| O  | -3.216525000 | 0.519450000  | -2.424972000 |
| C  | -1.854085000 | 3.599052000  | 1.398629000  |
| H  | -2.567505000 | 4.410269000  | 1.426046000  |
| O  | -0.514426000 | -3.072475000 | -2.195591000 |
| C  | -0.624523000 | 3.523879000  | 2.149194000  |
| H  | -0.264121000 | 4.256904000  | 2.856763000  |
| O  | -0.950743000 | -3.120813000 | 2.384366000  |
| C  | 0.034988000  | 2.296901000  | 1.799040000  |
| H  | 0.948825000  | 1.923040000  | 2.240329000  |
| C  | 0.767815000  | 3.256639000  | -1.808189000 |
| H  | 0.927506000  | 2.322875000  | -2.329750000 |
| C  | 1.665489000  | 3.868925000  | -0.855915000 |
| H  | 2.629934000  | 3.488491000  | -0.548035000 |
| C  | 1.062834000  | 5.102080000  | -0.407521000 |
| H  | 1.483782000  | 5.790732000  | 0.311758000  |
| C  | -0.203988000 | 5.250131000  | -1.082275000 |
| H  | -0.900924000 | 6.066263000  | -0.952272000 |
| C  | -0.386588000 | 4.109447000  | -1.947306000 |
| H  | -1.241866000 | 3.921038000  | -2.580807000 |
| C  | 1.569875000  | -1.050514000 | -0.330037000 |
| C  | 1.822272000  | -2.229905000 | 0.464222000  |
| H  | 1.459400000  | -2.414261000 | 1.463767000  |
| C  | 2.644984000  | -3.109256000 | -0.324349000 |
| H  | 3.003740000  | -4.080686000 | -0.015938000 |
| C  | 2.912525000  | -2.469075000 | -1.588758000 |
| H  | 3.498765000  | -2.881115000 | -2.397384000 |
| C  | 2.256372000  | -1.188517000 | -1.593597000 |
| H  | 2.238811000  | -0.474963000 | -2.405034000 |
| C  | 4.412852000  | 0.426894000  | 1.019143000  |
| H  | 3.851177000  | 1.295453000  | 1.337021000  |
| C  | 5.091626000  | 0.268000000  | -0.245954000 |
| H  | 5.117116000  | 0.988253000  | -1.052015000 |
| C  | 5.737235000  | -1.022574000 | -0.244802000 |
| H  | 6.317962000  | -1.442827000 | -1.054075000 |
| C  | 5.458839000  | -1.660201000 | 1.019652000  |
| H  | 5.793590000  | -2.642418000 | 1.322941000  |

|   |              |              |              |
|---|--------------|--------------|--------------|
| C | 4.641084000  | -0.764848000 | 1.801810000  |
| H | 4.264741000  | -0.954603000 | 2.797380000  |
| C | -3.589924000 | -2.617509000 | -0.305010000 |
| C | -3.301969000 | -0.364731000 | 1.329308000  |
| C | -2.799348000 | -0.145008000 | -1.536909000 |
| C | -1.025910000 | -2.379342000 | -1.383487000 |
| C | -1.361155000 | -2.448243000 | 1.499981000  |
| N | 0.830383000  | 0.109745000  | 0.065692000  |
| H | 1.395723000  | 0.957872000  | 0.148946000  |

**W(CO)<sub>5</sub>(Z-2)**

|    |              |              |              |
|----|--------------|--------------|--------------|
| Fe | -1.187169000 | 3.071478000  | 0.040628000  |
| O  | -3.702808000 | -4.185442000 | -0.683437000 |
| O  | -3.304662000 | -1.375958000 | 2.807263000  |
| Fe | 4.084240000  | -0.187097000 | 0.036842000  |
| W  | -1.796751000 | -1.699647000 | -0.023762000 |
| C  | -0.362912000 | 0.008826000  | 0.466968000  |
| C  | -0.719508000 | 1.287440000  | 1.093509000  |
| C  | -2.097824000 | 1.696117000  | 1.361175000  |
| H  | -2.978333000 | 1.116425000  | 1.141264000  |
| O  | -3.933374000 | 0.182986000  | -1.527321000 |
| C  | -2.093902000 | 2.985938000  | 1.973684000  |
| H  | -2.967852000 | 3.541190000  | 2.282899000  |
| O  | -0.333604000 | -2.121910000 | -2.858981000 |
| C  | -0.723031000 | 3.420244000  | 2.093717000  |
| H  | -0.388187000 | 4.358579000  | 2.513139000  |
| O  | 0.228801000  | -3.761696000 | 1.396105000  |
| C  | 0.123072000  | 2.404798000  | 1.548352000  |
| H  | 1.196274000  | 2.457463000  | 1.517115000  |
| C  | -0.958796000 | 2.826890000  | -2.057951000 |
| H  | -0.658931000 | 1.908945000  | -2.544392000 |
| C  | -0.075380000 | 3.864007000  | -1.581674000 |
| H  | 1.002906000  | 3.868859000  | -1.653377000 |
| C  | -0.887914000 | 4.897905000  | -0.985586000 |
| H  | -0.523815000 | 5.806913000  | -0.527158000 |
| C  | -2.269869000 | 4.496546000  | -1.092673000 |
| H  | -3.122235000 | 5.052201000  | -0.727128000 |
| C  | -2.314577000 | 3.215428000  | -1.754886000 |
| H  | -3.202946000 | 2.641484000  | -1.975797000 |
| C  | 2.142018000  | 0.502624000  | 0.447686000  |
| C  | 2.784104000  | 1.394055000  | -0.490326000 |
| H  | 2.437508000  | 1.612397000  | -1.489973000 |
| C  | 3.954505000  | 1.928817000  | 0.157502000  |
| H  | 4.657156000  | 2.624256000  | -0.279239000 |
| C  | 4.034386000  | 1.365899000  | 1.485387000  |
| H  | 4.806025000  | 1.568424000  | 2.214384000  |
| C  | 2.915970000  | 0.476691000  | 1.667377000  |
| H  | 2.675724000  | -0.094478000 | 2.552733000  |
| C  | 4.008513000  | -2.134956000 | -0.797650000 |
| H  | 3.120920000  | -2.719144000 | -1.001159000 |
| C  | 4.773772000  | -2.155168000 | 0.426081000  |



|   |              |              |              |
|---|--------------|--------------|--------------|
| H | 4.544866000  | -2.735375000 | 1.309105000  |
| C | 5.895825000  | -1.262577000 | 0.263341000  |
| H | 6.651914000  | -1.051070000 | 1.006688000  |
| C | 5.824777000  | -0.692067000 | -1.060654000 |
| H | 6.517997000  | 0.022141000  | -1.482988000 |
| C | 4.658067000  | -1.230942000 | -1.717011000 |
| H | 4.328935000  | -1.000615000 | -2.720710000 |
| C | -2.998589000 | -3.259044000 | -0.437287000 |
| C | -2.743488000 | -1.471912000 | 1.770013000  |
| C | -3.131862000 | -0.479495000 | -0.958759000 |
| C | -0.865338000 | -1.955794000 | -1.811068000 |
| C | -0.506582000 | -2.987975000 | 0.879780000  |
| N | 0.942188000  | -0.256596000 | 0.204254000  |
| H | 1.114987000  | -1.160090000 | -0.224342000 |

### W(CO)<sub>5</sub>(E-3)

|    |              |              |              |
|----|--------------|--------------|--------------|
| Fe | -3.559728000 | -0.902513000 | 0.049806000  |
| O  | 3.659192000  | -4.111790000 | -0.366662000 |
| O  | 0.714274000  | -3.064155000 | 2.650432000  |
| Fe | 0.597950000  | 3.559970000  | -0.047342000 |
| W  | 1.778338000  | -1.580190000 | 0.000132000  |
| C  | -0.806350000 | 0.435988000  | 0.672582000  |
| C  | -1.800295000 | -0.504988000 | 1.154750000  |
| C  | -1.984561000 | -1.940038000 | 1.001944000  |
| H  | -1.323328000 | -2.625992000 | 0.504591000  |
| O  | -0.259647000 | -2.999641000 | -2.047875000 |
| C  | -3.223292000 | -2.302101000 | 1.625566000  |
| H  | -3.632065000 | -3.301326000 | 1.673205000  |
| O  | 3.276482000  | -0.313735000 | -2.556530000 |
| C  | -3.834709000 | -1.109299000 | 2.160237000  |
| H  | -4.777566000 | -1.059726000 | 2.685626000  |
| O  | 4.071189000  | -0.340452000 | 1.891824000  |
| C  | -2.979712000 | -0.001597000 | 1.860185000  |
| H  | -3.148680000 | 1.029474000  | 2.138900000  |
| C  | -3.463220000 | -0.004195000 | -1.871772000 |
| H  | -2.642911000 | 0.601040000  | -2.232594000 |
| C  | -4.623836000 | 0.477536000  | -1.161083000 |
| H  | -4.835468000 | 1.507056000  | -0.908047000 |
| C  | -5.459157000 | -0.659650000 | -0.855766000 |
| H  | -6.398448000 | -0.633136000 | -0.321034000 |
| C  | -4.812578000 | -1.840658000 | -1.375269000 |
| H  | -5.181499000 | -2.853678000 | -1.295426000 |
| C  | -3.576729000 | -1.436485000 | -2.002402000 |
| H  | -2.857946000 | -2.091523000 | -2.474124000 |
| C  | 1.055992000  | 1.467800000  | -0.281499000 |
| C  | 2.173919000  | 2.176818000  | 0.289020000  |
| H  | 2.636043000  | 1.975129000  | 1.243457000  |
| C  | 2.579363000  | 3.187843000  | -0.655902000 |
| H  | 3.396059000  | 3.882715000  | -0.522488000 |
| C  | 1.696879000  | 3.121688000  | -1.794470000 |
| H  | 1.740323000  | 3.750258000  | -2.672324000 |

|   |              |              |              |
|---|--------------|--------------|--------------|
| C | 0.744467000  | 2.066934000  | -1.558449000 |
| H | -0.032233000 | 1.735729000  | -2.233466000 |
| C | -0.813952000 | 3.997275000  | 1.496402000  |
| H | -1.202500000 | 3.309799000  | 2.234859000  |
| C | -1.390392000 | 4.289780000  | 0.204512000  |
| H | -2.288171000 | 3.852416000  | -0.210248000 |
| C | -0.568356000 | 5.289197000  | -0.432836000 |
| H | -0.731319000 | 5.715710000  | -1.412809000 |
| C | 0.515041000  | 5.613176000  | 0.463931000  |
| H | 1.309716000  | 6.320366000  | 0.270979000  |
| C | 0.364128000  | 4.813199000  | 1.654360000  |
| H | 1.020320000  | 4.821164000  | 2.513515000  |
| C | 2.958856000  | -3.157101000 | -0.229270000 |
| C | 1.040543000  | -2.486762000 | 1.669551000  |
| C | 0.456697000  | -2.458218000 | -1.273473000 |
| C | 2.692208000  | -0.740678000 | -1.621648000 |
| C | 3.203228000  | -0.759670000 | 1.204816000  |
| N | 0.421995000  | 0.265282000  | 0.229382000  |
| H | -1.152045000 | 1.471141000  | 0.704337000  |

### W(CO)<sub>5</sub>(Z-3)

|    |              |              |              |
|----|--------------|--------------|--------------|
| Fe | -4.176630000 | 0.474238000  | 0.065461000  |
| O  | 3.138082000  | -4.350525000 | -0.491399000 |
| O  | -0.078806000 | -3.621818000 | 2.321054000  |
| Fe | 2.119530000  | 2.565509000  | -0.140203000 |
| W  | 1.293686000  | -1.818911000 | 0.038049000  |
| C  | -1.241600000 | -0.181488000 | 0.948497000  |
| C  | -2.368238000 | 0.714962000  | 1.150565000  |
| C  | -3.463962000 | 0.338379000  | 2.040388000  |
| H  | -3.487073000 | -0.544317000 | 2.664696000  |
| O  | -0.909984000 | -2.905469000 | -2.037545000 |
| C  | -4.461775000 | 1.363941000  | 1.981116000  |
| H  | -5.387721000 | 1.381696000  | 2.537838000  |
| O  | 2.885281000  | -0.559208000 | -2.459454000 |
| C  | -4.020437000 | 2.364085000  | 1.036104000  |
| H  | -4.566533000 | 3.253268000  | 0.754538000  |
| O  | 3.315192000  | -0.780781000 | 2.322708000  |
| C  | -2.742691000 | 1.971157000  | 0.517569000  |
| H  | -2.164849000 | 2.517745000  | -0.209398000 |
| C  | -3.997139000 | -1.000260000 | -1.464604000 |
| H  | -3.109142000 | -1.574765000 | -1.688384000 |
| C  | -4.349736000 | 0.273150000  | -2.042205000 |
| H  | -3.772820000 | 0.820316000  | -2.774492000 |
| C  | -5.611880000 | 0.684873000  | -1.474470000 |
| H  | -6.141279000 | 1.600518000  | -1.698515000 |
| C  | -6.035864000 | -0.333356000 | -0.543942000 |
| H  | -6.938493000 | -0.313250000 | 0.050980000  |
| C  | -5.035682000 | -1.374043000 | -0.534953000 |
| H  | -5.064883000 | -2.278820000 | 0.055943000  |
| C  | 0.299612000  | 1.374126000  | 0.067053000  |
| C  | 0.424339000  | 1.896355000  | -1.272198000 |

|   |              |              |              |
|---|--------------|--------------|--------------|
| H | 0.432756000  | 1.312352000  | -2.180986000 |
| C | 0.459276000  | 3.334953000  | -1.179861000 |
| H | 0.542148000  | 4.017770000  | -2.013554000 |
| C | 0.394330000  | 3.698922000  | 0.216662000  |
| H | 0.422326000  | 4.702664000  | 0.616070000  |
| C | 0.319067000  | 2.485695000  | 0.988767000  |
| H | 0.232860000  | 2.409298000  | 2.063310000  |
| C | 4.010291000  | 1.553993000  | -0.018570000 |
| H | 4.180543000  | 0.490663000  | 0.022671000  |
| C | 3.839418000  | 2.427982000  | 1.114394000  |
| H | 3.839423000  | 2.128285000  | 2.152665000  |
| C | 3.681565000  | 3.772003000  | 0.614803000  |
| H | 3.522243000  | 4.658357000  | 1.213215000  |
| C | 3.748575000  | 3.722936000  | -0.827025000 |
| H | 3.646055000  | 4.565524000  | -1.497013000 |
| C | 3.946466000  | 2.348905000  | -1.217761000 |
| H | 4.031127000  | 1.976955000  | -2.228701000 |
| C | 2.445050000  | -3.401520000 | -0.292704000 |
| C | 0.400551000  | -2.915855000 | 1.497100000  |
| C | -0.088804000 | -2.499459000 | -1.285197000 |
| C | 2.282816000  | -0.943159000 | -1.515611000 |
| C | 2.582472000  | -1.130027000 | 1.462749000  |
| N | -0.046133000 | 0.013770000  | 0.422178000  |
| H | -1.436187000 | -1.195704000 | 1.288622000  |

**[W(CO)<sub>5</sub>...(E-3)]**

|    |              |              |              |
|----|--------------|--------------|--------------|
| Fe | -4.975956000 | -0.662836000 | 0.031431000  |
| O  | 3.411457000  | -4.493421000 | 0.233206000  |
| O  | 1.714443000  | -1.586899000 | 3.164277000  |
| Fe | 1.141711000  | 3.071266000  | -0.211216000 |
| W  | 2.662991000  | -1.438743000 | 0.091932000  |
| C  | -2.247365000 | 0.814923000  | 0.670461000  |
| C  | -3.694813000 | 0.830936000  | 0.813695000  |
| C  | -4.433517000 | 0.187426000  | 1.886842000  |
| H  | -3.998524000 | -0.347626000 | 2.720193000  |
| O  | -0.308909000 | -2.231766000 | -0.858150000 |
| C  | -5.834596000 | 0.408114000  | 1.655767000  |
| H  | -6.643669000 | 0.060665000  | 2.282561000  |
| O  | 3.652876000  | -1.400272000 | -2.973401000 |
| C  | -5.973024000 | 1.174852000  | 0.437409000  |
| H  | -6.905826000 | 1.492752000  | -0.006777000 |
| O  | 5.659325000  | -0.745430000 | 1.044947000  |
| C  | -4.659937000 | 1.431431000  | -0.086057000 |
| H  | -4.412983000 | 1.978697000  | -0.983508000 |
| C  | -3.840195000 | -2.133654000 | -1.006651000 |
| H  | -2.763557000 | -2.129601000 | -1.102572000 |
| C  | -4.774669000 | -1.501780000 | -1.905515000 |
| H  | -4.519966000 | -0.946641000 | -2.797469000 |
| C  | -6.108113000 | -1.733638000 | -1.400215000 |
| H  | -7.027856000 | -1.381289000 | -1.846185000 |
| C  | -5.996260000 | -2.506269000 | -0.186207000 |

|   |              |              |              |
|---|--------------|--------------|--------------|
| H | -6.817551000 | -2.834723000 | 0.435766000  |
| C | -4.594295000 | -2.750502000 | 0.058454000  |
| H | -4.181152000 | -3.300868000 | 0.892291000  |
| C | -0.221927000 | 1.419016000  | -0.361520000 |
| C | 0.760358000  | 1.208830000  | 0.679770000  |
| H | 0.563787000  | 1.074248000  | 1.733533000  |
| C | 2.081483000  | 1.178323000  | 0.053905000  |
| H | 3.018012000  | 1.295797000  | 0.588433000  |
| C | 1.892764000  | 1.479919000  | -1.365831000 |
| H | 2.680114000  | 1.567660000  | -2.099914000 |
| C | 0.488103000  | 1.612540000  | -1.609289000 |
| H | 0.009672000  | 1.793486000  | -2.560111000 |
| C | 0.033261000  | 4.816236000  | 0.226300000  |
| H | -1.041267000 | 4.834859000  | 0.342879000  |
| C | 0.752721000  | 4.986886000  | -1.013168000 |
| H | 0.309726000  | 5.167651000  | -1.982555000 |
| C | 2.163305000  | 4.856359000  | -0.733786000 |
| H | 2.964647000  | 4.931160000  | -1.455672000 |
| C | 2.313323000  | 4.605633000  | 0.679309000  |
| H | 3.248243000  | 4.448741000  | 1.199995000  |
| C | 0.998388000  | 4.578676000  | 1.273295000  |
| H | 0.775369000  | 4.409178000  | 2.317407000  |
| C | 3.128302000  | -3.336858000 | 0.178193000  |
| C | 2.059558000  | -1.510597000 | 2.034944000  |
| C | 0.778917000  | -1.922552000 | -0.515940000 |
| C | 3.281336000  | -1.389832000 | -1.851533000 |
| C | 4.552879000  | -0.974216000 | 0.695000000  |
| N | -1.627716000 | 1.457055000  | -0.279290000 |
| H | -1.703612000 | 0.215382000  | 1.415365000  |

**TS(W(CO)<sub>5</sub>(E-2) → W(CO)<sub>5</sub>(Z-2))**

|    |              |              |              |
|----|--------------|--------------|--------------|
| Fe | -0.836534000 | 3.143062000  | 0.131118000  |
| O  | -4.249058000 | -3.701932000 | -0.252514000 |
| O  | -2.332835000 | -1.330563000 | 3.183581000  |
| Fe | 3.978940000  | -0.644243000 | -0.049567000 |
| W  | -1.918853000 | -1.485198000 | -0.008814000 |
| C  | -0.370389000 | 0.036986000  | 0.122469000  |
| C  | -0.338272000 | 1.233547000  | 0.919985000  |
| C  | -1.425334000 | 1.842050000  | 1.696743000  |
| H  | -2.414967000 | 1.436623000  | 1.834280000  |
| O  | -4.220719000 | 0.719096000  | -0.445430000 |
| C  | -0.943444000 | 3.054931000  | 2.271310000  |
| H  | -1.511802000 | 3.725638000  | 2.900285000  |
| O  | -1.381290000 | -1.620935000 | -3.182047000 |
| C  | 0.431750000  | 3.247538000  | 1.856674000  |
| H  | 1.060562000  | 4.082245000  | 2.133012000  |
| O  | 0.080906000  | -3.999765000 | 0.355034000  |
| C  | 0.804899000  | 2.159603000  | 1.015589000  |
| H  | 1.765228000  | 1.982135000  | 0.559608000  |
| C  | -1.469728000 | 3.083829000  | -1.903431000 |
| H  | -1.543949000 | 2.186480000  | -2.502623000 |

|   |              |              |              |
|---|--------------|--------------|--------------|
| C | -0.301976000 | 3.921313000  | -1.772095000 |
| H | 0.645895000  | 3.778111000  | -2.271195000 |
| C | -0.632979000 | 4.998431000  | -0.869325000 |
| H | 0.031372000  | 5.791857000  | -0.556147000 |
| C | -1.998454000 | 4.818761000  | -0.440284000 |
| H | -2.534871000 | 5.454555000  | 0.250189000  |
| C | -2.516603000 | 3.631701000  | -1.077682000 |
| H | -3.506987000 | 3.218735000  | -0.953316000 |
| C | 1.846581000  | -1.019341000 | -0.371541000 |
| C | 2.264349000  | -1.375614000 | 0.966765000  |
| H | 1.852381000  | -0.977000000 | 1.883046000  |
| C | 3.277121000  | -2.401320000 | 0.860494000  |
| H | 3.755555000  | -2.904401000 | 1.688670000  |
| C | 3.531759000  | -2.631429000 | -0.538754000 |
| H | 4.239849000  | -3.335389000 | -0.952522000 |
| C | 2.666297000  | -1.759047000 | -1.301362000 |
| H | 2.602483000  | -1.706378000 | -2.379735000 |
| C | 4.453038000  | 1.393867000  | -0.420598000 |
| H | 3.761308000  | 2.149802000  | -0.766893000 |
| C | 5.258315000  | 0.539311000  | -1.260850000 |
| H | 5.268277000  | 0.538423000  | -2.342151000 |
| C | 6.047397000  | -0.314071000 | -0.406294000 |
| H | 6.746590000  | -1.070507000 | -0.735075000 |
| C | 5.727225000  | 0.008783000  | 0.964261000  |
| H | 6.147696000  | -0.460502000 | 1.843010000  |
| C | 4.741759000  | 1.063261000  | 0.955440000  |
| H | 4.297205000  | 1.519733000  | 1.829259000  |
| C | -3.384829000 | -2.894642000 | -0.166950000 |
| C | -2.181549000 | -1.388407000 | 2.012391000  |
| C | -3.356764000 | -0.074991000 | -0.279810000 |
| C | -1.584957000 | -1.568565000 | -2.016764000 |
| C | -0.592384000 | -3.039363000 | 0.230931000  |
| N | 0.855897000  | -0.079225000 | -0.687466000 |
| H | 0.746445000  | 0.149803000  | -1.670418000 |

**TS(W(CO)<sub>5</sub>(E-2) → [W(CO)<sub>5</sub>... (E-3)])**

|    |              |              |              |
|----|--------------|--------------|--------------|
| Fe | -2.830114000 | -2.312847000 | -0.166930000 |
| O  | -0.517992000 | 5.399615000  | -0.008177000 |
| O  | -1.973837000 | 2.377282000  | -2.819785000 |
| Fe | 3.544013000  | -1.371790000 | 0.120343000  |
| W  | -0.464356000 | 2.205082000  | 0.021424000  |
| C  | -0.428045000 | -0.090284000 | -0.049438000 |
| C  | -1.458744000 | -0.822293000 | -0.847371000 |
| C  | -2.828578000 | -0.428357000 | -1.126817000 |
| H  | -3.330127000 | 0.452192000  | -0.759286000 |
| O  | -3.301185000 | 2.190621000  | 1.549158000  |
| C  | -3.416133000 | -1.410651000 | -1.993606000 |
| H  | -4.424483000 | -1.386834000 | -2.381738000 |
| O  | 0.910720000  | 2.501573000  | 2.918632000  |
| C  | -2.428820000 | -2.432772000 | -2.250000000 |
| H  | -2.566610000 | -3.306845000 | -2.870816000 |

|   |              |              |              |
|---|--------------|--------------|--------------|
| O | 2.254017000  | 2.317720000  | -1.701492000 |
| C | -1.233602000 | -2.085878000 | -1.534381000 |
| H | -0.306920000 | -2.638700000 | -1.515008000 |
| C | -2.719563000 | -2.560037000 | 1.940963000  |
| H | -2.097568000 | -1.991796000 | 2.619471000  |
| C | -2.350701000 | -3.789082000 | 1.279960000  |
| H | -1.400607000 | -4.297416000 | 1.363850000  |
| C | -3.477122000 | -4.220286000 | 0.486718000  |
| H | -3.515131000 | -5.103031000 | -0.136441000 |
| C | -4.538739000 | -3.257234000 | 0.656589000  |
| H | -5.509539000 | -3.291694000 | 0.182032000  |
| C | -4.070219000 | -2.229497000 | 1.554993000  |
| H | -4.630234000 | -1.363661000 | 1.879428000  |
| C | 1.741706000  | -0.852331000 | 1.070498000  |
| C | 2.701090000  | 0.249077000  | 1.172887000  |
| H | 2.599726000  | 1.243356000  | 0.779947000  |
| C | 3.835009000  | -0.229797000 | 1.902587000  |
| H | 4.716386000  | 0.349983000  | 2.137999000  |
| C | 3.616350000  | -1.615349000 | 2.252732000  |
| H | 4.304301000  | -2.244474000 | 2.799152000  |
| C | 2.348705000  | -2.011283000 | 1.730016000  |
| H | 1.873733000  | -2.977259000 | 1.818794000  |
| C | 3.239663000  | -1.791785000 | -1.941996000 |
| H | 2.282938000  | -1.752206000 | -2.444155000 |
| C | 3.802789000  | -2.943702000 | -1.279928000 |
| H | 3.352330000  | -3.924005000 | -1.213731000 |
| C | 5.080169000  | -2.556223000 | -0.729505000 |
| H | 5.748540000  | -3.192185000 | -0.165741000 |
| C | 5.299714000  | -1.165485000 | -1.046227000 |
| H | 6.160893000  | -0.577541000 | -0.760679000 |
| C | 4.159594000  | -0.690838000 | -1.794171000 |
| H | 4.011457000  | 0.313592000  | -2.164308000 |
| C | -0.503265000 | 4.210277000  | 0.001872000  |
| C | -1.423590000 | 2.264095000  | -1.779253000 |
| C | -2.254585000 | 2.176430000  | 0.994061000  |
| C | 0.434959000  | 2.329399000  | 1.846488000  |
| C | 1.271172000  | 2.255129000  | -1.041949000 |
| N | 0.525477000  | -1.038194000 | 0.419728000  |
| H | -0.515494000 | -0.521561000 | 1.158028000  |

**TS(W(CO)<sub>5</sub>(Z-2) → W(CO)<sub>5</sub>(Z-3))**

|    |              |              |              |
|----|--------------|--------------|--------------|
| Fe | 3.816730000  | -1.134316000 | 0.084911000  |
| O  | -0.903993000 | 5.030967000  | -0.683250000 |
| O  | 1.906773000  | 2.855988000  | 1.827147000  |
| Fe | -2.887945000 | -2.137365000 | -0.146567000 |
| W  | -0.622853000 | 1.959126000  | 0.029742000  |
| C  | 1.013016000  | -0.454623000 | 1.190129000  |
| C  | 1.927400000  | -1.538699000 | 0.968556000  |
| C  | 3.021093000  | -1.801763000 | 1.910026000  |
| H  | 3.143062000  | -1.303975000 | 2.861036000  |
| O  | 1.197876000  | 1.550640000  | -2.595427000 |

|   |              |              |              |
|---|--------------|--------------|--------------|
| C | 3.834675000  | -2.843927000 | 1.369546000  |
| H | 4.709771000  | -3.273718000 | 1.835750000  |
| O | -3.279844000 | 1.648421000  | -1.744396000 |
| C | 3.302663000  | -3.209955000 | 0.072707000  |
| H | 3.722906000  | -3.951424000 | -0.592548000 |
| O | -2.538633000 | 2.371861000  | 2.583727000  |
| C | 2.144834000  | -2.414629000 | -0.188603000 |
| H | 1.530600000  | -2.461877000 | -1.074403000 |
| C | 4.067477000  | 0.898437000  | -0.516257000 |
| H | 3.342781000  | 1.685759000  | -0.376094000 |
| C | 4.166288000  | 0.029975000  | -1.662739000 |
| H | 3.532081000  | 0.062246000  | -2.536771000 |
| C | 5.267353000  | -0.875359000 | -1.434858000 |
| H | 5.596487000  | -1.657570000 | -2.104738000 |
| C | 5.840854000  | -0.567390000 | -0.146817000 |
| H | 6.673294000  | -1.079490000 | 0.315646000  |
| C | 5.094322000  | 0.528851000  | 0.424339000  |
| H | 5.272681000  | 0.993214000  | 1.383725000  |
| C | -0.870506000 | -1.459477000 | -0.150994000 |
| C | -1.377933000 | -1.494485000 | -1.503389000 |
| H | -1.433307000 | -0.660966000 | -2.185662000 |
| C | -1.757665000 | -2.853229000 | -1.793809000 |
| H | -2.176849000 | -3.203739000 | -2.726365000 |
| C | -1.498867000 | -3.656238000 | -0.622828000 |
| H | -1.696635000 | -4.713794000 | -0.520063000 |
| C | -0.962179000 | -2.797266000 | 0.398318000  |
| H | -0.651255000 | -3.096601000 | 1.388785000  |
| C | -4.186257000 | -0.830588000 | 0.916829000  |
| H | -3.914147000 | 0.119871000  | 1.352131000  |
| C | -4.123019000 | -2.111748000 | 1.577124000  |
| H | -3.789664000 | -2.290584000 | 2.590003000  |
| C | -4.588172000 | -3.113846000 | 0.647966000  |
| H | -4.650888000 | -4.176476000 | 0.837752000  |
| C | -4.937932000 | -2.449853000 | -0.585015000 |
| H | -5.307747000 | -2.928484000 | -1.481273000 |
| C | -4.688239000 | -1.039308000 | -0.419689000 |
| H | -4.837302000 | -0.273526000 | -1.166657000 |
| C | -0.801769000 | 3.873707000  | -0.414423000 |
| C | 1.000025000  | 2.458867000  | 1.181369000  |
| C | 0.538219000  | 1.688906000  | -1.621691000 |
| C | -2.294052000 | 1.680991000  | -1.085528000 |
| C | -1.822301000 | 2.201742000  | 1.656168000  |
| N | -0.265494000 | -0.331003000 | 0.535429000  |
| H | -0.178091000 | -0.141062000 | 1.752804000  |

**W(CO)<sub>4</sub>(E-2)**

|    |              |              |              |
|----|--------------|--------------|--------------|
| Fe | 3.449042000  | -1.518441000 | 0.074666000  |
| O  | -1.241340000 | 4.555656000  | -0.302089000 |
| O  | -0.228459000 | 2.012366000  | 3.313698000  |
| Fe | -3.748834000 | -1.125990000 | -0.254628000 |
| W  | 0.052120000  | 1.667858000  | 0.131141000  |

|   |              |              |              |
|---|--------------|--------------|--------------|
| C | 0.412957000  | -0.513165000 | 0.325259000  |
| C | 1.538771000  | -1.216161000 | 0.942244000  |
| C | 2.569804000  | -0.590034000 | 1.756088000  |
| H | 2.623991000  | 0.460315000  | 1.993187000  |
| O | 2.936011000  | 2.859191000  | 0.453436000  |
| C | 3.474002000  | -1.604435000 | 2.206744000  |
| H | 4.339546000  | -1.445578000 | 2.833816000  |
| O | 0.676154000  | 1.496705000  | -3.020870000 |
| C | 3.038928000  | -2.871925000 | 1.667982000  |
| H | 3.524812000  | -3.825755000 | 1.818881000  |
| C | 1.860779000  | -2.645019000 | 0.882768000  |
| H | 1.320587000  | -3.418874000 | 0.353141000  |
| C | 3.544117000  | -0.741272000 | -1.905345000 |
| H | 2.725816000  | -0.277814000 | -2.437423000 |
| C | 3.872300000  | -2.145441000 | -1.911192000 |
| H | 3.348091000  | -2.919768000 | -2.454041000 |
| C | 5.030946000  | -2.334404000 | -1.069582000 |
| H | 5.520933000  | -3.275782000 | -0.862404000 |
| C | 5.414914000  | -1.045153000 | -0.546073000 |
| H | 6.237238000  | -0.853418000 | 0.129112000  |
| C | 4.493263000  | -0.060185000 | -1.058359000 |
| H | 4.498910000  | 0.996828000  | -0.833141000 |
| C | -1.725027000 | -0.816079000 | -0.764127000 |
| C | -2.329715000 | 0.441409000  | -0.371172000 |
| H | -2.161554000 | 0.971440000  | 0.570756000  |
| C | -3.414734000 | 0.704123000  | -1.286872000 |
| H | -4.069233000 | 1.563033000  | -1.257742000 |
| C | -3.473605000 | -0.381404000 | -2.228441000 |
| H | -4.177858000 | -0.477406000 | -3.042119000 |
| C | -2.429679000 | -1.325680000 | -1.909083000 |
| H | -2.189447000 | -2.226136000 | -2.456078000 |
| C | -3.908939000 | -2.514527000 | 1.339394000  |
| H | -3.084252000 | -3.002924000 | 1.839986000  |
| C | -4.616464000 | -3.008165000 | 0.181372000  |
| H | -4.410685000 | -3.929102000 | -0.346476000 |
| C | -5.648238000 | -2.055289000 | -0.150859000 |
| H | -6.341895000 | -2.131989000 | -0.976510000 |
| C | -5.579232000 | -0.972717000 | 0.801853000  |
| H | -6.214719000 | -0.098308000 | 0.817341000  |
| C | -4.505387000 | -1.257263000 | 1.722465000  |
| H | -4.195809000 | -0.633727000 | 2.549710000  |
| C | -0.727715000 | 3.490506000  | -0.135045000 |
| C | -0.164392000 | 1.860479000  | 2.135699000  |
| C | 1.824461000  | 2.416691000  | 0.332794000  |
| C | 0.411158000  | 1.543366000  | -1.864110000 |
| N | -0.545981000 | -1.333537000 | -0.177161000 |
| H | -0.453450000 | -2.347442000 | -0.145165000 |

**W(CO)<sub>4</sub>(Z-2)**

|    |              |              |              |
|----|--------------|--------------|--------------|
| Fe | -2.299545000 | 2.395583000  | 0.136685000  |
| O  | 0.525451000  | -4.083424000 | -0.681455000 |



|    |              |              |              |
|----|--------------|--------------|--------------|
| O  | -3.962459000 | -3.710694000 | 0.082945000  |
| Fe | 4.206437000  | 0.513939000  | -0.116315000 |
| W  | -1.432374000 | -1.757512000 | 0.058007000  |
| C  | -0.154045000 | 0.031706000  | 0.221887000  |
| C  | -0.653100000 | 1.247786000  | 0.875458000  |
| C  | -1.769484000 | 1.235311000  | 1.819813000  |
| H  | -2.269150000 | 0.356246000  | 2.201596000  |
| O  | -1.766326000 | -1.361201000 | -3.111147000 |
| C  | -2.025770000 | 2.579624000  | 2.240394000  |
| H  | -2.776873000 | 2.886935000  | 2.953678000  |
| C  | -1.105853000 | 3.448896000  | 1.545708000  |
| H  | -1.061057000 | 4.525018000  | 1.636615000  |
| O  | -0.828331000 | -2.529676000 | 3.123319000  |
| C  | -0.270882000 | 2.645229000  | 0.702358000  |
| H  | 0.508739000  | 3.017042000  | 0.056908000  |
| C  | -2.840384000 | 1.920141000  | -1.873005000 |
| H  | -2.306313000 | 1.252257000  | -2.532748000 |
| C  | -2.612892000 | 3.335653000  | -1.742716000 |
| H  | -1.872071000 | 3.912162000  | -2.278831000 |
| C  | -3.542880000 | 3.848327000  | -0.764069000 |
| H  | -3.616839000 | 4.875051000  | -0.433672000 |
| C  | -4.345076000 | 2.746052000  | -0.291228000 |
| H  | -5.127928000 | 2.804087000  | 0.452213000  |
| C  | -3.909737000 | 1.552038000  | -0.973748000 |
| H  | -4.330344000 | 0.563062000  | -0.854441000 |
| C  | 2.156250000  | 0.982232000  | -0.156254000 |
| C  | 2.823051000  | 1.635575000  | -1.258970000 |
| H  | 2.600545000  | 1.494199000  | -2.307234000 |
| C  | 3.815405000  | 2.517331000  | -0.697873000 |
| H  | 4.488910000  | 3.148974000  | -1.259491000 |
| C  | 3.757675000  | 2.406701000  | 0.740668000  |
| H  | 4.382180000  | 2.939895000  | 1.443246000  |
| C  | 2.736672000  | 1.450138000  | 1.080716000  |
| H  | 2.438614000  | 1.144216000  | 2.073062000  |
| C  | 4.477894000  | -1.584321000 | -0.280571000 |
| H  | 3.697455000  | -2.326740000 | -0.379558000 |
| C  | 5.040989000  | -1.109358000 | 0.960560000  |
| H  | 4.743769000  | -1.420556000 | 1.952247000  |
| C  | 6.067826000  | -0.145447000 | 0.644005000  |
| H  | 6.669010000  | 0.399712000  | 1.358273000  |
| C  | 6.140251000  | -0.025530000 | -0.792703000 |
| H  | 6.806481000  | 0.623875000  | -1.343476000 |
| C  | 5.157742000  | -0.914796000 | -1.364203000 |
| H  | 4.966532000  | -1.056987000 | -2.418862000 |
| C  | -0.254281000 | -3.212293000 | -0.395193000 |
| C  | -2.996415000 | -3.010088000 | 0.062849000  |
| C  | -1.670919000 | -1.467642000 | -1.930034000 |
| C  | -1.075891000 | -2.203127000 | 2.008563000  |
| N  | 1.098869000  | 0.017678000  | -0.282035000 |
| H  | 1.359176000  | -0.834789000 | -0.771174000 |

**W(CO)<sub>4</sub>(κC, κN-2)**

|    |              |              |              |
|----|--------------|--------------|--------------|
| Fe | 3.335715000  | -1.208307000 | 0.165776000  |
| O  | -3.189688000 | 2.465260000  | -1.430591000 |
| O  | 1.224264000  | 4.755301000  | -0.650824000 |
| Fe | -2.775671000 | -2.082185000 | 0.043360000  |
| W  | -0.323671000 | 2.056499000  | -0.053370000 |
| C  | 0.789450000  | 0.632960000  | 0.875072000  |
| C  | 1.992027000  | 0.001573000  | 1.304396000  |
| C  | 3.304590000  | 0.640516000  | 1.203227000  |
| H  | 3.478976000  | 1.618137000  | 0.777524000  |
| O  | 0.809570000  | 1.314437000  | -2.965282000 |
| C  | 4.269131000  | -0.217701000 | 1.812830000  |
| H  | 5.326708000  | -0.017053000 | 1.908876000  |
| C  | 3.590344000  | -1.412069000 | 2.273177000  |
| H  | 4.058237000  | -2.250643000 | 2.769563000  |
| O  | -1.325084000 | 3.652125000  | 2.567278000  |
| C  | 2.202649000  | -1.301222000 | 1.946016000  |
| H  | 1.437763000  | -2.030412000 | 2.162028000  |
| C  | 2.662294000  | -1.577401000 | -1.824519000 |
| H  | 1.743303000  | -1.196421000 | -2.243514000 |
| C  | 2.814375000  | -2.821295000 | -1.111872000 |
| H  | 2.032346000  | -3.542318000 | -0.920854000 |
| C  | 4.196089000  | -2.931570000 | -0.706394000 |
| H  | 4.631537000  | -3.746314000 | -0.144602000 |
| C  | 4.890696000  | -1.751347000 | -1.161930000 |
| H  | 5.936398000  | -1.528638000 | -1.000926000 |
| C  | 3.939520000  | -0.910474000 | -1.850140000 |
| H  | 4.146952000  | 0.046560000  | -2.307168000 |
| C  | -0.843980000 | -1.313532000 | 0.423505000  |
| C  | -0.980507000 | -1.624608000 | -0.977321000 |
| H  | -0.904387000 | -0.920825000 | -1.791947000 |
| C  | -1.253644000 | -3.035589000 | -1.086706000 |
| H  | -1.410271000 | -3.577541000 | -2.008407000 |
| C  | -1.303434000 | -3.590848000 | 0.244148000  |
| H  | -1.503194000 | -4.622667000 | 0.496386000  |
| C  | -1.052812000 | -2.525694000 | 1.183378000  |
| H  | -1.022136000 | -2.614956000 | 2.261113000  |
| C  | -4.241855000 | -0.666804000 | 0.630867000  |
| H  | -4.045392000 | 0.298207000  | 1.076997000  |
| C  | -4.444566000 | -1.908507000 | 1.339019000  |
| H  | -4.421392000 | -2.040903000 | 2.411983000  |
| C  | -4.685586000 | -2.944186000 | 0.362818000  |
| H  | -4.864952000 | -3.989061000 | 0.575488000  |
| C  | -4.631292000 | -2.341337000 | -0.947983000 |
| H  | -4.763900000 | -2.855794000 | -1.889671000 |
| C  | -4.358578000 | -0.933990000 | -0.782206000 |
| H  | -4.254728000 | -0.204173000 | -1.572653000 |
| C  | -2.106267000 | 2.403855000  | -0.939381000 |
| C  | 0.610137000  | 3.748828000  | -0.447498000 |
| C  | 0.370067000  | 1.533964000  | -1.883137000 |
| C  | -0.977843000 | 3.017224000  | 1.629000000  |

|                                                   |              |              |              |
|---------------------------------------------------|--------------|--------------|--------------|
| N                                                 | -0.553567000 | -0.012118000 | 0.978155000  |
| H                                                 | -0.994905000 | 0.110083000  | 1.889702000  |
| <b><i>cis</i>(N,H)-W(CO)<sub>4</sub>(H)(Z-15)</b> |              |              |              |
| Fe                                                | -3.349652000 | -1.610392000 | -0.265060000 |
| O                                                 | 0.506285000  | 5.060692000  | 0.184112000  |
| O                                                 | -2.909669000 | 2.686557000  | -0.943414000 |
| Fe                                                | 3.546422000  | -1.425313000 | 0.255756000  |
| W                                                 | 0.027145000  | 1.891541000  | 0.070906000  |
| C                                                 | -0.512549000 | -0.176457000 | -0.399595000 |
| C                                                 | -1.397619000 | -1.160277000 | -0.968920000 |
| C                                                 | -2.392564000 | -0.855738000 | -1.987825000 |
| H                                                 | -2.551640000 | 0.115456000  | -2.432309000 |
| O                                                 | -1.129644000 | 1.834725000  | 3.070554000  |
| C                                                 | -3.072475000 | -2.070379000 | -2.326622000 |
| H                                                 | -3.856026000 | -2.172756000 | -3.063586000 |
| C                                                 | -2.536528000 | -3.133127000 | -1.506672000 |
| H                                                 | -2.859204000 | -4.164677000 | -1.517169000 |
| O                                                 | 1.588548000  | 2.056438000  | -2.742558000 |
| C                                                 | -1.513254000 | -2.583446000 | -0.665021000 |
| H                                                 | -0.943109000 | -3.123141000 | 0.075331000  |
| C                                                 | -3.813502000 | -0.535957000 | 1.512572000  |
| H                                                 | -3.152280000 | 0.147867000  | 2.024497000  |
| C                                                 | -3.911484000 | -1.954055000 | 1.753947000  |
| H                                                 | -3.337615000 | -2.516366000 | 2.477197000  |
| C                                                 | -4.911367000 | -2.488751000 | 0.859858000  |
| H                                                 | -5.212413000 | -3.524760000 | 0.788939000  |
| C                                                 | -5.428387000 | -1.399212000 | 0.066755000  |
| H                                                 | -6.182981000 | -1.476970000 | -0.703631000 |
| C                                                 | -4.747265000 | -0.191518000 | 0.467878000  |
| H                                                 | -4.903593000 | 0.795219000  | 0.055425000  |
| C                                                 | 1.516049000  | -1.081344000 | 0.815331000  |
| C                                                 | 2.404175000  | -0.727943000 | 1.899619000  |
| H                                                 | 2.470678000  | 0.251618000  | 2.349851000  |
| C                                                 | 3.130112000  | -1.910740000 | 2.275349000  |
| H                                                 | 3.865870000  | -1.976371000 | 3.064104000  |
| C                                                 | 2.716028000  | -2.989414000 | 1.409082000  |
| H                                                 | 3.093178000  | -4.002227000 | 1.430239000  |
| C                                                 | 1.727907000  | -2.480716000 | 0.492737000  |
| H                                                 | 1.243310000  | -3.036800000 | -0.294883000 |
| C                                                 | 4.066875000  | -0.346627000 | -1.502720000 |
| H                                                 | 3.400099000  | 0.269905000  | -2.087110000 |
| C                                                 | 4.307384000  | -1.755175000 | -1.698347000 |
| H                                                 | 3.847426000  | -2.379199000 | -2.452010000 |
| C                                                 | 5.270053000  | -2.184740000 | -0.711877000 |
| H                                                 | 5.652240000  | -3.189014000 | -0.591201000 |
| C                                                 | 5.622543000  | -1.040008000 | 0.094198000  |
| H                                                 | 6.313611000  | -1.037318000 | 0.925784000  |
| C                                                 | 4.876537000  | 0.095396000  | -0.393004000 |
| H                                                 | 4.913487000  | 1.099753000  | 0.004893000  |
| C                                                 | 0.296292000  | 3.896917000  | 0.140872000  |
| C                                                 | -1.816487000 | 2.402037000  | -0.596683000 |

|   |              |              |              |
|---|--------------|--------------|--------------|
| C | -0.722437000 | 1.825104000  | 1.958722000  |
| C | 1.004196000  | 1.964821000  | -1.717193000 |
| N | 0.593402000  | -0.188942000 | 0.258942000  |
| H | 1.502846000  | 2.377455000  | 0.943687000  |

***cis*(C,H)-W(CO)<sub>4</sub>(H)(Z-15)**

|    |              |              |              |
|----|--------------|--------------|--------------|
| Fe | 3.621436000  | -1.266892000 | 0.253256000  |
| O  | 0.322706000  | 5.059298000  | 0.267325000  |
| O  | -2.972675000 | 2.562843000  | -1.331958000 |
| Fe | -3.240001000 | -1.766123000 | -0.218562000 |
| W  | -0.122511000 | 1.897891000  | 0.039082000  |
| C  | 0.683428000  | -0.053210000 | 0.465091000  |
| C  | 1.711378000  | -0.848038000 | 1.085534000  |
| C  | 2.759437000  | -0.290926000 | 1.925237000  |
| H  | 2.859088000  | 0.757231000  | 2.166680000  |
| O  | -1.415143000 | 1.916883000  | 2.984684000  |
| C  | 3.586318000  | -1.367022000 | 2.382299000  |
| H  | 4.444741000  | -1.275477000 | 3.032283000  |
| C  | 3.079751000  | -2.598618000 | 1.818028000  |
| H  | 3.499731000  | -3.583130000 | 1.969161000  |
| O  | 1.550851000  | 2.024457000  | -2.706383000 |
| C  | 1.935264000  | -2.289687000 | 1.010455000  |
| H  | 1.343371000  | -2.996393000 | 0.449733000  |
| C  | 3.799026000  | -0.560008000 | -1.748113000 |
| H  | 3.015363000  | -0.081536000 | -2.316433000 |
| C  | 4.067143000  | -1.975222000 | -1.699208000 |
| H  | 3.520457000  | -2.744551000 | -2.226457000 |
| C  | 5.195557000  | -2.184085000 | -0.822387000 |
| H  | 5.638098000  | -3.138250000 | -0.571867000 |
| C  | 5.621476000  | -0.895876000 | -0.329726000 |
| H  | 6.436047000  | -0.717266000 | 0.358439000  |
| C  | 4.755255000  | 0.108581000  | -0.898714000 |
| H  | 4.811218000  | 1.173296000  | -0.721599000 |
| C  | -1.183697000 | -1.360420000 | -0.618077000 |
| C  | -1.949077000 | -1.355742000 | -1.845003000 |
| H  | -2.021756000 | -0.526746000 | -2.534059000 |
| C  | -2.533391000 | -2.661454000 | -2.002099000 |
| H  | -3.153143000 | -2.980865000 | -2.827809000 |
| C  | -2.158425000 | -3.464329000 | -0.862397000 |
| H  | -2.456468000 | -4.487193000 | -0.679891000 |
| C  | -1.334051000 | -2.661709000 | 0.004835000  |
| H  | -0.913386000 | -2.966457000 | 0.951580000  |
| C  | -4.055669000 | -0.340997000 | 1.129083000  |
| H  | -3.514015000 | 0.475334000  | 1.584004000  |
| C  | -4.194430000 | -1.669088000 | 1.674581000  |
| H  | -3.773614000 | -2.019256000 | 2.606896000  |
| C  | -4.993260000 | -2.446353000 | 0.757108000  |
| H  | -5.270118000 | -3.484655000 | 0.877184000  |
| C  | -5.347119000 | -1.597125000 | -0.355292000 |
| H  | -5.933971000 | -1.888355000 | -1.215525000 |
| C  | -4.765995000 | -0.296102000 | -0.126601000 |

|   |              |              |              |
|---|--------------|--------------|--------------|
| H | -4.845592000 | 0.559968000  | -0.781593000 |
| C | 0.135861000  | 3.892584000  | 0.175196000  |
| C | -1.926846000 | 2.320802000  | -0.844622000 |
| C | -0.959963000 | 1.878508000  | 1.891737000  |
| C | 0.920235000  | 1.941655000  | -1.706264000 |
| N | -0.408408000 | -0.279635000 | -0.179696000 |
| H | 1.346129000  | 2.431616000  | 0.869658000  |

**W(CO)<sub>4</sub>(E-3)**

|    |              |              |              |
|----|--------------|--------------|--------------|
| Fe | -3.175663000 | -1.809806000 | -0.124014000 |
| O  | 2.025454000  | 3.990056000  | 0.275299000  |
| O  | 0.133125000  | 2.049137000  | -3.185687000 |
| Fe | 3.555141000  | -1.354505000 | 0.153313000  |
| W  | -0.346362000 | 1.962623000  | -0.006281000 |
| C  | -0.051375000 | -1.124722000 | -0.303416000 |
| C  | -1.380803000 | -0.971396000 | -0.848115000 |
| C  | -2.318586000 | 0.089310000  | -0.497741000 |
| H  | -2.269494000 | 0.741059000  | 0.381683000  |
| O  | -2.360445000 | 4.380791000  | -0.344772000 |
| C  | -3.488066000 | -0.063053000 | -1.319865000 |
| H  | -4.368462000 | 0.562249000  | -1.287060000 |
| O  | -0.679686000 | 2.188831000  | 3.180994000  |
| C  | -3.288277000 | -1.206550000 | -2.173889000 |
| H  | -3.990472000 | -1.577517000 | -2.906591000 |
| C  | -2.003366000 | -1.778810000 | -1.879219000 |
| H  | -1.551323000 | -2.626498000 | -2.374112000 |
| C  | -2.822200000 | -3.011966000 | 1.589898000  |
| H  | -1.858723000 | -3.180880000 | 2.050484000  |
| C  | -3.413661000 | -3.807506000 | 0.540615000  |
| H  | -2.973157000 | -4.678256000 | 0.075321000  |
| C  | -4.699758000 | -3.235168000 | 0.221270000  |
| H  | -5.386567000 | -3.596327000 | -0.531500000 |
| C  | -4.901283000 | -2.086195000 | 1.071420000  |
| H  | -5.765852000 | -1.437227000 | 1.068567000  |
| C  | -3.740360000 | -1.948036000 | 1.917114000  |
| H  | -3.584480000 | -1.180483000 | 2.662369000  |
| C  | 1.842052000  | -0.315699000 | 0.856015000  |
| C  | 2.983676000  | 0.565026000  | 0.870964000  |
| H  | 3.081421000  | 1.489914000  | 0.325310000  |
| C  | 3.972956000  | -0.012678000 | 1.740633000  |
| H  | 4.942870000  | 0.411464000  | 1.957180000  |
| C  | 3.449389000  | -1.249960000 | 2.267044000  |
| H  | 3.951131000  | -1.911182000 | 2.959103000  |
| C  | 2.135049000  | -1.447723000 | 1.717204000  |
| H  | 1.458590000  | -2.257821000 | 1.951705000  |
| C  | 3.281972000  | -1.941526000 | -1.865217000 |
| H  | 2.413786000  | -1.714140000 | -2.468710000 |
| C  | 3.463242000  | -3.108381000 | -1.033487000 |
| H  | 2.759258000  | -3.919521000 | -0.907259000 |
| C  | 4.758515000  | -3.008287000 | -0.402877000 |
| H  | 5.188056000  | -3.723358000 | 0.284974000  |

|   |              |              |              |
|---|--------------|--------------|--------------|
| C | 5.375752000  | -1.781239000 | -0.845266000 |
| H | 6.346100000  | -1.412947000 | -0.542651000 |
| C | 4.463473000  | -1.122013000 | -1.748476000 |
| H | 4.630912000  | -0.176222000 | -2.244467000 |
| C | 1.112214000  | 3.217940000  | 0.169739000  |
| C | -0.053559000 | 1.977709000  | -2.016210000 |
| C | -1.575026000 | 3.486845000  | -0.214204000 |
| C | -0.571530000 | 2.062395000  | 2.004476000  |
| N | 0.598151000  | -0.086995000 | 0.180032000  |
| H | 0.423497000  | -2.105768000 | -0.328691000 |

**W(CO)<sub>4</sub>(Z-3)**

|    |              |              |              |
|----|--------------|--------------|--------------|
| Fe | -4.191313000 | 0.182615000  | 0.040480000  |
| O  | 4.305805000  | -2.782944000 | -0.727582000 |
| O  | 0.167109000  | -4.224553000 | 0.258994000  |
| Fe | 2.021295000  | 2.249455000  | -0.137765000 |
| W  | 1.545669000  | -1.425009000 | 0.054643000  |
| C  | -1.313729000 | -0.476941000 | 1.040423000  |
| C  | -2.508853000 | 0.298574000  | 1.314501000  |
| C  | -3.643848000 | -0.291522000 | 2.018181000  |
| H  | -3.661483000 | -1.280106000 | 2.456118000  |
| O  | 0.805790000  | -1.427594000 | -3.074150000 |
| C  | -4.699508000 | 0.675276000  | 2.054640000  |
| H  | -5.668187000 | 0.539667000  | 2.513776000  |
| C  | -4.247903000 | 1.859620000  | 1.360953000  |
| H  | -4.825031000 | 2.760243000  | 1.206421000  |
| O  | 2.365799000  | -1.750847000 | 3.148435000  |
| C  | -2.908621000 | 1.637048000  | 0.899416000  |
| H  | -2.308760000 | 2.342960000  | 0.348593000  |
| C  | -3.758762000 | -0.994892000 | -1.678430000 |
| H  | -2.813239000 | -1.478547000 | -1.881718000 |
| C  | -4.130266000 | 0.341345000  | -2.074963000 |
| H  | -3.516089000 | 1.032545000  | -2.634758000 |
| C  | -5.469714000 | 0.590671000  | -1.596290000 |
| H  | -6.031827000 | 1.504870000  | -1.726719000 |
| C  | -5.922542000 | -0.590782000 | -0.902273000 |
| H  | -6.882277000 | -0.715574000 | -0.420374000 |
| C  | -4.863444000 | -1.570491000 | -0.950115000 |
| H  | -4.893069000 | -2.562062000 | -0.520669000 |
| C  | 0.133074000  | 1.269853000  | 0.260441000  |
| C  | 0.131300000  | 1.867087000  | -1.057384000 |
| H  | -0.045694000 | 1.345715000  | -1.986385000 |
| C  | 0.340103000  | 3.280892000  | -0.890410000 |
| H  | 0.384851000  | 4.010397000  | -1.686490000 |
| C  | 0.500656000  | 3.550991000  | 0.519311000  |
| H  | 0.689146000  | 4.518249000  | 0.962928000  |
| C  | 0.390945000  | 2.305349000  | 1.232885000  |
| H  | 0.443517000  | 2.163259000  | 2.302687000  |
| C  | 3.865248000  | 1.134683000  | 0.114052000  |
| H  | 4.024478000  | 0.131907000  | 0.482081000  |
| C  | 3.873197000  | 2.332531000  | 0.914572000  |

|   |              |              |              |
|---|--------------|--------------|--------------|
| H | 3.985393000  | 2.376593000  | 1.988719000  |
| C | 3.739121000  | 3.459752000  | 0.026207000  |
| H | 3.711652000  | 4.499900000  | 0.319975000  |
| C | 3.626513000  | 2.956248000  | -1.322893000 |
| H | 3.502539000  | 3.554085000  | -2.215117000 |
| C | 3.694515000  | 1.519319000  | -1.269072000 |
| H | 3.660135000  | 0.847437000  | -2.114686000 |
| C | 3.256515000  | -2.286854000 | -0.432416000 |
| C | 0.720125000  | -3.159126000 | 0.174100000  |
| C | 1.068188000  | -1.384482000 | -1.914609000 |
| C | 2.057181000  | -1.587877000 | 2.012671000  |
| N | -0.150203000 | -0.109613000 | 0.550381000  |
| H | -1.396611000 | -1.537529000 | 1.272200000  |

**[W(CO)<sub>4</sub>...-(E-3)]**

|    |              |              |              |
|----|--------------|--------------|--------------|
| Fe | -4.501020000 | 0.222160000  | 0.111791000  |
| O  | 3.989649000  | -3.617938000 | -1.025505000 |
| O  | 3.138308000  | -2.081093000 | 2.995121000  |
| Fe | 2.231285000  | 2.612829000  | -0.261130000 |
| W  | 1.737786000  | -1.767780000 | 0.122778000  |
| C  | -1.408891000 | 0.694823000  | 0.637780000  |
| C  | -2.768314000 | 0.969533000  | 1.068500000  |
| C  | -3.530594000 | 0.136281000  | 1.984388000  |
| H  | -3.172070000 | -0.763142000 | 2.466342000  |
| O  | 0.019572000  | -4.282139000 | 0.897328000  |
| C  | -4.825563000 | 0.733658000  | 2.151803000  |
| H  | -5.622497000 | 0.355486000  | 2.776177000  |
| O  | 0.316014000  | -1.900372000 | -2.755401000 |
| C  | -4.880289000 | 1.925428000  | 1.334372000  |
| H  | -5.728806000 | 2.588589000  | 1.240558000  |
| C  | -3.619766000 | 2.071083000  | 0.661386000  |
| H  | -3.334773000 | 2.856760000  | -0.022309000 |
| C  | -3.975851000 | -0.915443000 | -1.606034000 |
| H  | -2.966038000 | -1.094292000 | -1.948713000 |
| C  | -4.813724000 | 0.195345000  | -1.985560000 |
| H  | -4.543868000 | 0.991022000  | -2.665551000 |
| C  | -6.074247000 | 0.058554000  | -1.293738000 |
| H  | -6.912622000 | 0.738130000  | -1.360040000 |
| C  | -6.012494000 | -1.136394000 | -0.486550000 |
| H  | -6.796919000 | -1.508708000 | 0.157699000  |
| C  | -4.714038000 | -1.737501000 | -0.677252000 |
| H  | -4.358363000 | -2.645222000 | -0.210096000 |
| C  | 0.607289000  | 1.234567000  | -0.459579000 |
| C  | 1.667552000  | 0.676446000  | 0.402728000  |
| H  | 1.628421000  | 0.663460000  | 1.486114000  |
| C  | 2.907057000  | 0.631357000  | -0.409165000 |
| H  | 3.893376000  | 0.364485000  | -0.056292000 |
| C  | 2.578591000  | 1.121858000  | -1.727833000 |
| H  | 3.264009000  | 1.186490000  | -2.559968000 |
| C  | 1.195296000  | 1.514219000  | -1.748420000 |
| H  | 0.651197000  | 1.904760000  | -2.595001000 |

|   |              |              |              |
|---|--------------|--------------|--------------|
| C | 1.508025000  | 4.402512000  | 0.610300000  |
| H | 0.485554000  | 4.554836000  | 0.926002000  |
| C | 2.036415000  | 4.669247000  | -0.705070000 |
| H | 1.480120000  | 5.062015000  | -1.544560000 |
| C | 3.431218000  | 4.295779000  | -0.710661000 |
| H | 4.104103000  | 4.365906000  | -1.553885000 |
| C | 3.765459000  | 3.800933000  | 0.603965000  |
| H | 4.733977000  | 3.437713000  | 0.918743000  |
| C | 2.577578000  | 3.867059000  | 1.418827000  |
| H | 2.497927000  | 3.557045000  | 2.451720000  |
| C | 3.111385000  | -2.937466000 | -0.577772000 |
| C | 2.619215000  | -1.911557000 | 1.939668000  |
| C | 0.692941000  | -3.339692000 | 0.590823000  |
| C | 0.839737000  | -1.795801000 | -1.695912000 |
| N | -0.728056000 | 1.492433000  | -0.133576000 |
| H | -0.981657000 | -0.252947000 | 1.006997000  |

TS(W(CO)<sub>5</sub>(E-2) → W(CO)<sub>4</sub>(κC, κN-2))

|    |              |              |              |
|----|--------------|--------------|--------------|
| Fe | -3.571560000 | -1.105930000 | -0.047590000 |
| O  | 3.060593000  | 3.506087000  | -0.407128000 |
| O  | -0.875673000 | 3.598559000  | -2.296468000 |
| Fe | 2.987429000  | -1.916702000 | -0.158101000 |
| W  | 0.365085000  | 1.855852000  | 0.101890000  |
| C  | -0.840539000 | 0.300725000  | -0.565229000 |
| C  | -2.171607000 | 0.106403000  | -1.071537000 |
| C  | -3.329951000 | 0.900156000  | -0.669819000 |
| H  | -3.294288000 | 1.759766000  | -0.016407000 |
| O  | -1.133613000 | 3.968470000  | 1.881919000  |
| C  | -4.486944000 | 0.360765000  | -1.312692000 |
| H  | -5.496511000 | 0.735105000  | -1.220010000 |
| O  | 1.573041000  | 0.855544000  | 2.911877000  |
| C  | -4.080730000 | -0.784752000 | -2.098410000 |
| H  | -4.736675000 | -1.409267000 | -2.688429000 |
| C  | -2.668400000 | -0.962203000 | -1.944685000 |
| H  | -2.078602000 | -1.742713000 | -2.404373000 |
| C  | -2.747011000 | -1.972798000 | 1.713599000  |
| H  | -1.736570000 | -1.809854000 | 2.059228000  |
| C  | -3.171505000 | -3.008923000 | 0.803718000  |
| H  | -2.540379000 | -3.770748000 | 0.368474000  |
| C  | -4.590071000 | -2.850921000 | 0.584925000  |
| H  | -5.207677000 | -3.467023000 | -0.053803000 |
| C  | -5.036759000 | -1.714081000 | 1.353528000  |
| H  | -6.046581000 | -1.329735000 | 1.390223000  |
| C  | -3.895138000 | -1.168646000 | 2.049791000  |
| H  | -3.899576000 | -0.309555000 | 2.705621000  |
| C  | 0.909052000  | -1.586701000 | -0.615065000 |
| C  | 1.062495000  | -1.958333000 | 0.767342000  |
| H  | 0.746977000  | -1.390092000 | 1.626141000  |
| C  | 1.680887000  | -3.262973000 | 0.804436000  |
| H  | 1.919691000  | -3.816064000 | 1.701727000  |
| C  | 1.926569000  | -3.687648000 | -0.549891000 |



|   |              |              |              |
|---|--------------|--------------|--------------|
| H | 2.384321000  | -4.616759000 | -0.857854000 |
| C | 1.464280000  | -2.642266000 | -1.431611000 |
| H | 1.493143000  | -2.656973000 | -2.513049000 |
| C | 4.165432000  | -0.194118000 | -0.567149000 |
| H | 3.806109000  | 0.743330000  | -0.966255000 |
| C | 4.642922000  | -1.315586000 | -1.339200000 |
| H | 4.691702000  | -1.369369000 | -2.418083000 |
| C | 5.044095000  | -2.353005000 | -0.419704000 |
| H | 5.436672000  | -3.323989000 | -0.688709000 |
| C | 4.812073000  | -1.872622000 | 0.921643000  |
| H | 5.003926000  | -2.418590000 | 1.834975000  |
| C | 4.269902000  | -0.539183000 | 0.830167000  |
| H | 3.989462000  | 0.086762000  | 1.664777000  |
| C | 2.039691000  | 2.937847000  | -0.175499000 |
| C | -0.406490000 | 2.914641000  | -1.448967000 |
| C | -0.525188000 | 3.183725000  | 1.211218000  |
| C | 1.140454000  | 1.151042000  | 1.847816000  |
| N | 0.203733000  | -0.475839000 | -1.188406000 |
| H | 0.069958000  | -0.620544000 | -2.191222000 |

TS(W(CO)<sub>4</sub>(Z-2) → W(CO)<sub>4</sub>(κC, κN-2))

|    |              |              |              |
|----|--------------|--------------|--------------|
| Fe | -3.164893000 | -1.449252000 | -0.129533000 |
| O  | 2.581885000  | 2.990069000  | 1.896481000  |
| O  | -1.615144000 | 4.774077000  | 0.239200000  |
| Fe | 2.938370000  | -1.992735000 | -0.019420000 |
| W  | 0.133958000  | 2.159268000  | 0.016403000  |
| C  | -0.666832000 | 0.530557000  | -0.984672000 |
| C  | -1.840985000 | -0.226169000 | -1.301786000 |
| C  | -3.182919000 | 0.352992000  | -1.251328000 |
| H  | -3.408795000 | 1.343767000  | -0.884174000 |
| O  | -1.459865000 | 1.382456000  | 2.691154000  |
| C  | -4.097778000 | -0.575566000 | -1.834240000 |
| H  | -5.161205000 | -0.427255000 | -1.957157000 |
| C  | -3.357122000 | -1.757665000 | -2.224993000 |
| H  | -3.776044000 | -2.639792000 | -2.688638000 |
| O  | 1.499527000  | 3.641211000  | -2.500215000 |
| C  | -1.981973000 | -1.567520000 | -1.879742000 |
| H  | -1.181706000 | -2.270710000 | -2.049842000 |
| C  | -2.528577000 | -1.748650000 | 1.884913000  |
| H  | -1.627538000 | -1.342547000 | 2.318166000  |
| C  | -2.649514000 | -3.014988000 | 1.207955000  |
| H  | -1.855013000 | -3.730724000 | 1.051683000  |
| C  | -4.020943000 | -3.154920000 | 0.777350000  |
| H  | -4.434102000 | -3.991349000 | 0.230840000  |
| C  | -4.739467000 | -1.971015000 | 1.184098000  |
| H  | -5.784008000 | -1.766467000 | 0.993926000  |
| C  | -3.813953000 | -1.097728000 | 1.865572000  |
| H  | -4.039272000 | -0.130316000 | 2.290361000  |
| C  | 1.009520000  | -1.369627000 | -0.602030000 |
| C  | 0.975826000  | -1.854720000 | 0.755567000  |
| H  | 0.703706000  | -1.272932000 | 1.623791000  |

|   |              |              |              |
|---|--------------|--------------|--------------|
| C | 1.390462000  | -3.234294000 | 0.734478000  |
| H | 1.477230000  | -3.881123000 | 1.595949000  |
| C | 1.693280000  | -3.594381000 | -0.630453000 |
| H | 2.039620000  | -4.559960000 | -0.971004000 |
| C | 1.462079000  | -2.439975000 | -1.462953000 |
| H | 1.584219000  | -2.382929000 | -2.535891000 |
| C | 4.300867000  | -0.374942000 | -0.182747000 |
| H | 4.063048000  | 0.622032000  | -0.527413000 |
| C | 4.745351000  | -1.477624000 | -1.001823000 |
| H | 4.892760000  | -1.456230000 | -2.072800000 |
| C | 4.960612000  | -2.614809000 | -0.139405000 |
| H | 5.288936000  | -3.596474000 | -0.451883000 |
| C | 4.648751000  | -2.214274000 | 1.211978000  |
| H | 4.701394000  | -2.843752000 | 2.089415000  |
| C | 4.241594000  | -0.829962000 | 1.185279000  |
| H | 3.944693000  | -0.235586000 | 2.037929000  |
| C | 1.637064000  | 2.755279000  | 1.208062000  |
| C | -0.922604000 | 3.799799000  | 0.175184000  |
| C | -0.852746000 | 1.614194000  | 1.695927000  |
| C | 1.020829000  | 3.047344000  | -1.591663000 |
| N | 0.659216000  | -0.040189000 | -1.019515000 |
| H | 1.298101000  | 0.358937000  | -1.701786000 |

TS(W(CO)<sub>5</sub>(E-2) → [W(CO)<sub>4</sub>... (E-3)])

|    |              |              |              |
|----|--------------|--------------|--------------|
| Fe | 3.517871000  | -1.435081000 | 0.102501000  |
| O  | -1.206174000 | 4.509894000  | -0.621579000 |
| O  | -0.645678000 | 2.230151000  | 3.220658000  |
| Fe | -3.704177000 | -1.178103000 | -0.272936000 |
| W  | -0.031817000 | 1.644754000  | 0.120121000  |
| C  | 0.395086000  | -0.575741000 | 0.389097000  |
| C  | 1.582927000  | -1.229993000 | 0.960262000  |
| C  | 2.580700000  | -0.596236000 | 1.805950000  |
| H  | 2.599125000  | 0.445253000  | 2.085617000  |
| O  | 2.813241000  | 2.855936000  | 0.656394000  |
| C  | 3.515876000  | -1.599232000 | 2.223580000  |
| H  | 4.373441000  | -1.436957000 | 2.860999000  |
| O  | 0.829376000  | 1.353229000  | -2.966527000 |
| C  | 3.123265000  | -2.858906000 | 1.631570000  |
| H  | 3.637923000  | -3.802009000 | 1.751800000  |
| C  | 1.944677000  | -2.637591000 | 0.845667000  |
| H  | 1.391772000  | -3.376878000 | 0.286429000  |
| C  | 3.653171000  | -0.611372000 | -1.860880000 |
| H  | 2.843964000  | -0.155140000 | -2.411497000 |
| C  | 4.007625000  | -2.008121000 | -1.885075000 |
| H  | 3.510939000  | -2.780518000 | -2.455413000 |
| C  | 5.145707000  | -2.192288000 | -1.014916000 |
| H  | 5.645363000  | -3.129075000 | -0.810127000 |
| C  | 5.489565000  | -0.907455000 | -0.454104000 |
| H  | 6.288780000  | -0.714740000 | 0.248077000  |
| C  | 4.563418000  | 0.070179000  | -0.972478000 |
| H  | 4.547221000  | 1.123240000  | -0.729753000 |

|   |              |              |              |
|---|--------------|--------------|--------------|
| C | -1.672098000 | -0.977476000 | -0.776106000 |
| C | -2.266700000 | 0.347511000  | -0.605298000 |
| H | -2.167590000 | 1.019376000  | 0.262218000  |
| C | -3.325743000 | 0.474671000  | -1.571923000 |
| H | -3.972926000 | 1.332211000  | -1.686923000 |
| C | -3.381521000 | -0.742020000 | -2.341922000 |
| H | -4.066254000 | -0.944520000 | -3.152766000 |
| C | -2.384176000 | -1.649591000 | -1.843030000 |
| H | -2.140341000 | -2.628727000 | -2.226444000 |
| C | -3.919698000 | -2.366916000 | 1.470127000  |
| H | -3.106212000 | -2.835033000 | 2.007030000  |
| C | -4.658664000 | -2.951797000 | 0.376951000  |
| H | -4.496532000 | -3.932961000 | -0.046600000 |
| C | -5.646357000 | -1.992036000 | -0.055368000 |
| H | -6.349923000 | -2.126237000 | -0.865288000 |
| C | -5.515328000 | -0.813385000 | 0.766873000  |
| H | -6.108996000 | 0.086459000  | 0.687502000  |
| C | -4.448569000 | -1.046312000 | 1.711316000  |
| H | -4.108495000 | -0.352370000 | 2.467654000  |
| C | -0.743680000 | 3.446632000  | -0.337033000 |
| C | -0.450296000 | 1.979445000  | 2.074989000  |
| C | 1.723398000  | 2.397705000  | 0.455708000  |
| C | 0.492581000  | 1.433678000  | -1.832776000 |
| N | -0.527448000 | -1.516269000 | -0.161482000 |
| H | -0.587845000 | -0.900293000 | 1.121571000  |

**TS(W(CO)<sub>4</sub>(Z-2) → W(CO)<sub>4</sub>(Z-3))**

|    |              |              |              |
|----|--------------|--------------|--------------|
| Fe | 3.405244000  | -1.502222000 | 0.206081000  |
| O  | -2.437633000 | 4.018910000  | -0.148026000 |
| O  | 2.105565000  | 4.163699000  | 0.649865000  |
| Fe | -3.358401000 | -1.689509000 | -0.167494000 |
| W  | -0.018996000 | 1.962888000  | -0.061528000 |
| C  | 0.593108000  | -0.165617000 | 0.052234000  |
| C  | 1.440603000  | -1.036936000 | 0.842627000  |
| C  | 2.423114000  | -0.511921000 | 1.784605000  |
| H  | 2.539936000  | 0.530987000  | 2.039977000  |
| O  | 0.527636000  | 2.721661000  | -3.140858000 |
| C  | 3.157851000  | -1.614422000 | 2.324863000  |
| H  | 3.945313000  | -1.550285000 | 3.061912000  |
| C  | 2.673373000  | -2.828640000 | 1.706998000  |
| H  | 3.045695000  | -3.825807000 | 1.895043000  |
| O  | -0.530268000 | 1.827028000  | 3.108304000  |
| C  | 1.627915000  | -2.485172000 | 0.788698000  |
| H  | 1.078919000  | -3.177214000 | 0.169459000  |
| C  | 3.820903000  | -0.697597000 | -1.720446000 |
| H  | 3.131358000  | -0.118647000 | -2.319620000 |
| C  | 3.969965000  | -2.132139000 | -1.742197000 |
| H  | 3.417361000  | -2.820996000 | -2.365638000 |
| C  | 4.994718000  | -2.484543000 | -0.787326000 |
| H  | 5.335711000  | -3.485186000 | -0.560803000 |
| C  | 5.473969000  | -1.267795000 | -0.177380000 |

|   |              |              |              |
|---|--------------|--------------|--------------|
| H | 6.234971000  | -1.198228000 | 0.587356000  |
| C | 4.745626000  | -0.161839000 | -0.751767000 |
| H | 4.870220000  | 0.882421000  | -0.502361000 |
| C | -1.333404000 | -1.638334000 | -0.783153000 |
| C | -2.202538000 | -1.885521000 | -1.920293000 |
| H | -2.270706000 | -1.258164000 | -2.797223000 |
| C | -2.899272000 | -3.116940000 | -1.679166000 |
| H | -3.611818000 | -3.582081000 | -2.345161000 |
| C | -2.498968000 | -3.618174000 | -0.384362000 |
| H | -2.868807000 | -4.516893000 | 0.088799000  |
| C | -1.538842000 | -2.709161000 | 0.181191000  |
| H | -1.066196000 | -2.802718000 | 1.146564000  |
| C | -3.905868000 | 0.129716000  | 0.785673000  |
| H | -3.242861000 | 0.965381000  | 0.959069000  |
| C | -4.125393000 | -0.979318000 | 1.680771000  |
| H | -3.661148000 | -1.117216000 | 2.647296000  |
| C | -5.076525000 | -1.870540000 | 1.059474000  |
| H | -5.443962000 | -2.798411000 | 1.475490000  |
| C | -5.442152000 | -1.310919000 | -0.219707000 |
| H | -6.128989000 | -1.748415000 | -0.931016000 |
| C | -4.715305000 | -0.075441000 | -0.390718000 |
| H | -4.768480000 | 0.582148000  | -1.246841000 |
| C | -1.499451000 | 3.281600000  | -0.107674000 |
| C | 1.269693000  | 3.347807000  | 0.377119000  |
| C | 0.325799000  | 2.377561000  | -2.021216000 |
| C | -0.355093000 | 1.824962000  | 1.934015000  |
| N | -0.536066000 | -0.480812000 | -0.705066000 |
| H | 0.538363000  | 0.061855000  | -1.268466000 |

**TS(W(CO)<sub>4</sub>(Z-2) → *cis*(N,H)-W(CO)<sub>4</sub>(H)(Z-15))**

|    |              |              |              |
|----|--------------|--------------|--------------|
| Fe | 3.472870000  | -1.453508000 | 0.241152000  |
| O  | -2.154723000 | 3.877688000  | -1.452203000 |
| O  | 1.614657000  | 4.490454000  | 0.877229000  |
| Fe | -3.351093000 | -1.712272000 | -0.207353000 |
| W  | -0.073452000 | 1.941092000  | -0.006465000 |
| C  | 0.619010000  | -0.077998000 | 0.526487000  |
| C  | 1.585892000  | -0.979744000 | 1.096933000  |
| C  | 2.668643000  | -0.500604000 | 1.947836000  |
| H  | 2.815928000  | 0.532551000  | 2.227615000  |
| O  | 1.460746000  | 1.881170000  | -2.837407000 |
| C  | 3.441817000  | -1.628148000 | 2.367468000  |
| H  | 4.304231000  | -1.599713000 | 3.017954000  |
| C  | 2.876174000  | -2.814961000 | 1.763311000  |
| H  | 3.252332000  | -3.821842000 | 1.878395000  |
| O  | -1.415204000 | 2.262249000  | 2.898504000  |
| C  | 1.744846000  | -2.428246000 | 0.972898000  |
| H  | 1.122869000  | -3.090492000 | 0.391363000  |
| C  | 3.684789000  | -0.718035000 | -1.747890000 |
| H  | 2.921194000  | -0.204707000 | -2.312978000 |
| C  | 3.906148000  | -2.141502000 | -1.722366000 |
| H  | 3.338525000  | -2.882895000 | -2.267084000 |

|   |              |              |              |
|---|--------------|--------------|--------------|
| C | 5.021615000  | -2.402171000 | -0.842740000 |
| H | 5.430513000  | -3.374484000 | -0.605215000 |
| C | 5.486520000  | -1.137301000 | -0.325953000 |
| H | 6.302094000  | -0.997582000 | 0.370001000  |
| C | 4.656896000  | -0.095435000 | -0.881357000 |
| H | 4.749368000  | 0.963693000  | -0.686937000 |
| C | -1.285311000 | -1.392105000 | -0.550441000 |
| C | -1.997455000 | -1.405697000 | -1.807611000 |
| H | -2.023165000 | -0.598755000 | -2.525763000 |
| C | -2.618711000 | -2.697682000 | -1.936607000 |
| H | -3.218592000 | -3.027693000 | -2.772604000 |
| C | -2.308069000 | -3.470800000 | -0.758218000 |
| H | -2.641263000 | -4.478320000 | -0.553204000 |
| C | -1.494161000 | -2.662184000 | 0.114614000  |
| H | -1.112425000 | -2.944523000 | 1.084106000  |
| C | -4.142754000 | -0.221775000 | 1.085647000  |
| H | -3.586029000 | 0.582970000  | 1.544359000  |
| C | -4.357582000 | -1.531904000 | 1.650218000  |
| H | -3.981085000 | -1.882692000 | 2.600991000  |
| C | -5.162063000 | -2.290678000 | 0.722318000  |
| H | -5.488049000 | -3.313375000 | 0.852073000  |
| C | -5.443465000 | -1.448827000 | -0.416104000 |
| H | -6.017035000 | -1.730113000 | -1.288407000 |
| C | -4.811961000 | -0.170836000 | -0.192562000 |
| H | -4.839156000 | 0.677597000  | -0.862165000 |
| C | -1.342198000 | 3.205607000  | -0.898519000 |
| C | 0.978005000  | 3.546372000  | 0.532845000  |
| C | 0.895593000  | 1.856631000  | -1.794951000 |
| C | -0.932650000 | 2.110338000  | 1.826204000  |
| N | -0.517061000 | -0.299370000 | -0.090006000 |
| H | -1.502795000 | 0.849040000  | -0.140578000 |

**TS(*cis*(N,H)-W(CO)<sub>4</sub>(H)(Z-15) → *cis*(C,H)-W(CO)<sub>4</sub>(H)(Z-15))**

|    |              |              |              |
|----|--------------|--------------|--------------|
| Fe | 3.432344000  | -1.589899000 | 0.099552000  |
| O  | 1.845212000  | 4.436577000  | -0.783457000 |
| O  | -2.396161000 | 2.485490000  | 1.866776000  |
| Fe | -3.423386000 | -1.508024000 | -0.201042000 |
| W  | 0.107972000  | 1.859762000  | -0.070116000 |
| C  | 0.570859000  | -0.230681000 | 0.192782000  |
| C  | 1.444325000  | -1.236185000 | 0.743153000  |
| C  | 2.384514000  | -1.011657000 | 1.833317000  |
| H  | 2.513812000  | -0.084927000 | 2.370470000  |
| O  | 1.519405000  | 2.349753000  | 2.752038000  |
| C  | 3.065738000  | -2.244683000 | 2.094847000  |
| H  | 3.812924000  | -2.403106000 | 2.859158000  |
| C  | 2.591034000  | -3.235215000 | 1.156064000  |
| H  | 2.931525000  | -4.258826000 | 1.088484000  |
| O  | -1.890687000 | 3.227229000  | -2.243733000 |
| C  | 1.601393000  | -2.624110000 | 0.316851000  |
| H  | 1.084223000  | -3.098717000 | -0.502916000 |
| C  | 3.925453000  | -0.338912000 | -1.544411000 |

|   |              |              |              |
|---|--------------|--------------|--------------|
| H | 3.233841000  | 0.366970000  | -1.982219000 |
| C | 4.077697000  | -1.723882000 | -1.916149000 |
| H | 3.545154000  | -2.231092000 | -2.708538000 |
| C | 5.062260000  | -2.314701000 | -1.039474000 |
| H | 5.394491000  | -3.343483000 | -1.056736000 |
| C | 5.515595000  | -1.292921000 | -0.126250000 |
| H | 6.244893000  | -1.423602000 | 0.661278000  |
| C | 4.810109000  | -0.071833000 | -0.436435000 |
| H | 4.920333000  | 0.874930000  | 0.073208000  |
| C | -1.491900000 | -1.071008000 | -1.005641000 |
| C | -2.525066000 | -0.639930000 | -1.921494000 |
| H | -2.665919000 | 0.368326000  | -2.281211000 |
| C | -3.292371000 | -1.794628000 | -2.298910000 |
| H | -4.131124000 | -1.800141000 | -2.980177000 |
| C | -2.755451000 | -2.939674000 | -1.603681000 |
| H | -3.125303000 | -3.953266000 | -1.668170000 |
| C | -1.654062000 | -2.499085000 | -0.787474000 |
| H | -1.061961000 | -3.118805000 | -0.133010000 |
| C | -3.659627000 | -0.699187000 | 1.750931000  |
| H | -2.895209000 | -0.188647000 | 2.317540000  |
| C | -3.923386000 | -2.116708000 | 1.766843000  |
| H | -3.386302000 | -2.856428000 | 2.344126000  |
| C | -5.028106000 | -2.374822000 | 0.873841000  |
| H | -5.460249000 | -3.342788000 | 0.660462000  |
| C | -5.445001000 | -1.114998000 | 0.305387000  |
| H | -6.245144000 | -0.974347000 | -0.408116000 |
| C | -4.597858000 | -0.079552000 | 0.845904000  |
| H | -4.657950000 | 0.975770000  | 0.621574000  |
| C | 1.171924000  | 3.512386000  | -0.476507000 |
| C | -1.475019000 | 2.195897000  | 1.174678000  |
| C | 1.017799000  | 2.141329000  | 1.694591000  |
| C | -1.152089000 | 2.720777000  | -1.483585000 |
| N | -0.512173000 | -0.219109000 | -0.493617000 |
| H | 1.255622000  | 1.461056000  | -1.380663000 |

**TS(*cis*(C,H)-W(CO)<sub>4</sub>(H)(Z-15) → W(CO)<sub>4</sub>(Z-3))**

|    |              |              |              |
|----|--------------|--------------|--------------|
| Fe | 3.578710000  | -1.329485000 | 0.242575000  |
| O  | 1.152152000  | 4.697161000  | 0.718606000  |
| O  | -2.785354000 | 3.310044000  | -1.121346000 |
| Fe | -3.262121000 | -1.750424000 | -0.209769000 |
| W  | -0.138278000 | 1.887442000  | -0.001646000 |
| C  | 0.666858000  | -0.134570000 | 0.426044000  |
| C  | 1.663180000  | -0.962374000 | 1.058164000  |
| C  | 2.695429000  | -0.462590000 | 1.954191000  |
| H  | 2.799333000  | 0.564531000  | 2.273501000  |
| O  | -1.357986000 | 1.992853000  | 2.973947000  |
| C  | 3.504128000  | -1.572190000 | 2.361375000  |
| H  | 4.347118000  | -1.526295000 | 3.035707000  |
| C  | 3.003539000  | -2.762017000 | 1.711314000  |
| H  | 3.415315000  | -3.756584000 | 1.808203000  |
| O  | 1.148532000  | 2.143997000  | -2.942704000 |

|   |              |              |              |
|---|--------------|--------------|--------------|
| C | 1.877078000  | -2.397200000 | 0.901794000  |
| H | 1.296315000  | -3.062774000 | 0.282419000  |
| C | 3.776619000  | -0.467775000 | -1.693109000 |
| H | 2.999898000  | 0.063532000  | -2.224322000 |
| C | 4.027115000  | -1.886076000 | -1.756443000 |
| H | 3.472617000  | -2.603387000 | -2.345159000 |
| C | 5.148105000  | -2.178505000 | -0.894106000 |
| H | 5.577599000  | -3.155051000 | -0.718615000 |
| C | 5.587866000  | -0.939367000 | -0.299066000 |
| H | 6.402581000  | -0.826215000 | 0.402660000  |
| C | 4.737476000  | 0.118556000  | -0.789776000 |
| H | 4.808387000  | 1.165238000  | -0.529537000 |
| C | -1.214193000 | -1.395943000 | -0.652844000 |
| C | -2.008217000 | -1.353201000 | -1.862371000 |
| H | -2.077408000 | -0.508693000 | -2.532506000 |
| C | -2.624828000 | -2.642040000 | -2.024897000 |
| H | -3.271068000 | -2.934906000 | -2.839993000 |
| C | -2.243262000 | -3.471030000 | -0.905678000 |
| H | -2.563019000 | -4.488759000 | -0.731489000 |
| C | -1.378460000 | -2.704326000 | -0.046414000 |
| H | -0.944753000 | -3.035797000 | 0.885236000  |
| C | -3.996099000 | -0.324526000 | 1.183447000  |
| H | -3.411860000 | 0.460639000  | 1.639867000  |
| C | -4.174905000 | -1.657562000 | 1.704379000  |
| H | -3.750388000 | -2.042749000 | 2.621051000  |
| C | -5.020332000 | -2.384700000 | 0.787267000  |
| H | -5.334663000 | -3.413985000 | 0.891636000  |
| C | -5.362704000 | -1.499181000 | -0.300173000 |
| H | -5.976444000 | -1.749916000 | -1.154334000 |
| C | -4.727518000 | -0.226193000 | -0.056483000 |
| H | -4.788097000 | 0.646834000  | -0.691106000 |
| C | 0.639823000  | 3.658921000  | 0.437557000  |
| C | -1.802326000 | 2.802517000  | -0.695786000 |
| C | -0.912551000 | 1.901111000  | 1.877204000  |
| C | 0.668451000  | 2.004606000  | -1.867346000 |
| N | -0.422182000 | -0.323037000 | -0.223862000 |
| H | 1.514678000  | 1.334041000  | 0.385149000  |
